# Supplementary material for: Metal complexes of a pro-vitamin K3 analog phthiocol (2-hydroxy-3-methylnaphthalene-1,4-dione): synthesis, characterization, and anticancer activity
Source: Royal Society of Chemistry journal article supplement (doi:10.1039/d2dt02748h), 2022-01-01
Supplement: d2dt02748h1.pdf [file d2dt02748h1.pdf]

**Metal complexes of pro-vitamin K3 analog phthiocol (2-hydroxy-3-methylnaphthalene-1,4-dione): Synthesis, Characterization and anticancer activity**

Shital Harihar<sup>1‡</sup>, Nishigandha Mone<sup>2‡</sup>, Surekha Satpute<sup>2</sup>, Dattatray Chadar<sup>1</sup>, Debamitra Chakravarty<sup>3</sup>, Thomas Weyhermüller<sup>4</sup>, Ray J. Butcher<sup>5</sup>, Sunita Salunke-Gawali<sup>1\*</sup>

**Supplementary Section**

## Figure Legends

**Figure S1.** FT-IR spectra of **pht, 1** and **1A** in region 4000  $\text{cm}^{-1}$  to 400  $\text{cm}^{-1}$ .

**Figure S2.** FT-IR spectra of **pht, 2** and **2A** in region 4000  $\text{cm}^{-1}$  to 400  $\text{cm}^{-1}$ .

**Figure S3.** FT-IR spectra of **pht, 3** and **3A** in region 4000  $\text{cm}^{-1}$  to 400  $\text{cm}^{-1}$ .

**Figure S4.** FT-IR spectra of **pht, 4** and **4A** in region 4000  $\text{cm}^{-1}$  to 400  $\text{cm}^{-1}$ .

**Figure S5.** FT-IR spectra of **pht, 5** and **5A** in region 4000  $\text{cm}^{-1}$  to 400  $\text{cm}^{-1}$ .

**Figure S6.** MALDI-TOF spectrum of **pht**.

**Figure S7.** MALDI-TOF spectrum of **1**.

**Figure S8.** MALDI-TOF spectrum of **2**.

**Figure S9.** MALDI-TOF spectrum of **3**.

**Figure S10.** MALDI-TOF spectrum of **4**.

**Figure S11.** MALDI-TOF spectrum of **5**.

**Figure S12.** MALDI-TOF spectrum of **1A**.

**Figure S13.** MALDI-TOF spectrum of **2A**.

**Figure S14.** MALDI-TOF spectrum of **3A**.

**Figure S15.** MALDI-TOF spectrum of **4A**.

**Figure S16.** MALDI-TOF spectrum of **5A**.

**Figure S17.** a) Thermograms of complexes **1** to **5**, b) DSC plots for complexes **1** to **5**.

**Figure S18.** a) Thermograms of complexes **1A** to **5A**, b) DSC plots for complexes **1A** to **5A**.

**Figure S19.**  $^1\text{H}$  and  $^{13}\text{C}$  NMR of **Na(pht)** in  $\text{DMSO-}d_6$ .

**Figure S20.**  $^1\text{H}$  and  $^{13}\text{C}$  NMR of **Na(pht)** in  $\text{DMSO-}d_6$ .

**Figure S20.**  $^1\text{H}$  and  $^{13}\text{C}$  NMR of **Na(pht)** in  $\text{DMSO-}d_6$ .

**Figure S21.** UV-Visible spectra of metal complexes of **pht** in DMSO with concentration  $1 \times 10^{-4}$  M.

**Figure S22.** UV-Visible spectra of metal complexes of **pht** in DMSO with concentration  $1 \times 10^{-4}$  M.

**Figure S23** Na-O bond distances as well as C=O bond distances of **Na(pht)**.

**Figure S24.** Important bond distances of **1** bond distances as well C=O bond.

**Figure S25.** Bond angles around Mn(II) centers of asymmetric unit of **1**.

**Figure S26.** Interplanar angles of pthiocol ligands. Table Hydrogen bonding geometries of **1**.

**Figure S27.** Atoms of **1** those are taking part in C-H $\cdots$ O, O-H $\cdots$ O hydrogen bonding interaction and  $\pi$ - $\pi$  stacking interactions.

**Figure S28.** Bond angles around Mn(II) of **1B**.

**Figure S29.** Plane of phthiocol ligands and interplanar angle in **1B**.

**Figure S30.** Bond distances of **1B**.

**Figure S31.** Neighbouring molecules of **1B**, O-H $\cdots$ O hydrogen bonding interaction and  $\pi$ - $\pi$  stacking interactions.

**Fig.S32** Molecular packing of **1B** down a-axis.

**Figure S33.** Bond distances and selected bond angles of **1A**.

**Figure S34.** Molecular packing of **1A**.

**Figure S35.** Polymeric chains of **1A** formed by O-H $\cdots$ O and connected through C-H $\cdots$ O and O-H $\cdots$ O interactions.

**Figure S36.** Molecular planes of **1A**. The orientations of polymeric chain are 84.12°.

**Figure S37.** Selected bond distances of the asymmetric unit of complex **3**. Water molecules were removed for clarity.

**Figure S38.** Cubane shaped arrangement of Ni(II) with bridged methoxy ligands.

**Figure S39** Tetrahedral arrangement of Ni(II) ions and Ni(II) $\cdots$ Ni(II) bond distances in **3**.

**Figure S40.** Ni-O bond distances of **3**.

**Figure S41.** Molecular packing showing hydrogen bonding of quinonoid oxygen with adsorbed water molecules down c axis of **3**.

**Figure S42a.** Effect of the phthiocol complexes on cell cycle of A) MCF-7 cell lines at 30  $\mu$ M concentration.

**Figure 42b.** Effect of phthiocol complexes on cell cycle of B) A549 cell lines at 30  $\mu$ M concentration.

**Figure S43a.** Effect of phthiocol complexes on cell proliferation of MCF-7 at day three, A) Fluorescence of control at Zero-hr, B) Fluorescence after Three-day treatment.

**Figure S43b.** Effect of phthiocol complexes on cell proliferation of MCF-7 day five after treatments. C) Fluorescence after five-day treatment.

## Table Legends

**Table S1.** FT-IR values of phthiocol (**pht**), and its metal complexes region  $4000\text{ cm}^{-1}$  to  $400\text{ cm}^{-1}$

**Table S2.** Hydrogen bonding geometries and other molecular interactions for **pht**, **1**, **1B**, **1A** and **3**

**Table S6.** Crystal data and structure refinement for **Na(pht)**

**Table S7.** Atomic coordinates ( $\times 10^4$ ) and equivalent isotropic displacement parameters ( $\text{\AA}^2 \times 10^3$ ) for **Na(pht)**.  $U(\text{eq})$  is defined as one third of the trace of the orthogonalized  $U_{ij}$  tensor.

**Table S8** Bond lengths [ $\text{\AA}$ ] and angles [ $^\circ$ ] for **Na(pht)**

**Table S9.** Anisotropic displacement parameters ( $\text{\AA}^2 \times 10^3$ ) for **Na(pht)**. The anisotropic displacement factor exponent takes the form:  $-2\pi^2[h^2a^*2U^{11} + \dots + 2hk a^* b^* U^{12}]$

**Table S10.** Torsion angles [ $^\circ$ ] for **Na(pht)**

**Table S11.** Crystal data and structure refinement for **1**

**Table S12.** Atomic coordinates ( $\times 10^4$ ) and equivalent isotropic displacement parameters ( $\text{\AA}^2 \times 10^3$ ) for **1**.  $U(\text{eq})$  is defined as one third of the trace of the orthogonalized  $U_{ij}$  tensor

**Table S13.** Bond lengths [ $\text{\AA}$ ] and angles [ $^\circ$ ] for **1**

**Table S14.** Crystal data and structure refinement for **1B**

**Table S15.** Anisotropic displacement parameters ( $\text{\AA}^2 \times 10^3$ ) for **1B**. The anisotropic displacement factor exponent takes the form:  $-2\pi^2[h^2a^*2U^{11} + \dots + 2hk a^* b^* U^{12}]$

**Table S15.** Atomic coordinates ( $\times 10^4$ ) and equivalent isotropic displacement parameters ( $\text{\AA}^2 \times 10^3$ ) for **1B**.  $U(\text{eq})$  is defined as one third of the trace of the orthogonalized  $U_{ij}$  tensor

**Table S16.** Bond lengths [ $\text{\AA}$ ] and angles [ $^\circ$ ] for **1B**

**Table S17.** Anisotropic displacement parameters ( $\text{\AA}^2 \times 10^3$ ) for **1B**. The anisotropic displacement factor exponent takes the form:  $-2\pi^2[h^2a^*2U^{11} + \dots + 2hk a^* b^* U^{12}]$

**Table S18.** Hydrogen coordinates ( $\times 10^4$ ) and isotropic displacement parameters ( $\text{\AA}^2 \times 10^3$ ) for **1B**

**Table S19.** Torsion angles [ $^\circ$ ] for **1B**

**Table S20.** Hydrogen bonds for **1B** [ $\text{\AA}$  and  $^\circ$ ]

**Table S21.** Crystal data and structure refinement for **1A**

**Table S22.** Atomic coordinates ( $\times 10^4$ ) and equivalent isotropic displacement parameters ( $\text{\AA}^2 \times 10^3$ ) for **1A**.  $U(\text{eq})$  is defined as one third of the trace of the orthogonalized  $U_{ij}$  tensor

**Table S23.** Bond lengths [ $\text{\AA}$ ] and angles [ $^\circ$ ] for **1A**

**Table S24.** Anisotropic displacement parameters ( $\text{\AA}^2 \times 10^3$ ) for **1A**. The anisotropic displacement factor exponent takes the form:  $-2\pi^2 [h^2 a^{*2} U^{11} + \dots + 2 h k a^* b^* U^{12}]$

**Table S25.** Hydrogen coordinates ( $\times 10^4$ ) and isotropic displacement parameters ( $\text{\AA}^2 \times 10^3$ ) for **1A**

**Table S26.** Torsion angles [ $^\circ$ ] for **1A**

**Table S27.** Hydrogen bonds for **1A** [ $\text{\AA}$  and  $^\circ$ ]

**Table S28.** Crystal data and structure refinement for **3**

**Table S29.** Atomic coordinates ( $\times 10^4$ ) and equivalent isotropic displacement parameters ( $\text{\AA}^2 \times 10^3$ ) for **3**.  $U(\text{eq})$  is defined as one third of the trace of the orthogonalized  $U^{ij}$  tensor

**Table S30.** Bond lengths [ $\text{\AA}$ ] and angles [ $^\circ$ ] for **3**

**Table S31.** Anisotropic displacement parameters ( $\text{\AA}^2 \times 10^3$ ) for **3**. The anisotropic displacement factor exponent takes the form:  $-2\pi^2 [h^2 a^{*2} U^{11} + \dots + 2 h k a^* b^* U^{12}]$

**Table S32.** Hydrogen coordinates ( $\times 10^4$ ) and isotropic displacement parameters ( $\text{\AA}^2 \times 10^3$ ) for **3**

**Table S33.** Torsion angles [ $^\circ$ ] for **3**

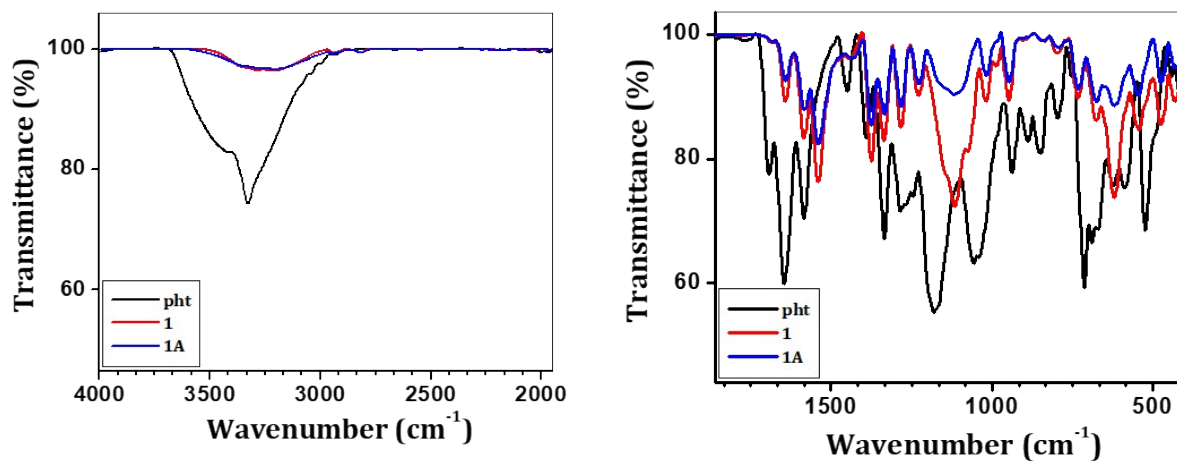

Figure S1. FT-IR spectra of **pht**, **1** and **1A** in region 4000  $\text{cm}^{-1}$  to 400  $\text{cm}^{-1}$ .

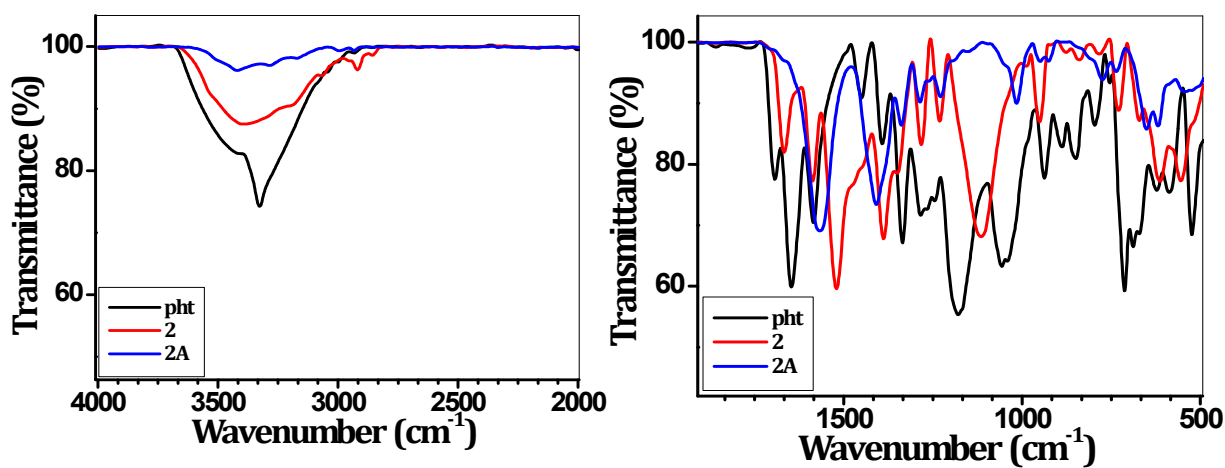

Figure S2. FT-IR spectra of **pht**, **2** and **2A** in region 4000  $\text{cm}^{-1}$  to 400  $\text{cm}^{-1}$ .

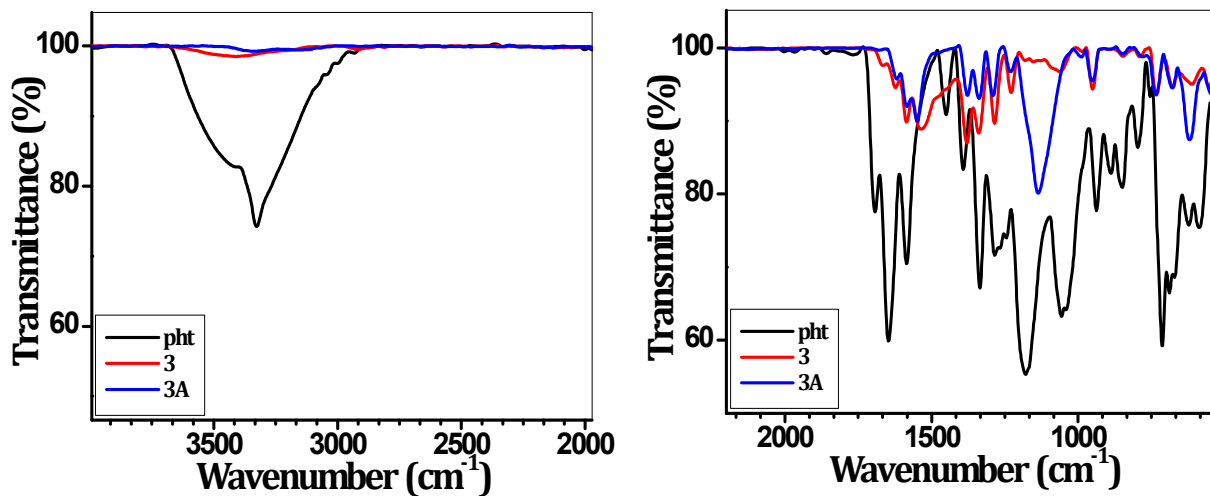

Figure S3. FT-IR spectra of **pht**, **3** and **3A** in region 4000  $\text{cm}^{-1}$  to 400  $\text{cm}^{-1}$ .

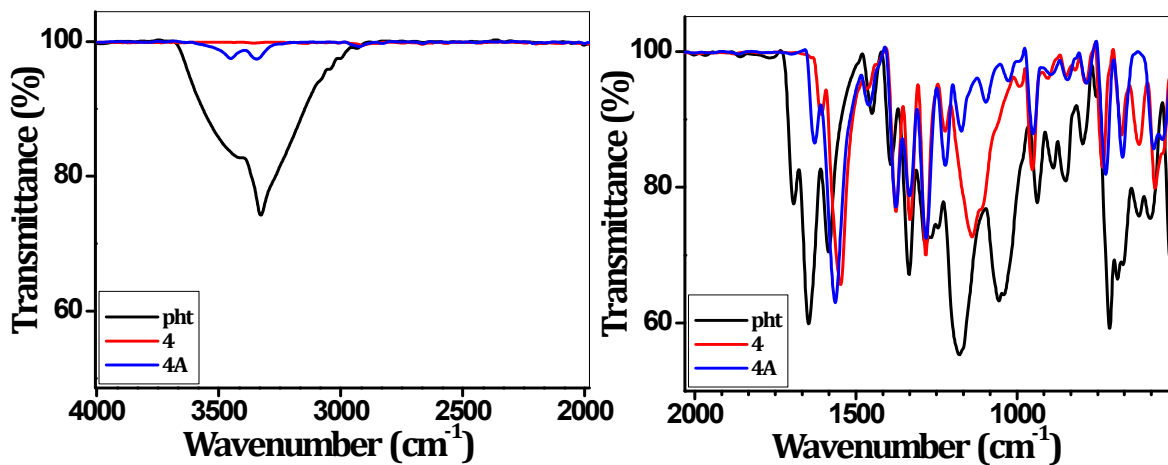

Figure S4. FT-IR spectra of **pht**, **4** and **4A** in region 4000  $\text{cm}^{-1}$  to 400  $\text{cm}^{-1}$ .

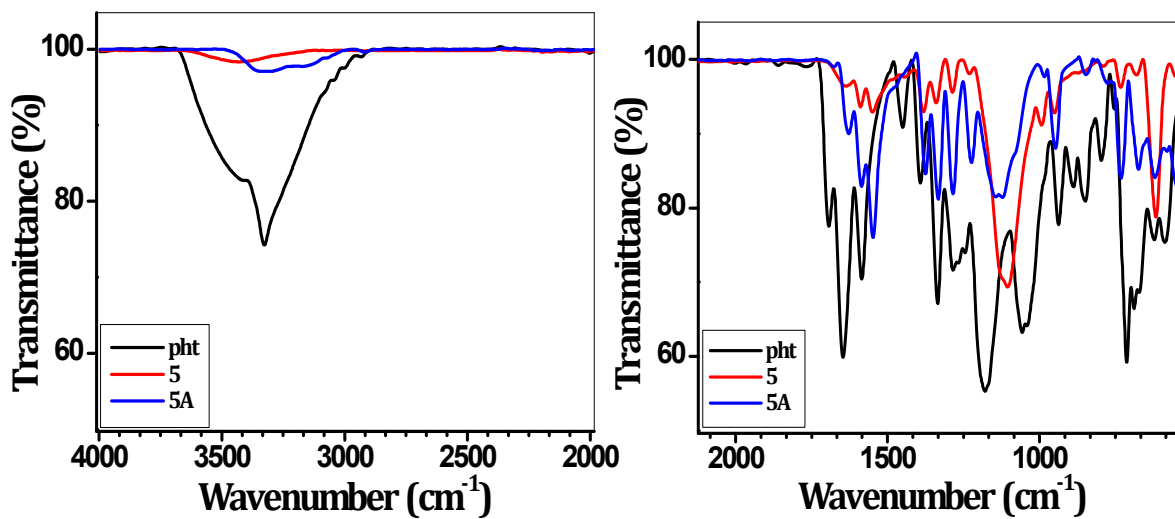

Figure S5. FT-IR spectra of **pht**, **5** and **5A** in region 4000  $\text{cm}^{-1}$  to 400  $\text{cm}^{-1}$ .

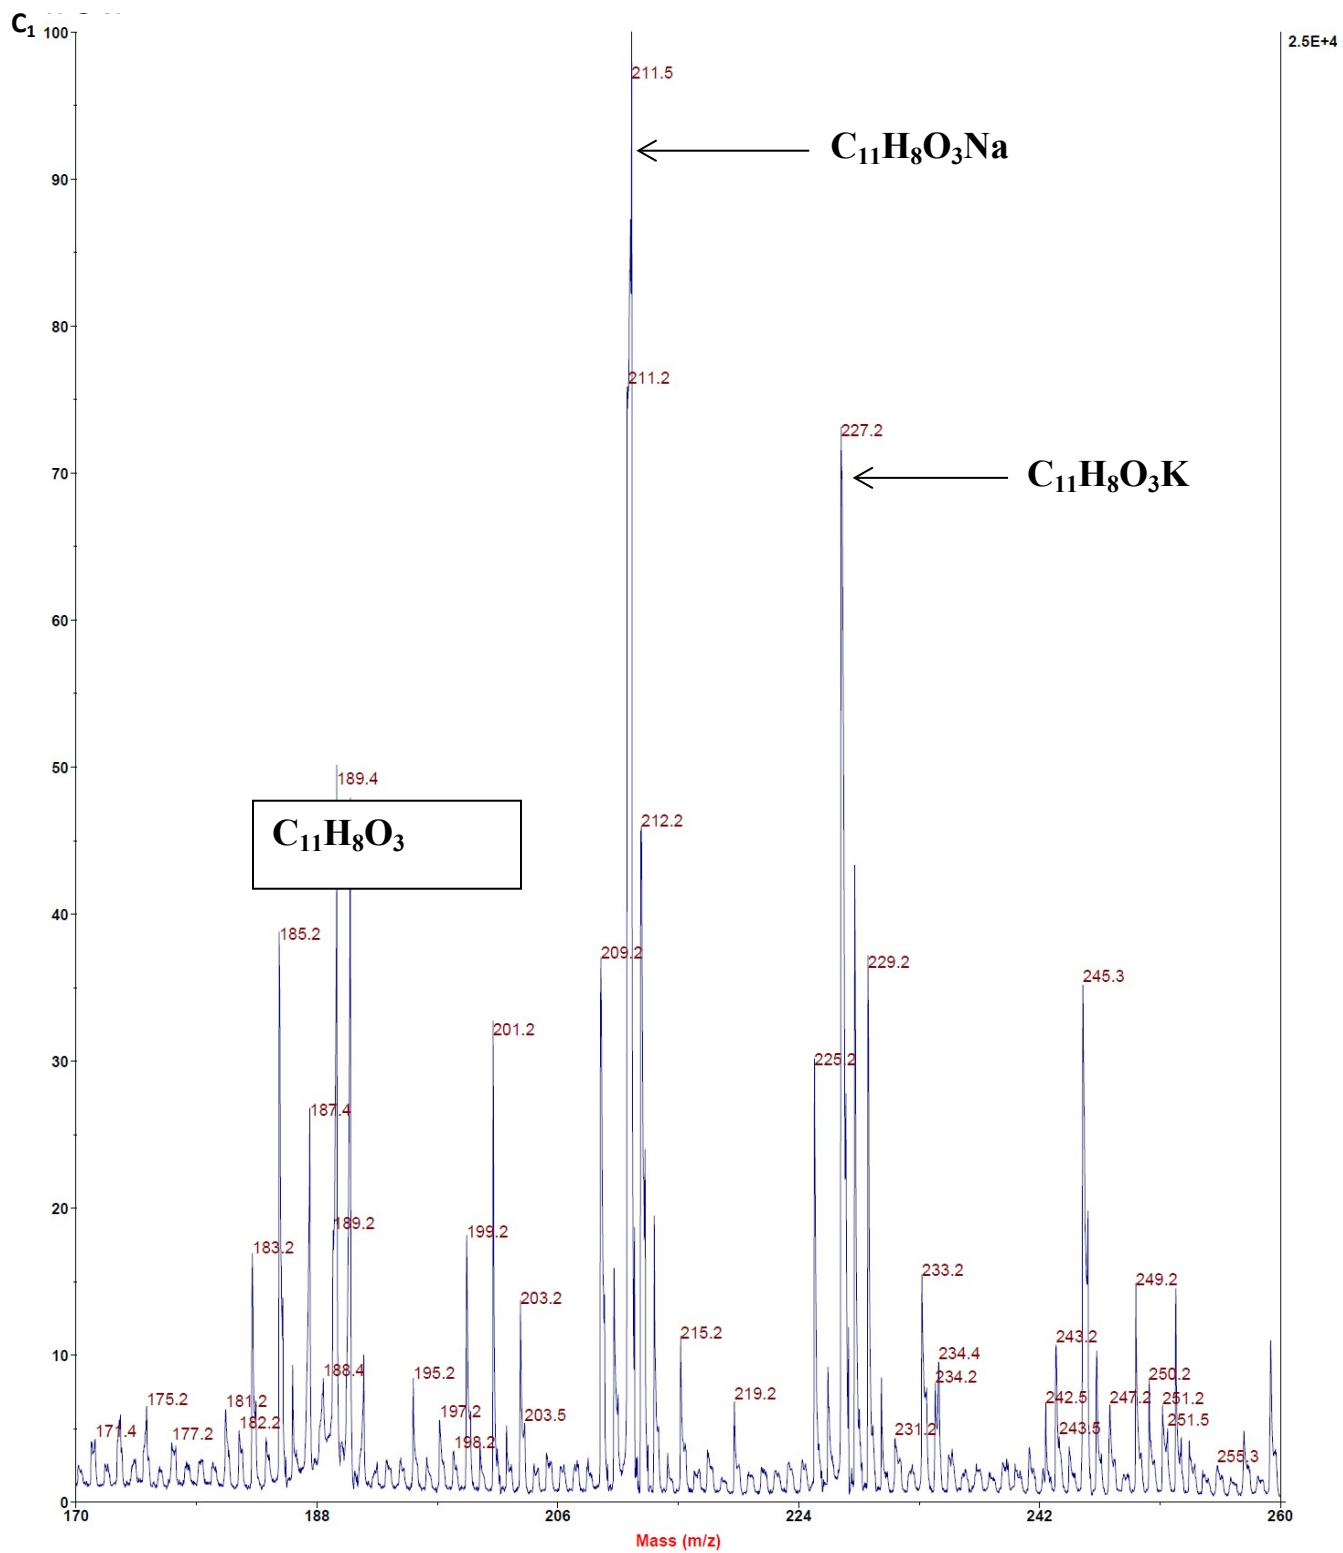

Figure S6. MALDI-TOF spectrum of pht.



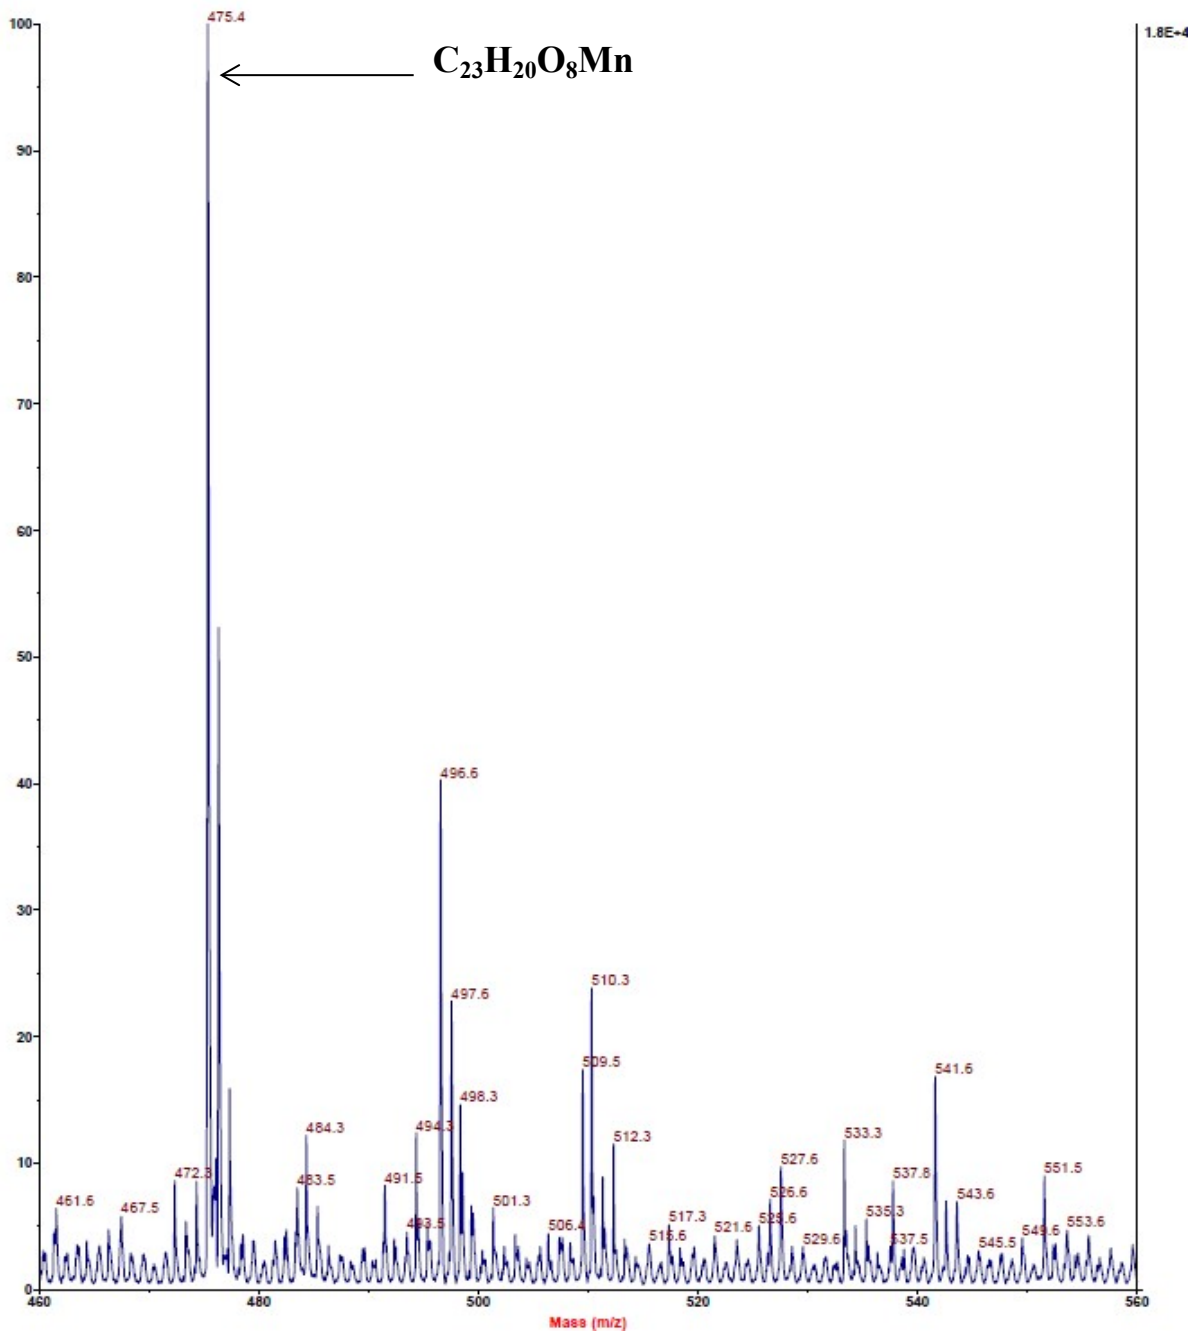

Figure S7. MALDI-TOF spectrum of 1.

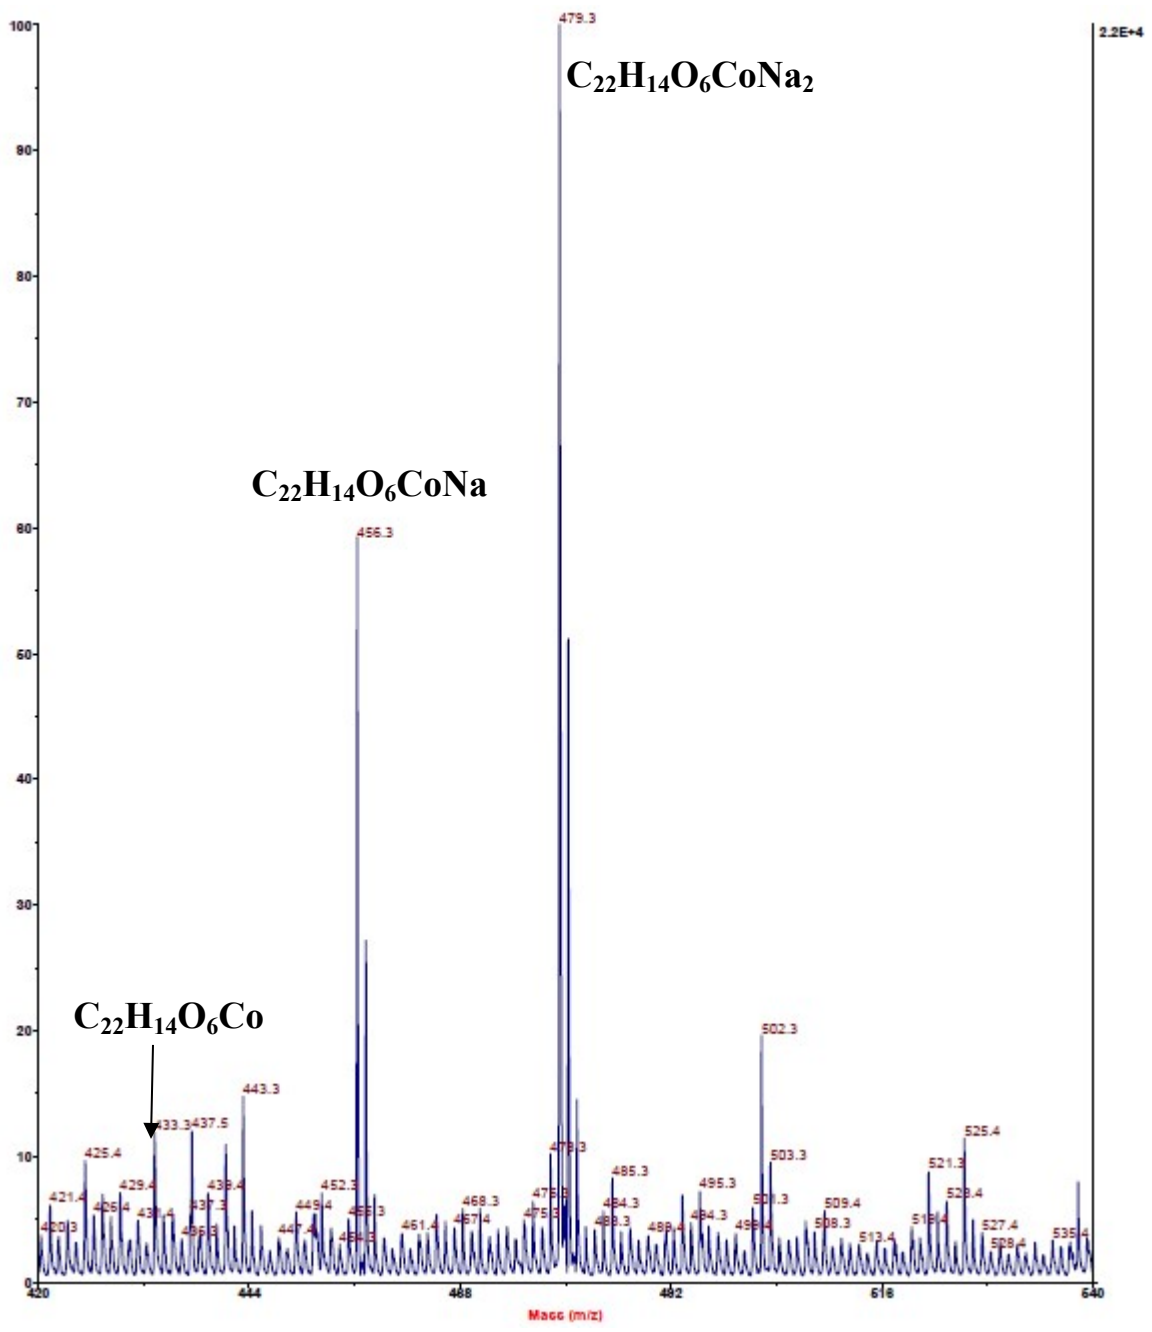

Figure S8. MALDI-TOF spectrum of 2.

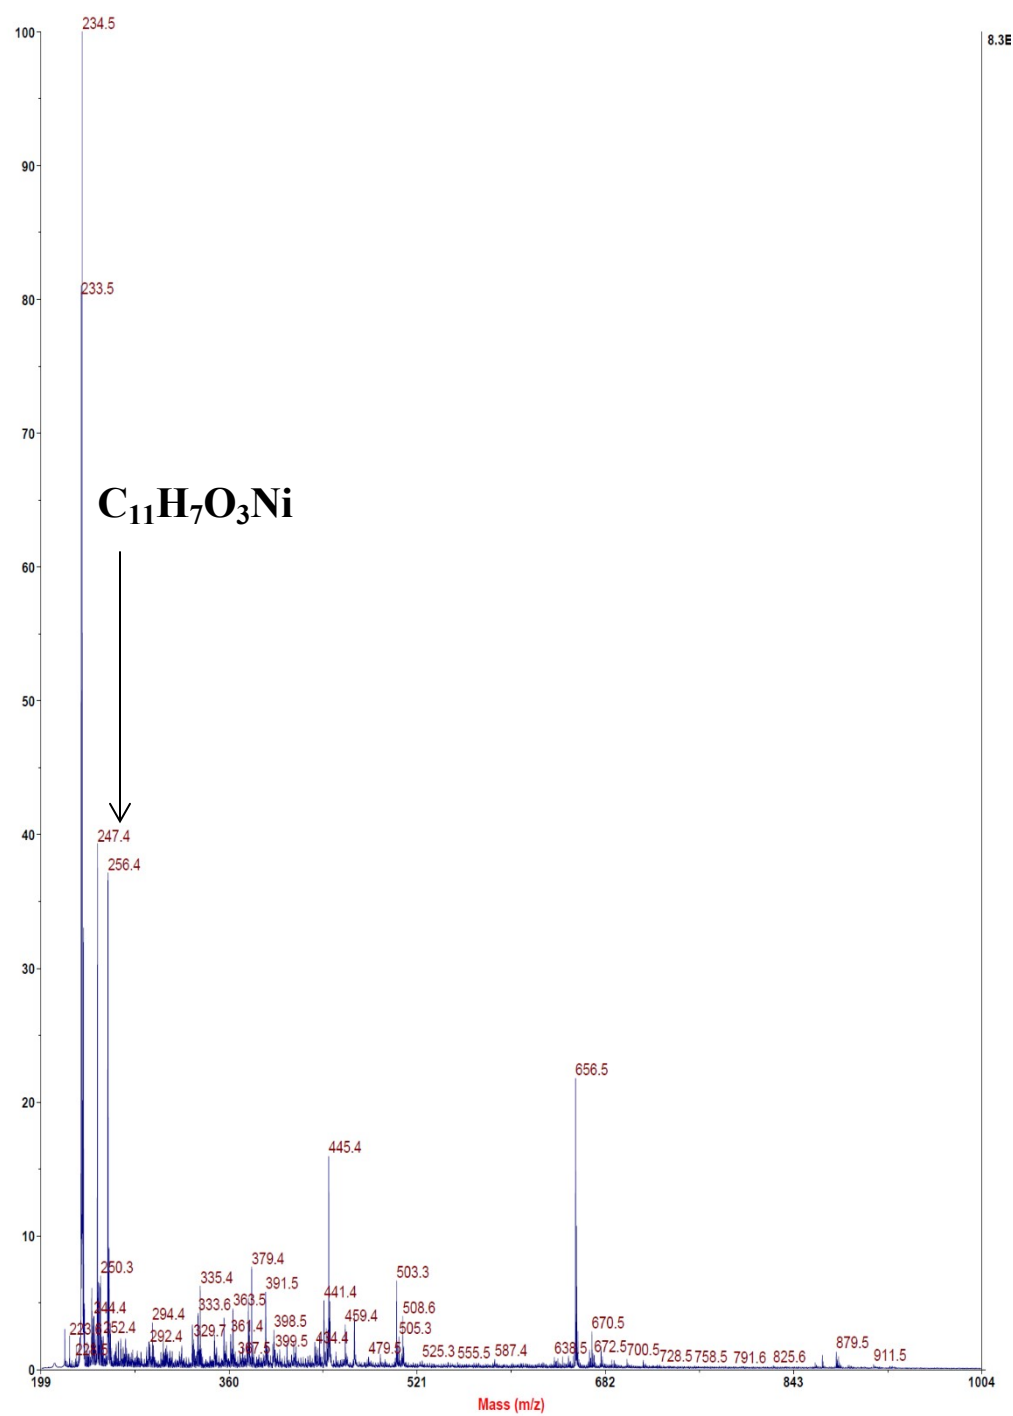

**Figure S9.** MALDI-TOF spectrum of **3**.

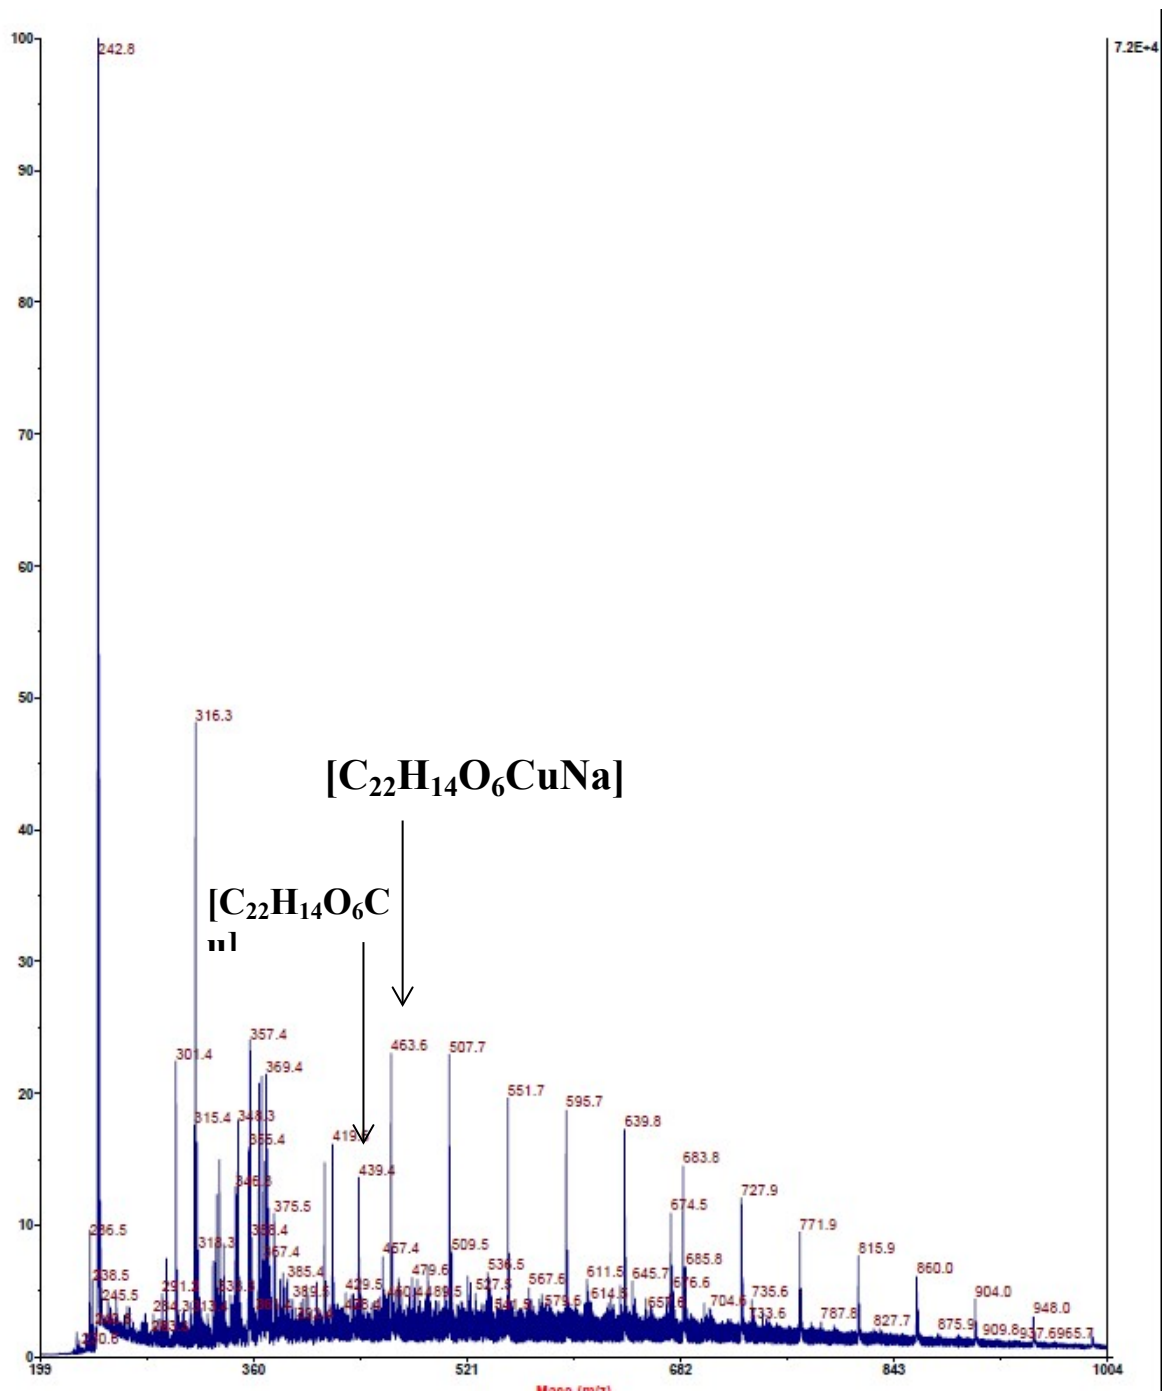

Figure S10. MALDI-TOF spectrum of 4.

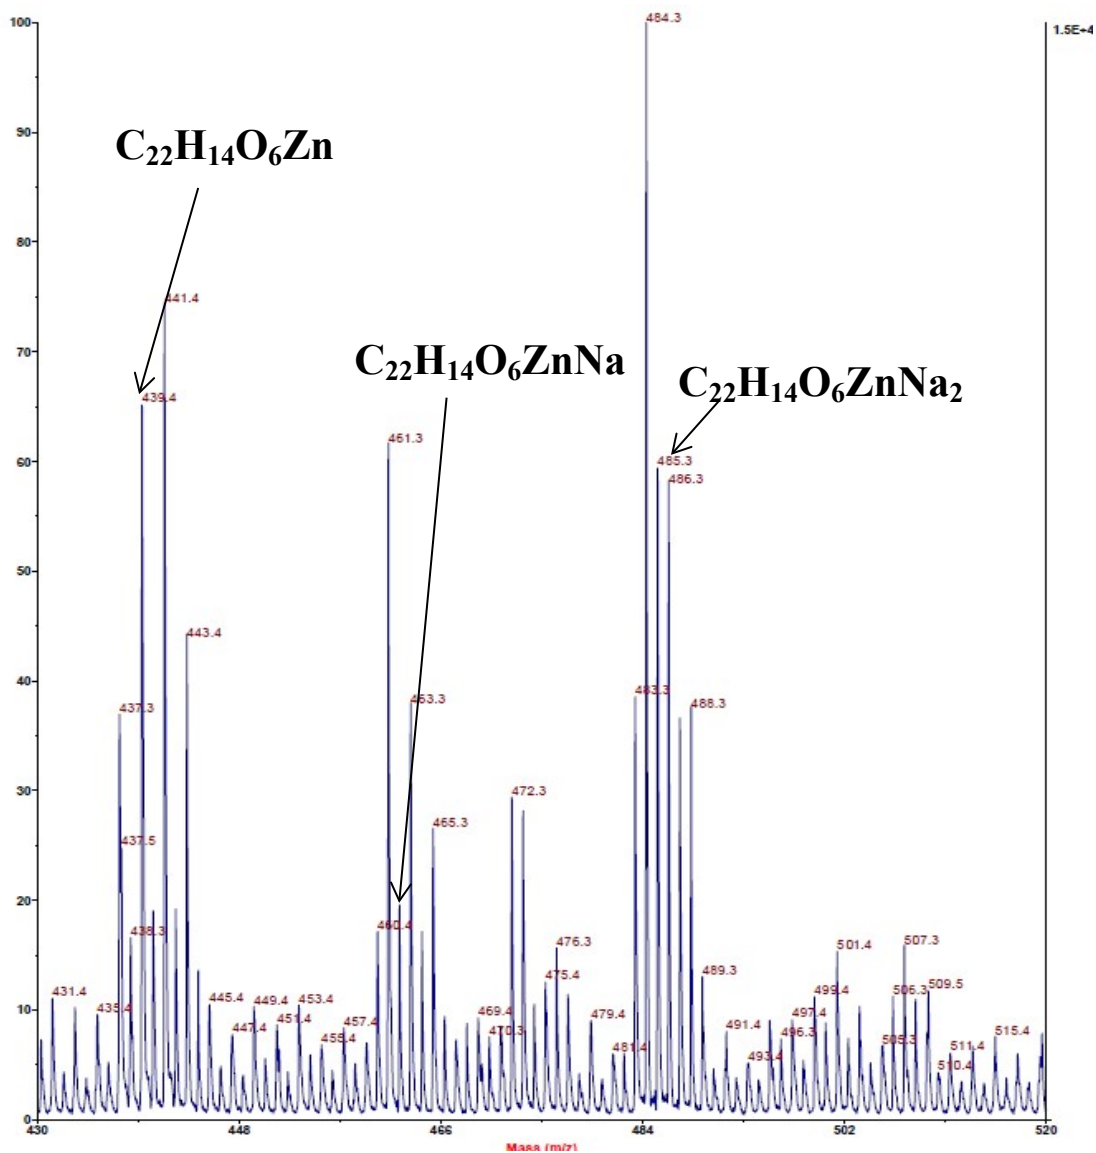

Figure S11. MALDI-TOF spectrum of 5.

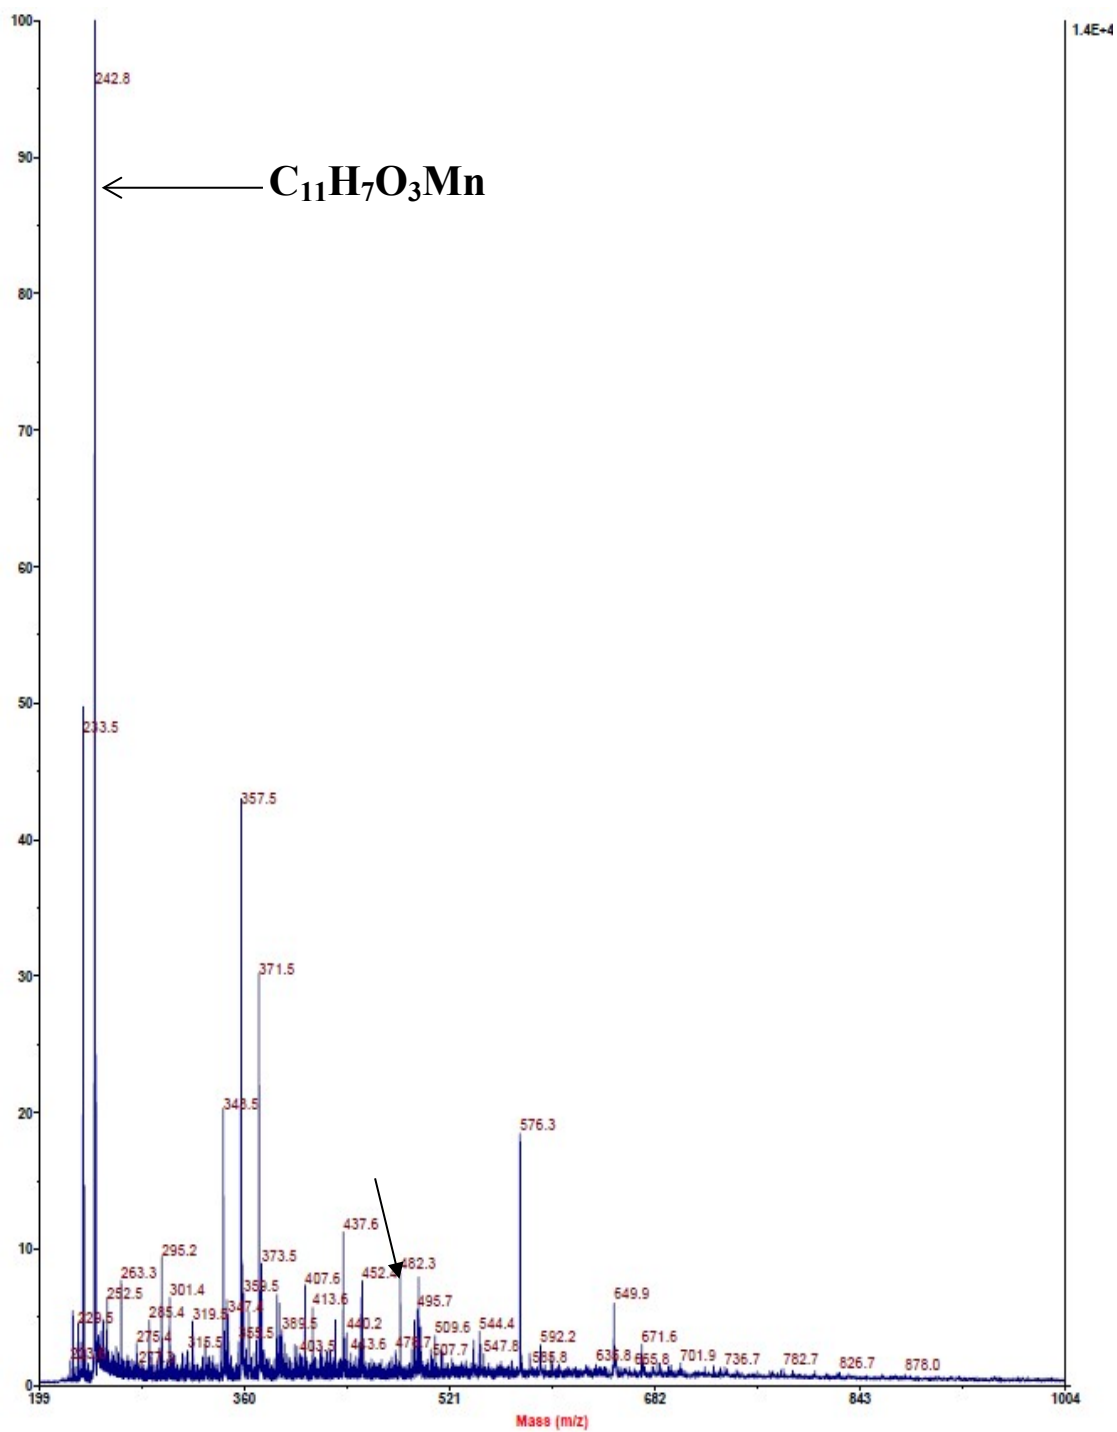

Figure S12. MALDI-TOF spectrum of 1A.

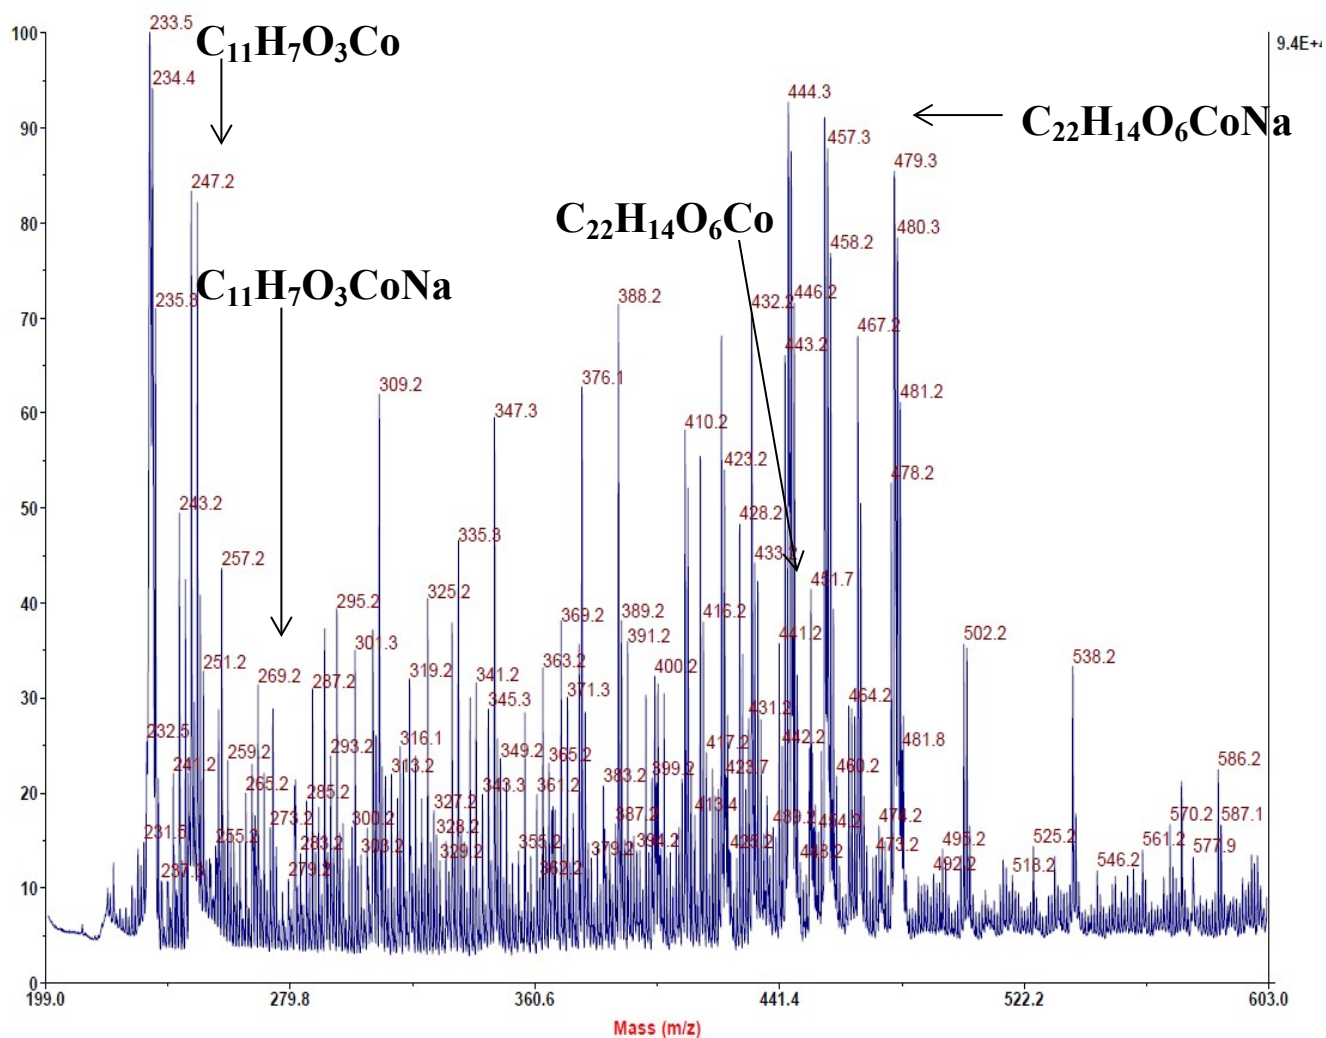

Figure S13. MALDI-TOF spectrum of 2A.

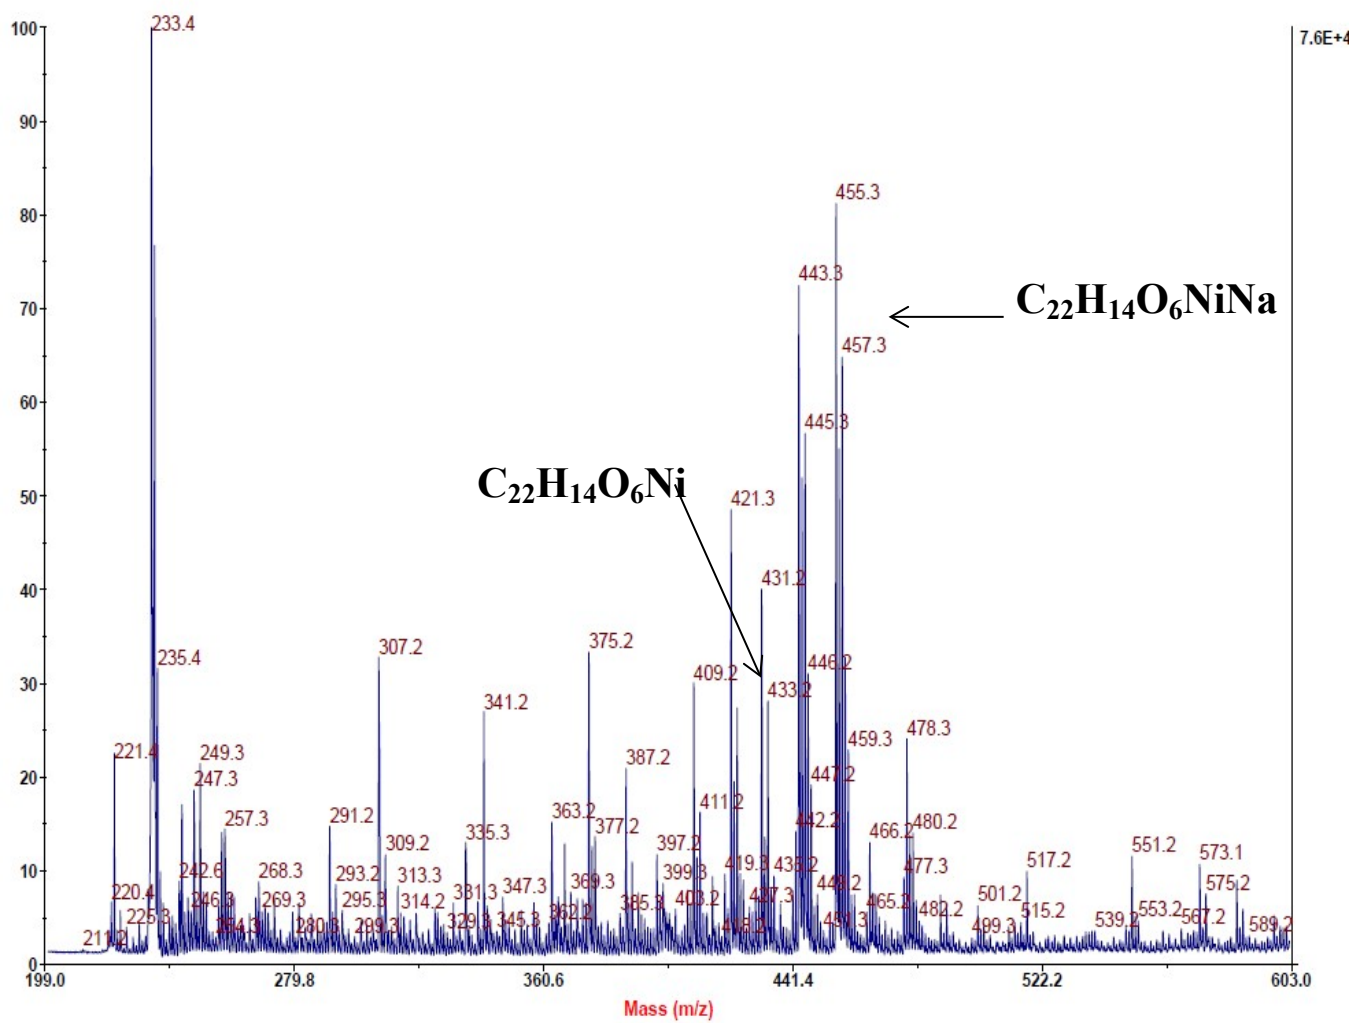

Figure S14. MALDI-TOF spectrum of 3A.



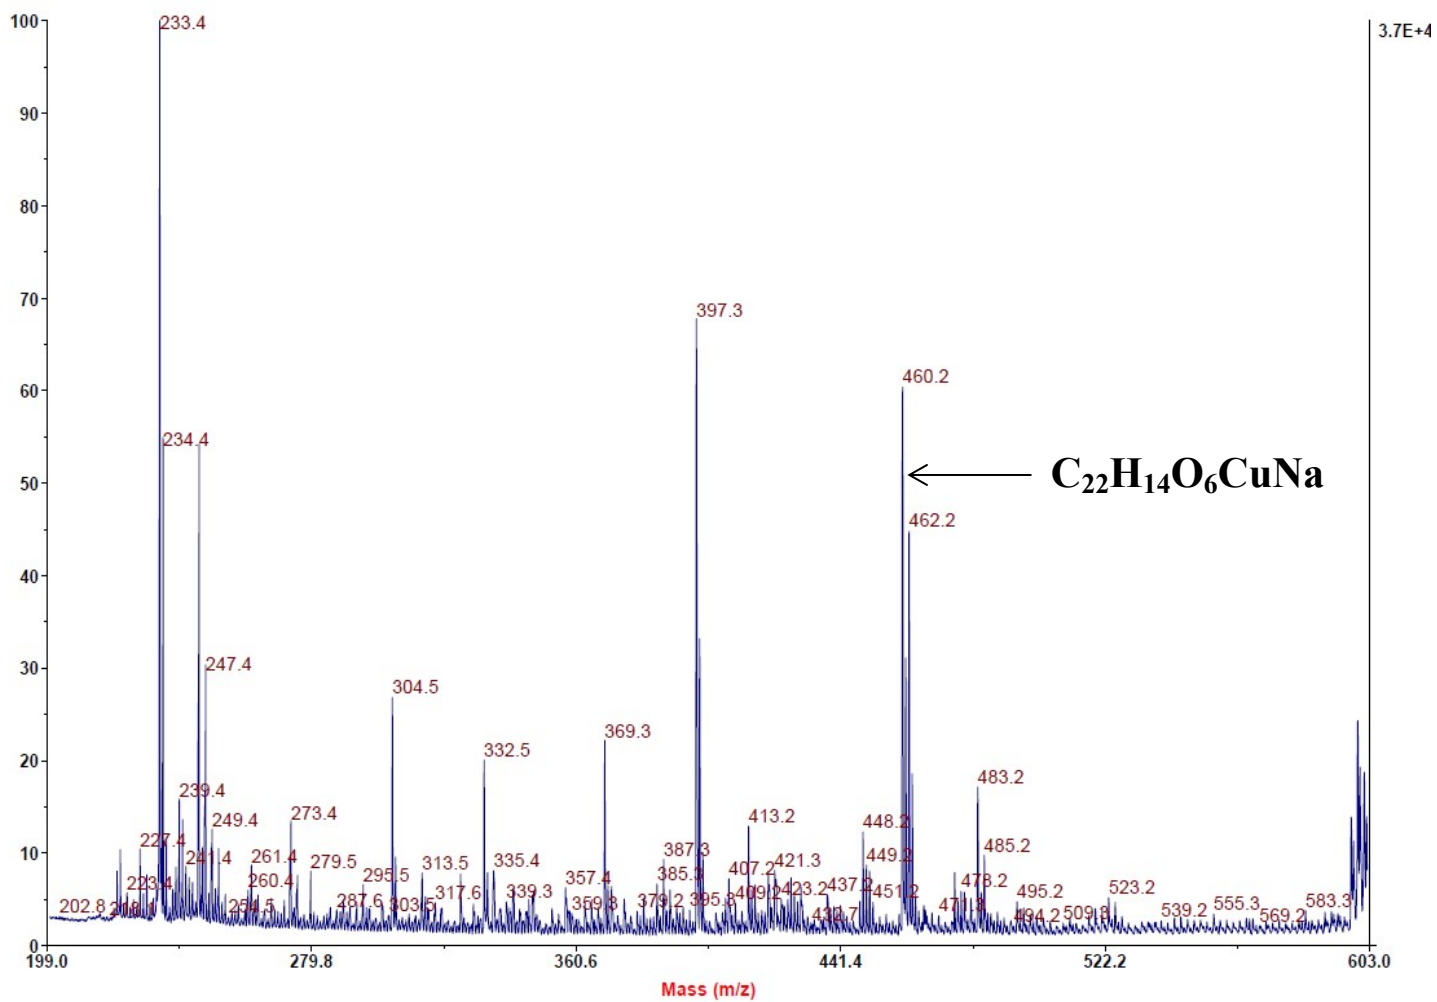

Figure S15. MALDI-TOF spectrum of 4A.

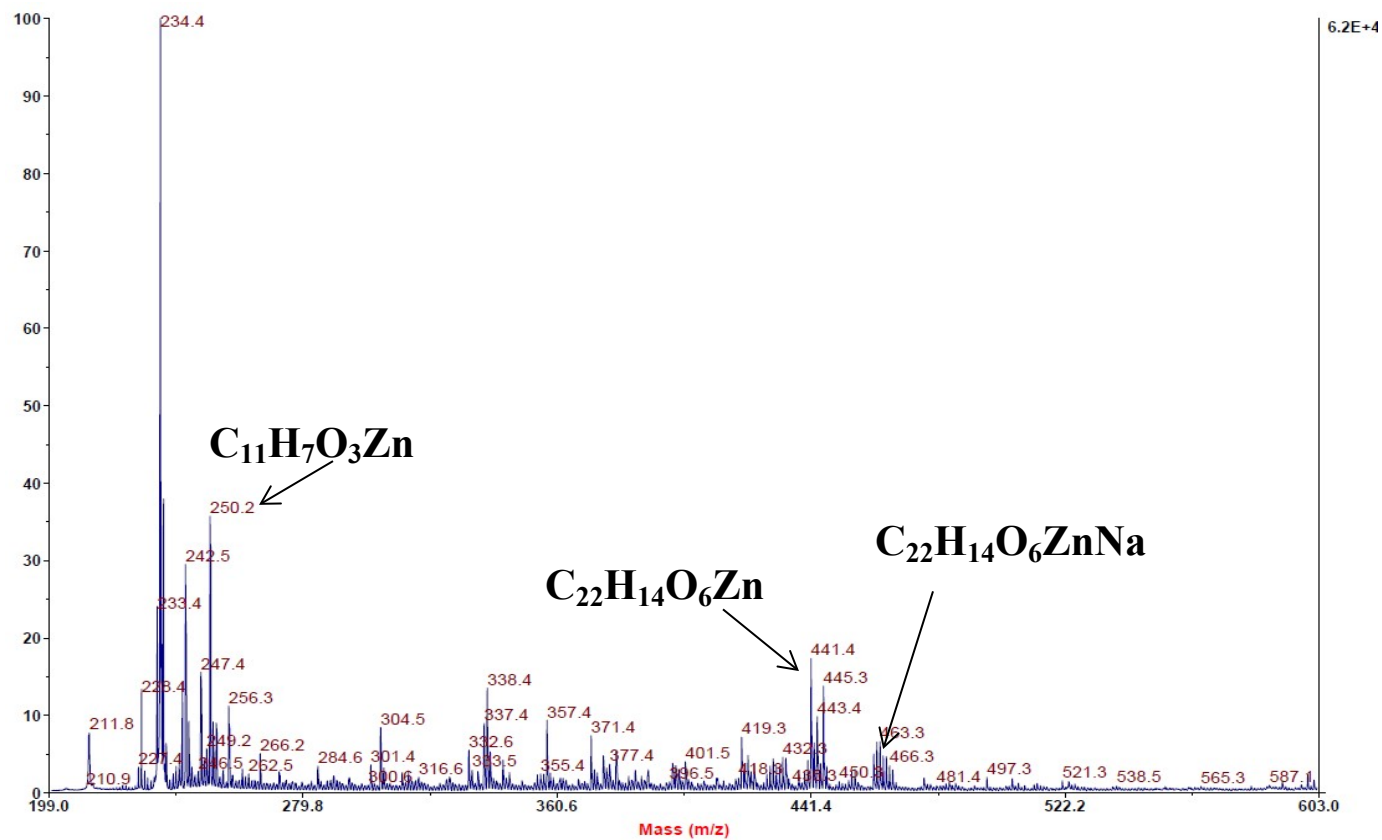

Figure S16. MALDI-TOF spectrum of 5A.

a)

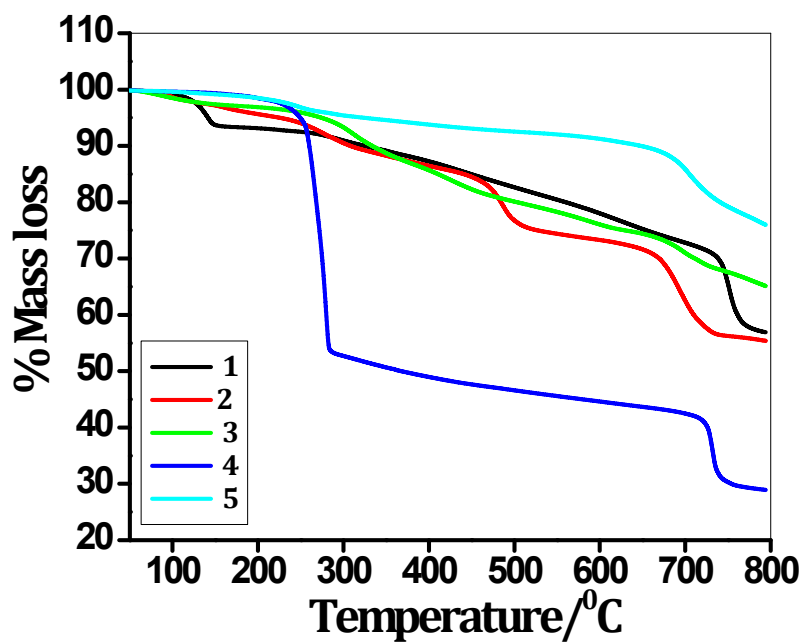

b)

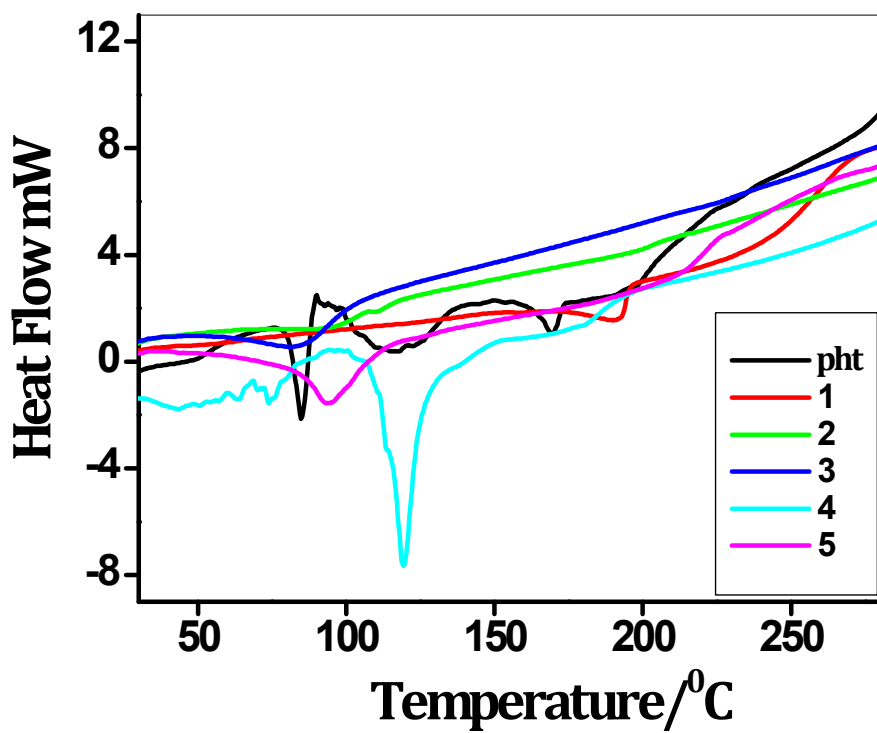

Figure S17. a) Thermograms of complexes 1 to 5, b) DSC plots for complexes 1 to 5.

a)

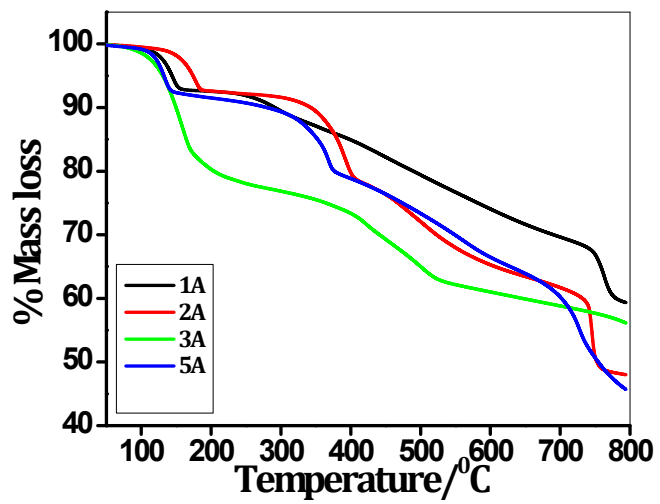

b)

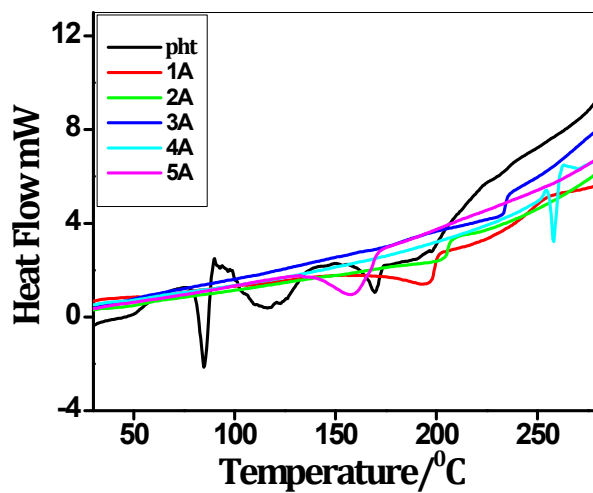

**Figure S18.** a) Thermograms of complexes 1A to 5A, b) DSC plots for complexes 1A to 5A.

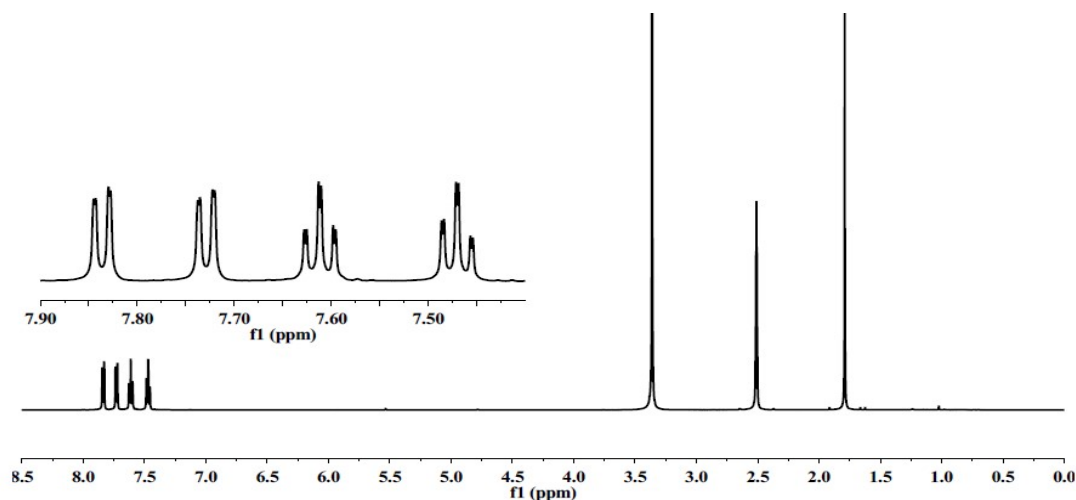

**Figure S19.**  $^1\text{H}$  and  $^{13}\text{C}$  NMR of **Na(pht)** in  $\text{DMSO-}d_6$ .

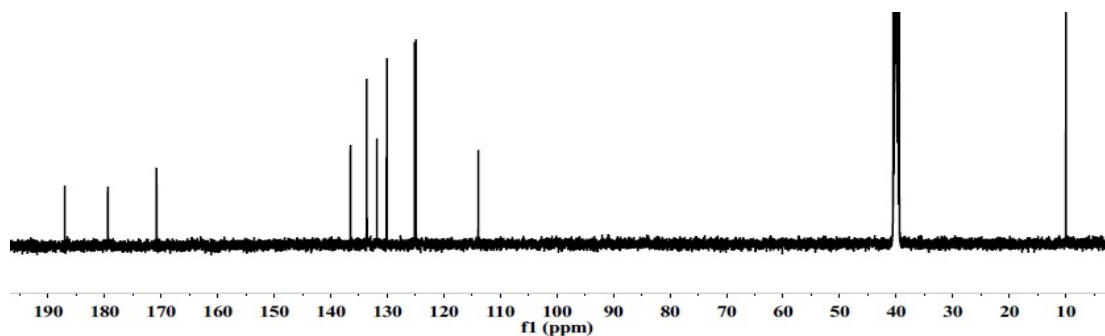

**Figure S20.**  $^1\text{H}$  and  $^{13}\text{C}$  NMR of **Na(pht)** in  $\text{DMSO-}d_6$ .

$^1\text{H}$  NMR spectrum of **(pht)** was recorded in  $\text{DMSO-}d_6$  (Fig.S19 ESI†). There was six proton resonance observed for free phthiocol ligand. The two singlets, C(2)–O.H. at  $\delta = \sim 10.90$  and C(3)– $\text{CH}_3$  at  $\delta = \sim 1.95$  (Table 1), substituted group on the quinonoid ring. Two doublets for (C5)H and C(8)H, at  $\delta = \sim 7.96$  and 7.82, two triplets for C(6)H and C(7)H, at  $\delta = \sim 7.98$  and 7.77 of benzenoid ring. The sodium complex **Na(pht)** shows five proton resonance peaks in the  $^1\text{H}$  NMR spectrum. One singlet for C(3)- $\text{CH}_3$  at  $\delta = \sim 1.79$ , two doublets for (C5)H and C(8)H at  $\delta = \sim 7.83$  and 7.72, two triplet at  $\delta = \sim 7.61$  and 7.47. All chemical shifts of protons were observed upfield compared to the free phthiocol ligand.

**Table 1**  $^1\text{H}$  and  $^{13}\text{C}$  chemical shift for phthiocol and **Na(pht)**

| Type of Carbons/Protons | Ph $\delta_{\text{H}}$ | Na(pht) $\delta_{\text{H}}$ | Ph $\delta_{\text{C}}$ | Na(pht) $\delta_{\text{C}}$ |
|-------------------------|------------------------|-----------------------------|------------------------|-----------------------------|
| C(1)                    | ...                    | ...                         | 181                    | 178.57                      |
| C(2)-OH                 | 10.90                  | ...                         | 155                    | 170.44                      |
| C(3)                    | ...                    | ...                         | 120                    | 113.41                      |
| C(4)                    | ...                    | ...                         | 185                    | 185.97                      |
| C(5)                    | 7.79                   | 7.73                        | 126                    | 124.43                      |
| C(8)                    | 7.96                   | 7.84                        | 126                    | 125.59                      |
| C(6)                    | 7.77                   | 7.47                        | 134                    | 129.43                      |
| C(7)                    | 7.78                   | 7.73                        | 133                    | 136.12                      |
| C(9)                    | ...                    | ...                         | 130                    | 131.52                      |
| C(10)                   | ...                    | ...                         | 132                    | 132.07                      |
| -CH <sub>3</sub>        | 1.95                   | 1.79                        | 8.97                   | 9.54                        |

$^{13}\text{C}$  NMR of free phthiocol ligand and **Na(pht)** complex (Fig.S20 ESI<sup>†</sup>) shows eleven carbon resonances. The carbonyl carbon resonance C(1) = O (1) at  $\delta = \sim 178.57$  ppm and C(4) = O (4) at  $\delta = \sim 185.87$  ppm (4) observed for phthiocol ligand. The carbonyl carbon resonance C(1) = O (1) at  $\delta = \sim 179.41$  ppm and C(4) = O (4) at  $\delta = 187.02 \sim$  ppm observed downfield for **Na(pht)** as compared to phthiocol ligand. Because, non-bonded electron of carbonyl oxygen C(1) = O(1) and C(4) = O(4) donated electron to  $\text{Na}^+$  ion, becomes carbonyl moiety electron deficient. The C(2)-O(2) carbon resonance observed at  $\delta = \sim 155.83$  ppm for phthiocol ligand was observed at  $\delta = \sim 170.80$  ppm in **Na(pht)** complex. The carbon resonances of **Na(pht)**; C(5), C(6), C(7), C(8), C(9), C(10) shows upfield chemical shift as compared to phthiocol ligand.

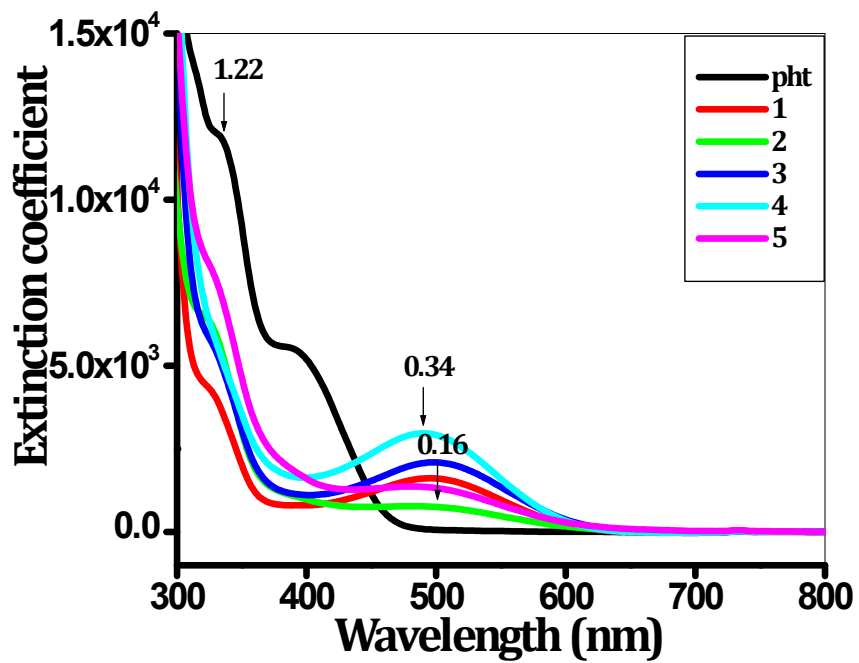

**Figure S21.** UV-Visible spectra of metal complexes of phtiocol in DMSO with concentration  $1 \times 10^{-4}$  M.

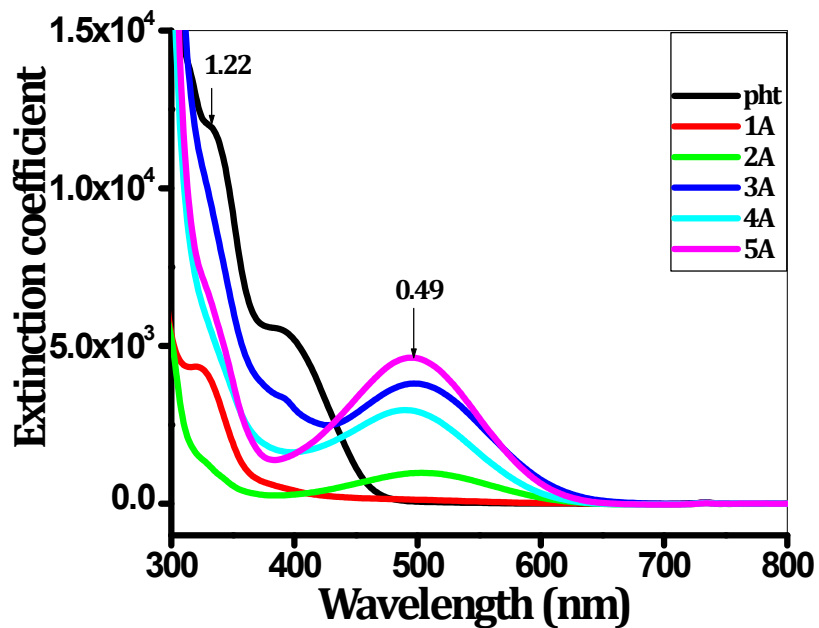

**Figure S22.** UV-Visible spectra of metal complexes of phthiocol in DMSO with concentration  $1 \times 10^{-4}$  M.

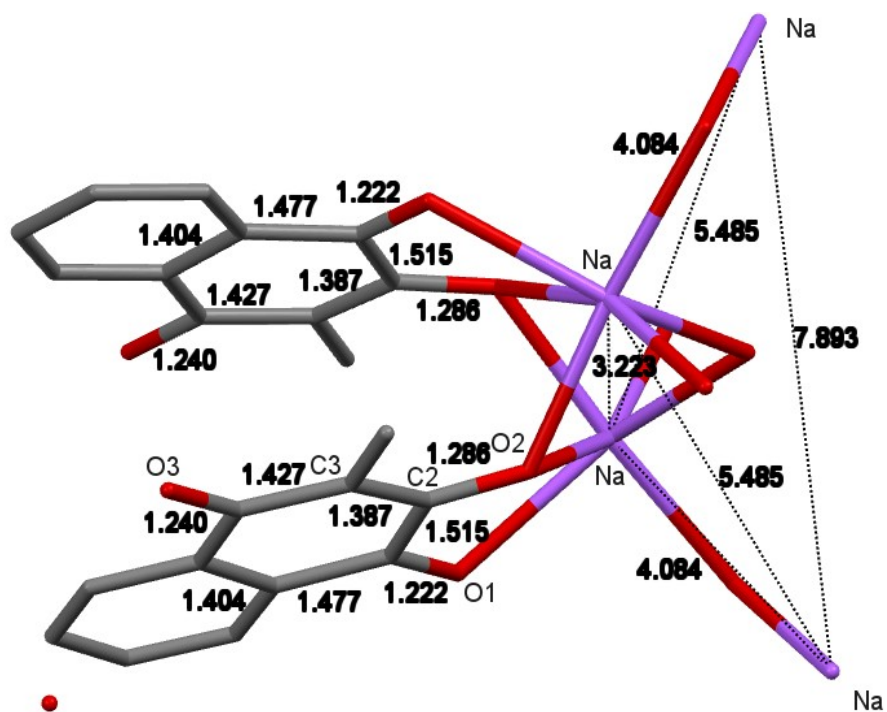

**Figure S23** Na-O bond distances as well as C=O bond distances of Na(pht).

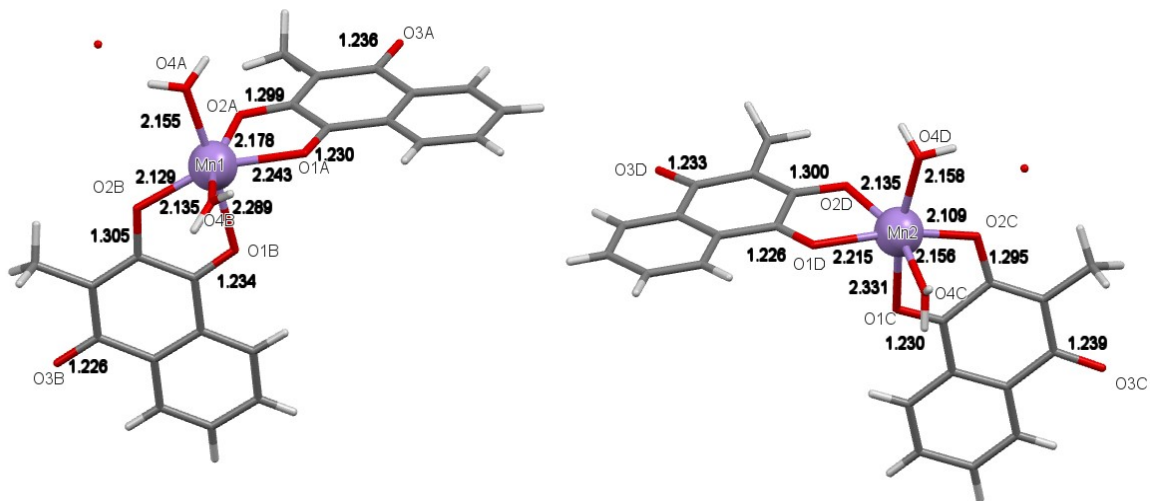



**Figure S24.** Important bond distances of **1** bond distances as well C=O bond.

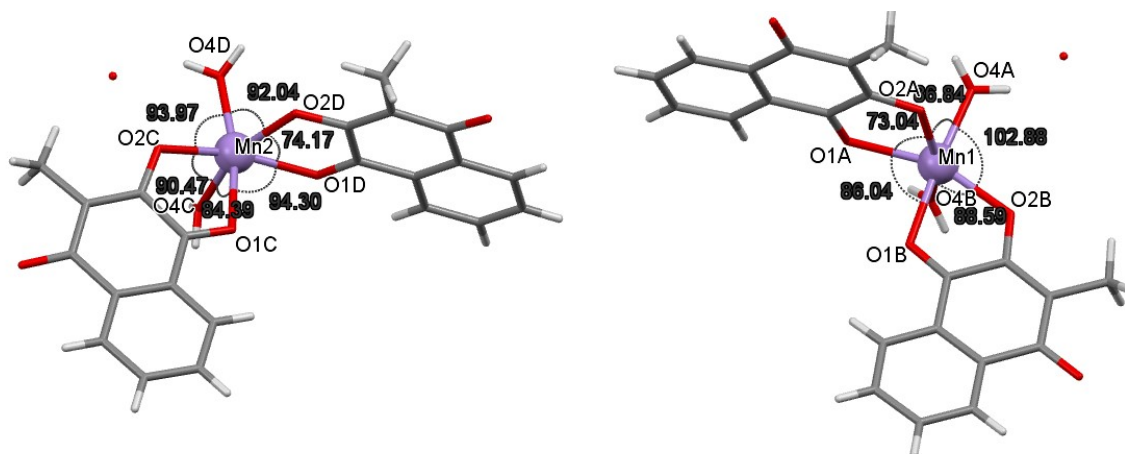

**Figure S25.** Bond angles around Mn(II) centers of asymmetric unit of **1**.

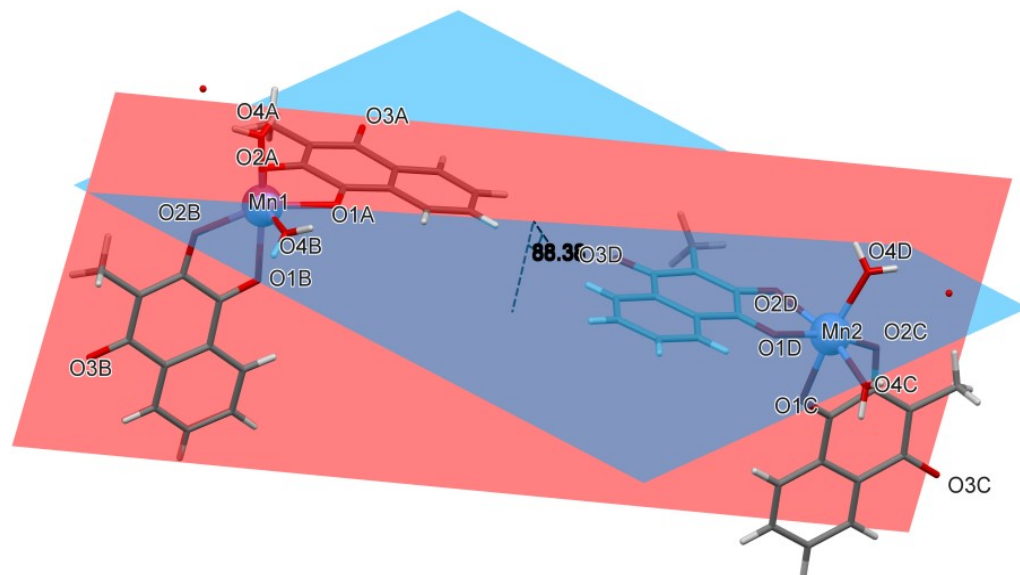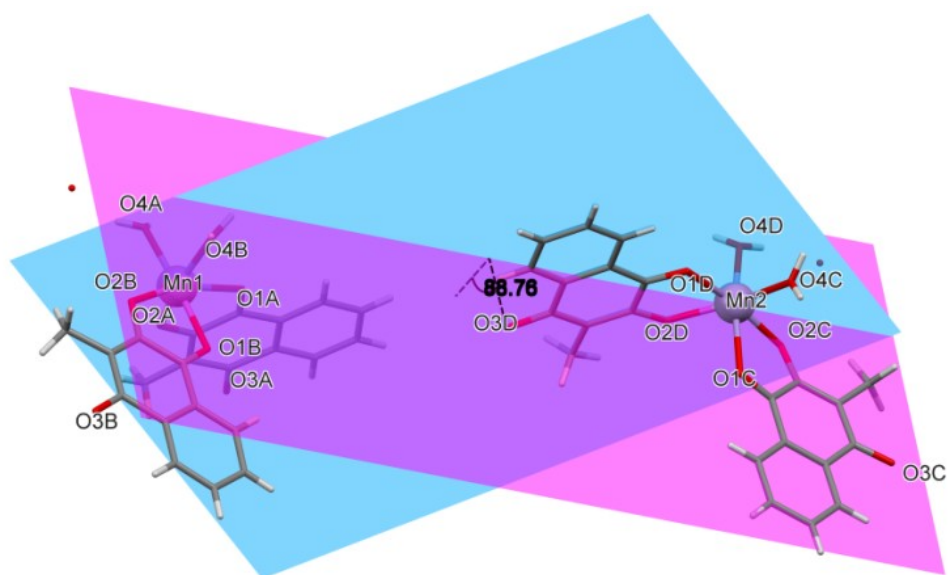

**Figure S26.** Interplanar angles of phthiocol ligands. Table Hydrogen bonding geometries of **1**.



## X-ray structure of complex **1B**

The crystals of complex **1** are also obtained as a coordinated methanol adduct in two independent syntheses, and it is designated as **1B**. Complex **1B** crystallizes in monoclinic space group  $P2_1/C$ . The coordination of two phthiocol ligands are *cis*, and oxygens of water and methanol molecules occupy the fourth and fifth coordination site around Mn(II). In addition, there is O-H $\cdots$ O hydrogen-bonded water molecule present in the lattice. Mn(II) is in a distorted octahedral environment of six oxygens. The phthiocol ligand bond angles are  $\angle O(2)\text{-Mn-O}(1)$  and  $\angle O(4)\text{-Mn-O}(5)$  are, respectively,  $72.5^\circ$  and  $72.9^\circ$  (Fig.S28). These bond angles are lowered by  $\sim 1.5^\circ$  to *cis* complex **1**, and *trans* complex **1A** by  $\sim 3^\circ$ . The two phthiocol ligands are nonplanar to each other, and their plane makes an angle of  $\sim 64^\circ$  (Fig.S29). The Mn-O bond distances around Mn(II) are all different. Mn-O (H<sub>2</sub>O and phenolic carbonyl) is  $\sim 2.15$  Å, Mn-O (MeOH and phenolic carbonyl) is  $\sim 2.10$  Å, whereas the Mn-O (quinonoid carbonyl) is longer with  $\sim 2.30$  Å. The quinonoid carbonyl bond distances in **1B**, observed for quinonoid carbonyls; C(13)-O(5) is  $\sim 1.24$  Å, and C(9)-O(3) is  $\sim 1.25$  Å, this suggests the ligands coordinate to Mn(II) in reduced form, i.e., naphthosemiquinone form<sup>50, 51</sup> (Fig.S30). Each molecule of **1B** is in the vicinity of four similar molecules through the O-H $\cdots$ O and  $\pi$ - $\pi$  stacking interactions (Fig.S31). Molecules are joined by O-H $\cdots$ O interaction by the lattice water molecule to form a polymer-like chain. Two such neighboring chains were connected by  $\pi$ - $\pi$  stacking interaction, as presented in Fig.S32.

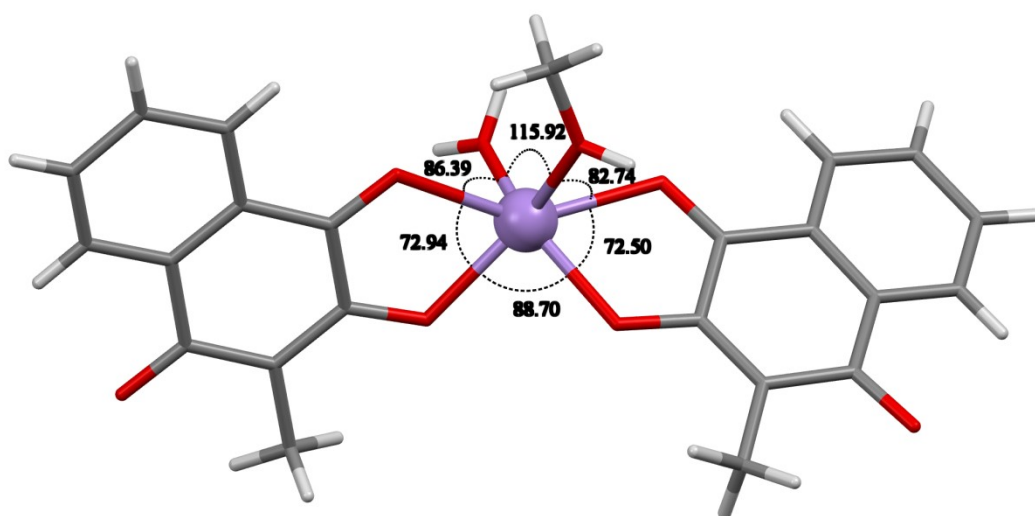

**Figure S28.** Bond angles around Mn(II) of **1B**.

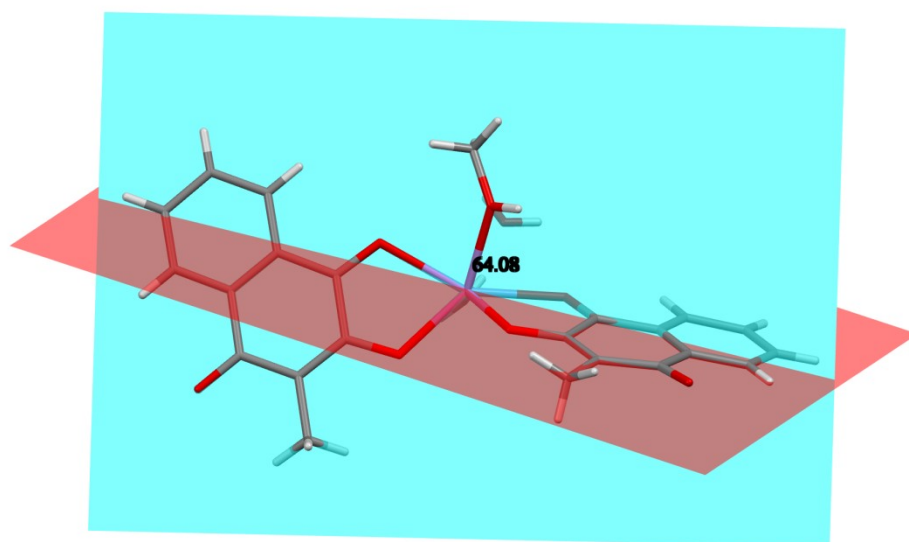

**Figure S29.** Plane of phthalocyanine ligands and interplanar angle in **1B**.

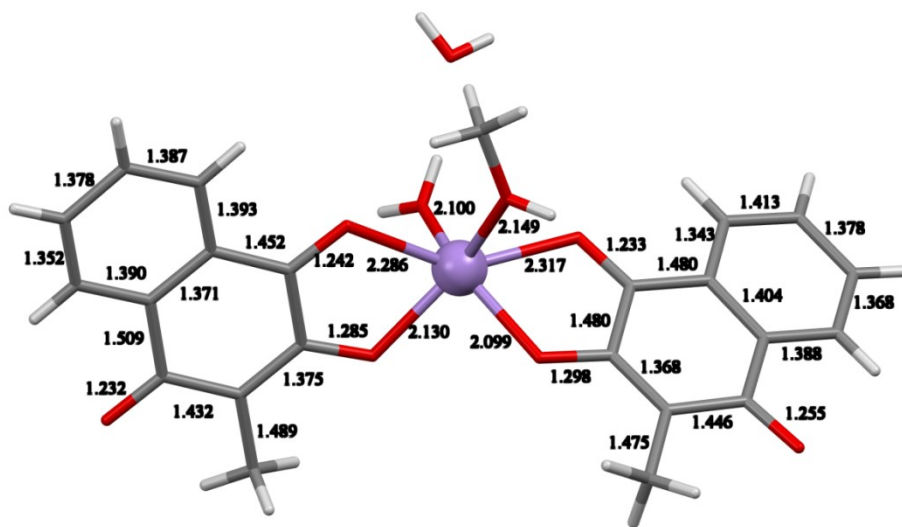

**Figure S30.** Bond distances of **1B**.

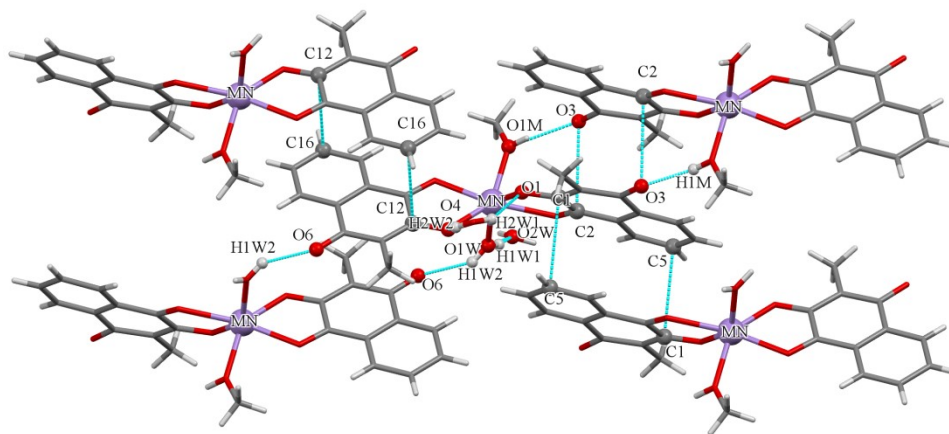

**Figure S31.** Neighbouring molecules of **1B**, O-H $\cdots$ O hydrogen bonding interaction and  $\pi$ - $\pi$  stacking interactions.

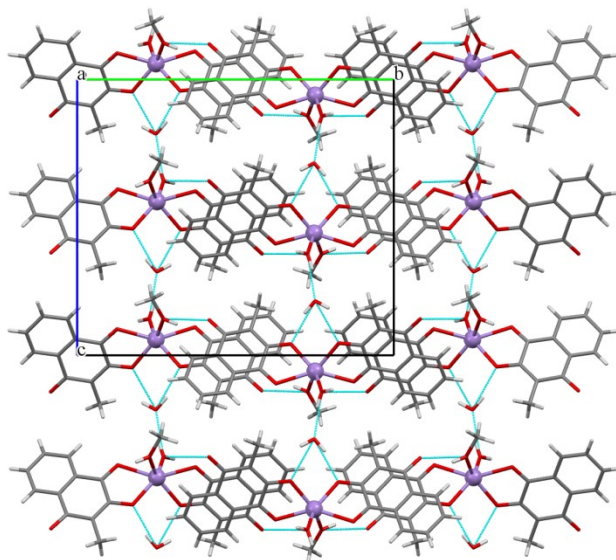

Fig.S32 Molecular packing of **1B** down a-axis.

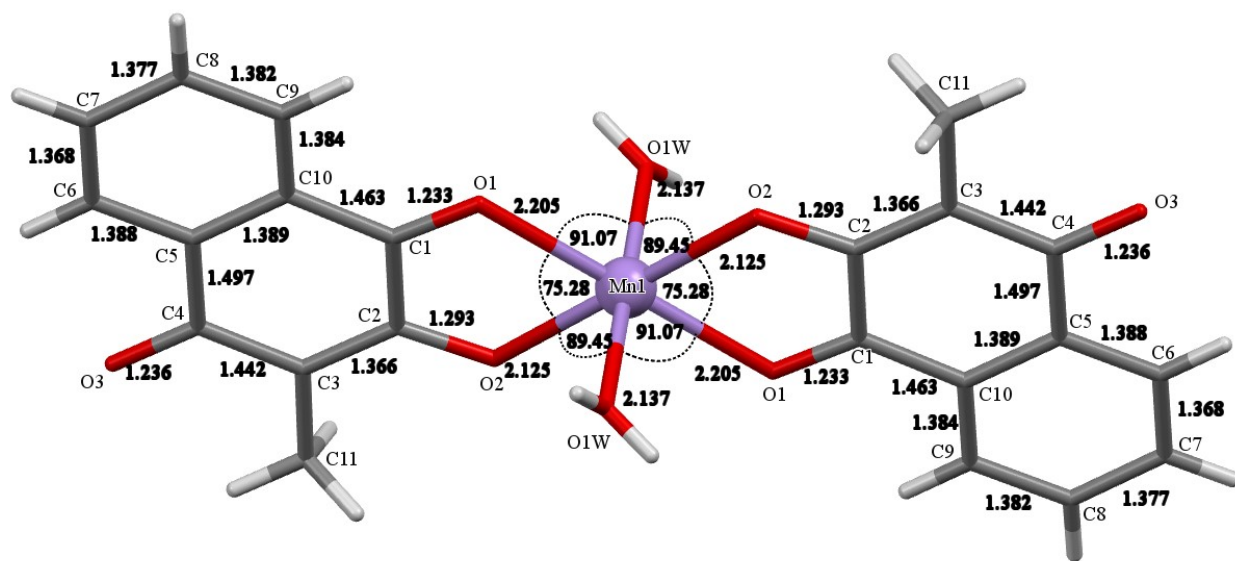

Figure S33. Bond distances and selected bond angles of **1A**.

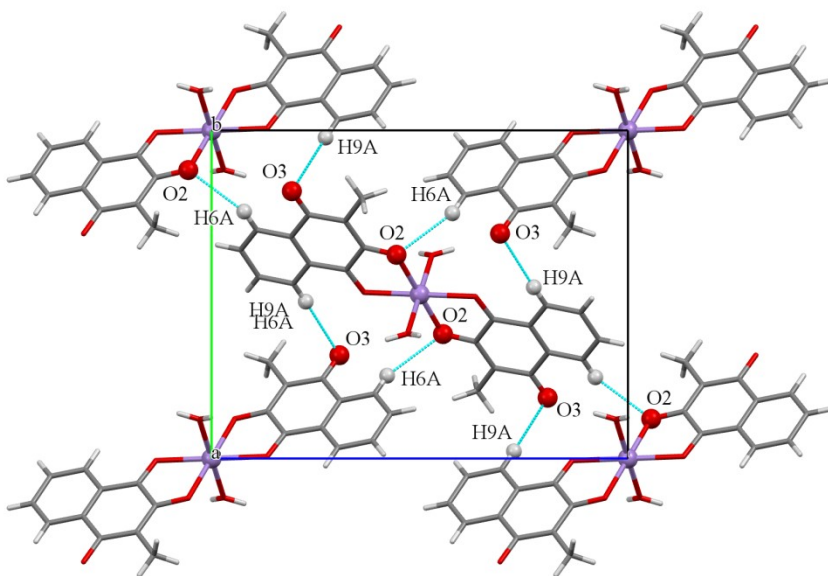

**Figure S34.** Molecular packing of **1A**.

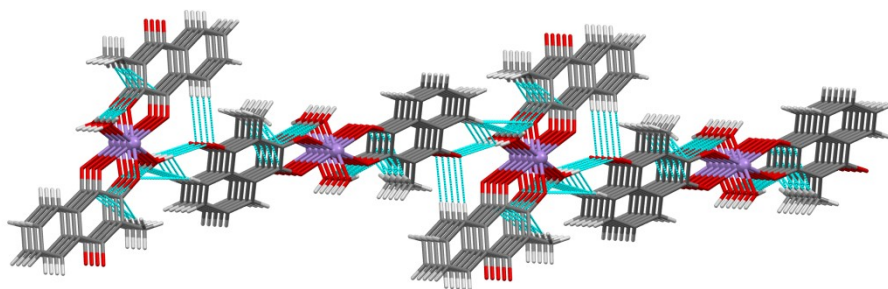

**Figure S35.** Polymeric chains of **1A** formed by O-H $\cdots$ O and connected through C-H $\cdots$ O and O-H $\cdots$ O interactions.

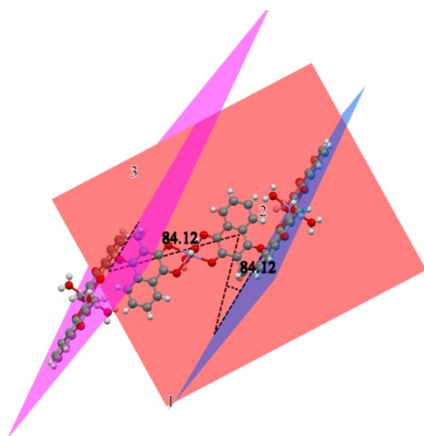

**Figure S36.** Molecular planes of **1A**. The orientations of polymeric chain are 84.12°.



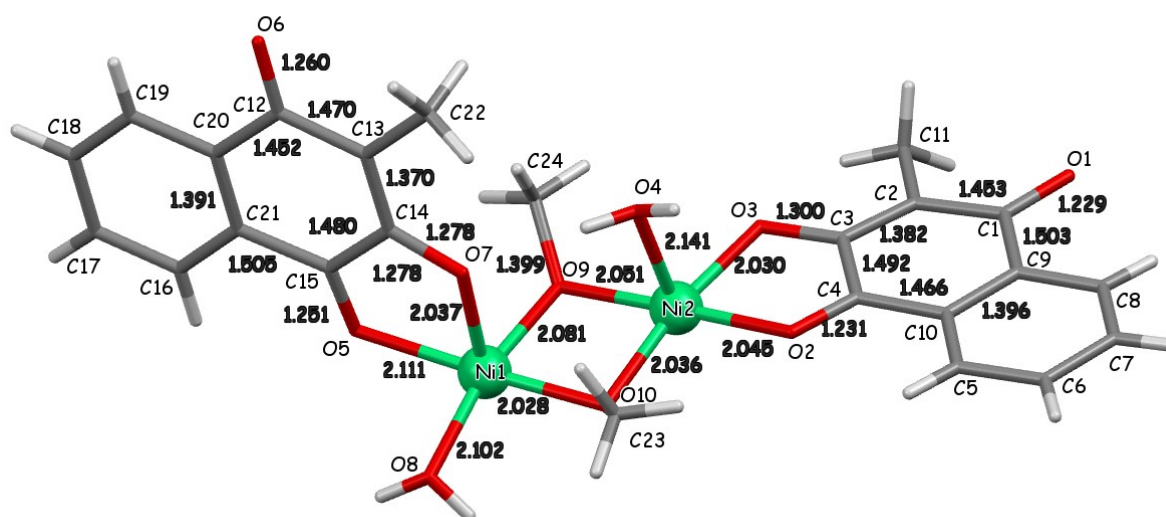

**Figure S37.** Selected bond distances of the asymmetric unit of complex **3**. Water molecules were removed for clarity.

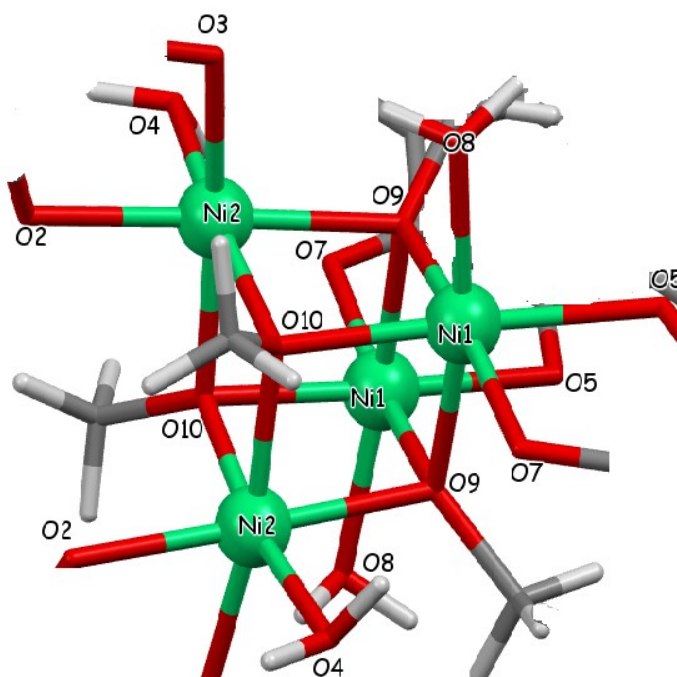

**Figure S38.** Cubane shaped arrangement of Ni(II) with bridged methoxy ligands.

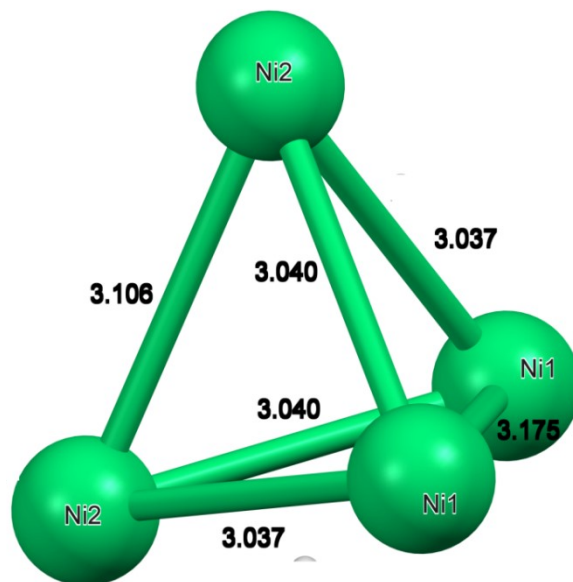

**Figure S39** Tetrahedral arrangement of Ni(II) ions and Ni(II)···Ni(II) bond distances in **3**.

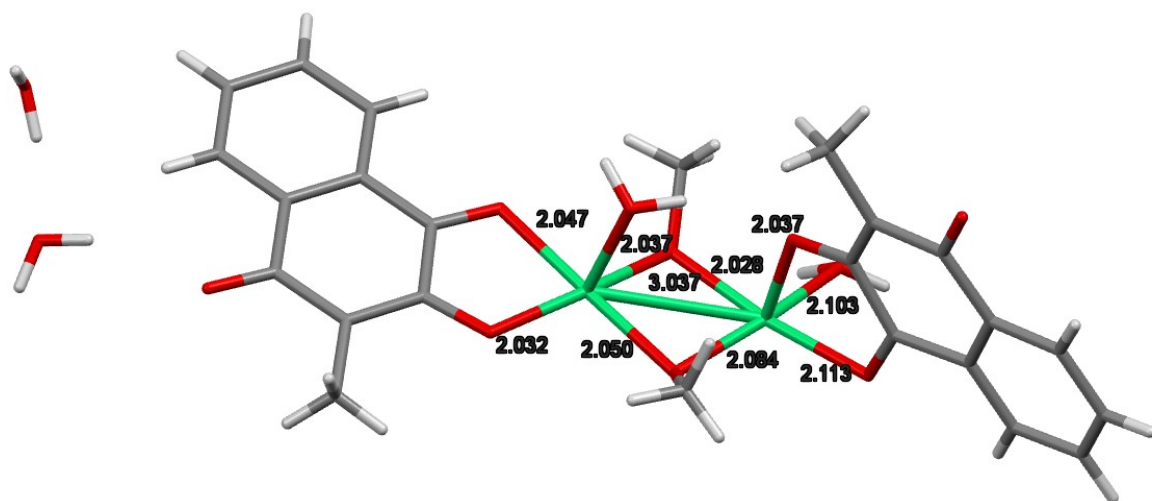

**Figure S40.** Ni-O bond distances of **3**.

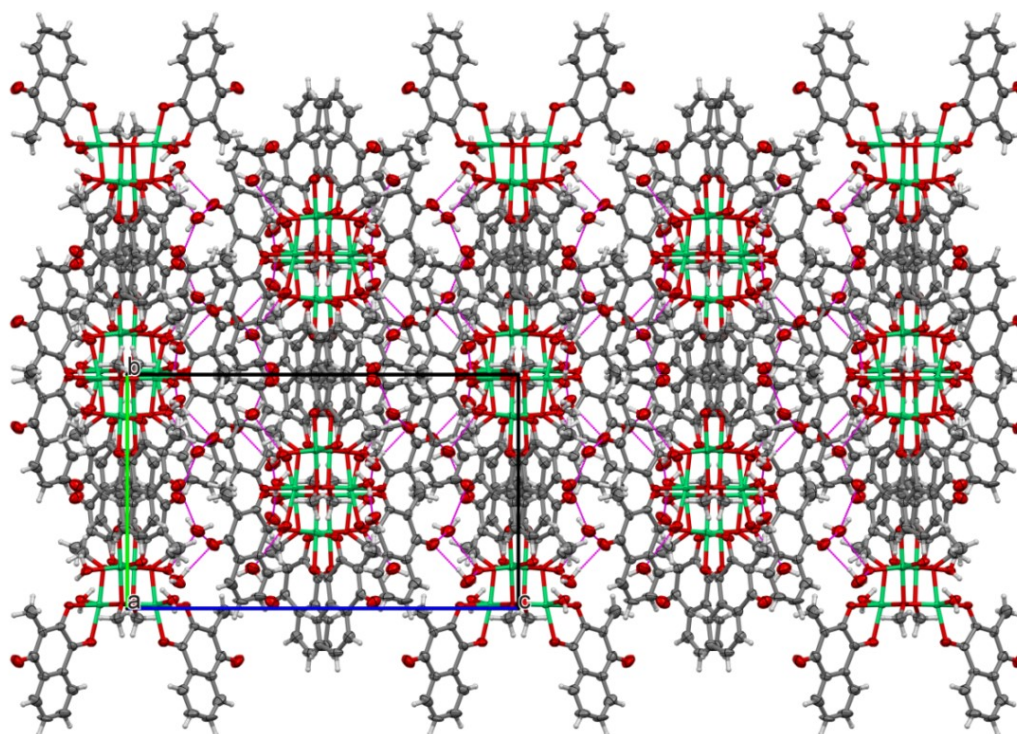

**Figure S41.** Molecular packing showing hydrogen bonding of quinonoid oxygen with adsorbed water molecules down *c* axis of **3**.

a)

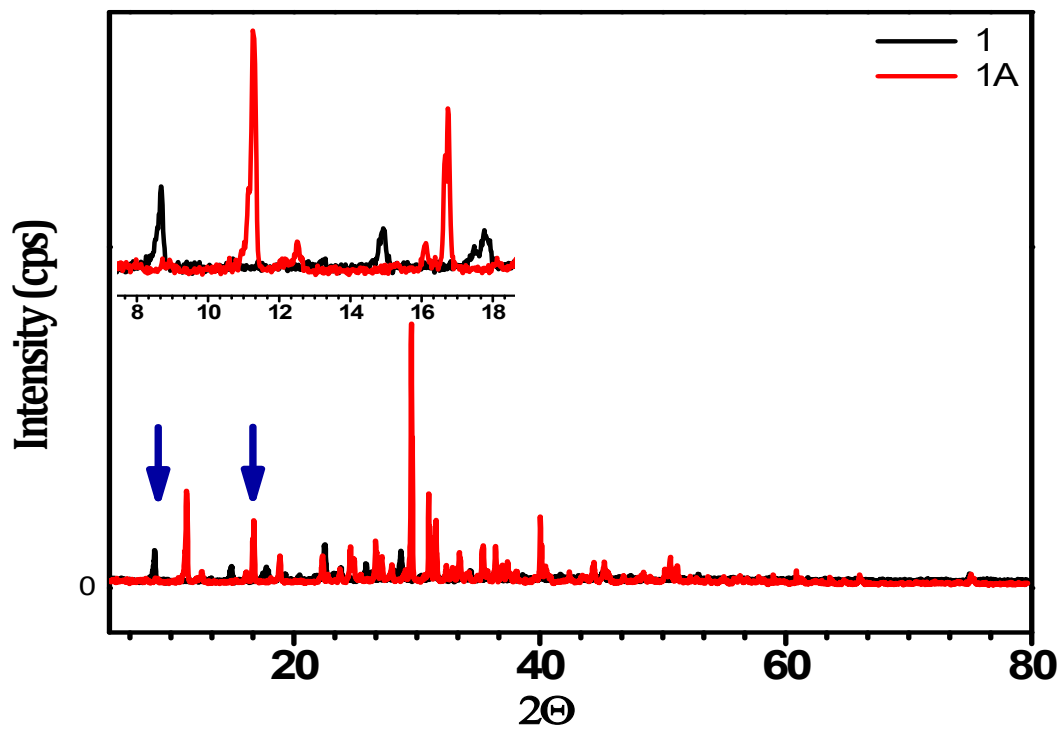

b)

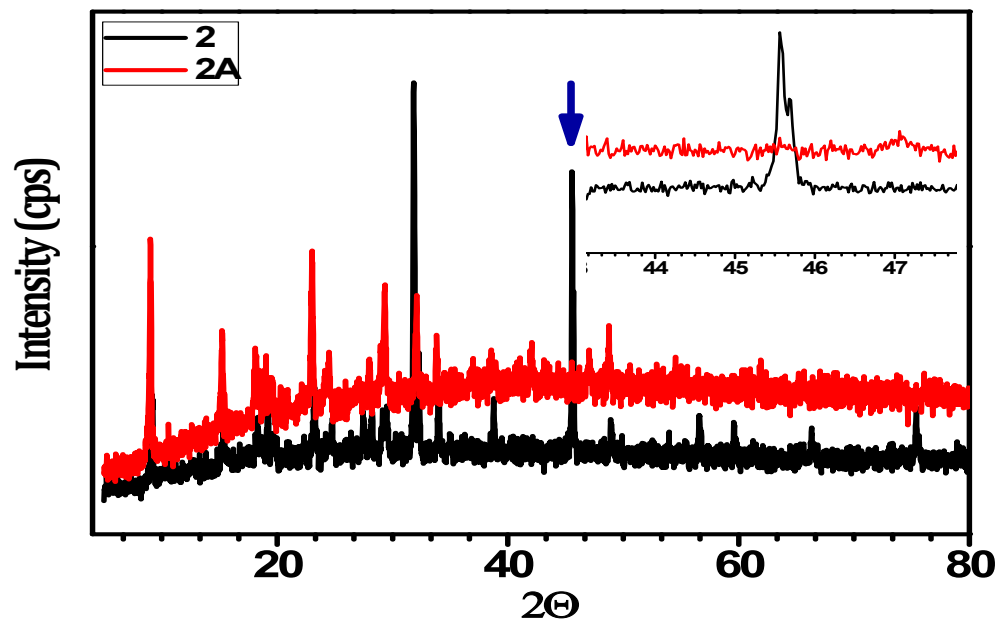

c)

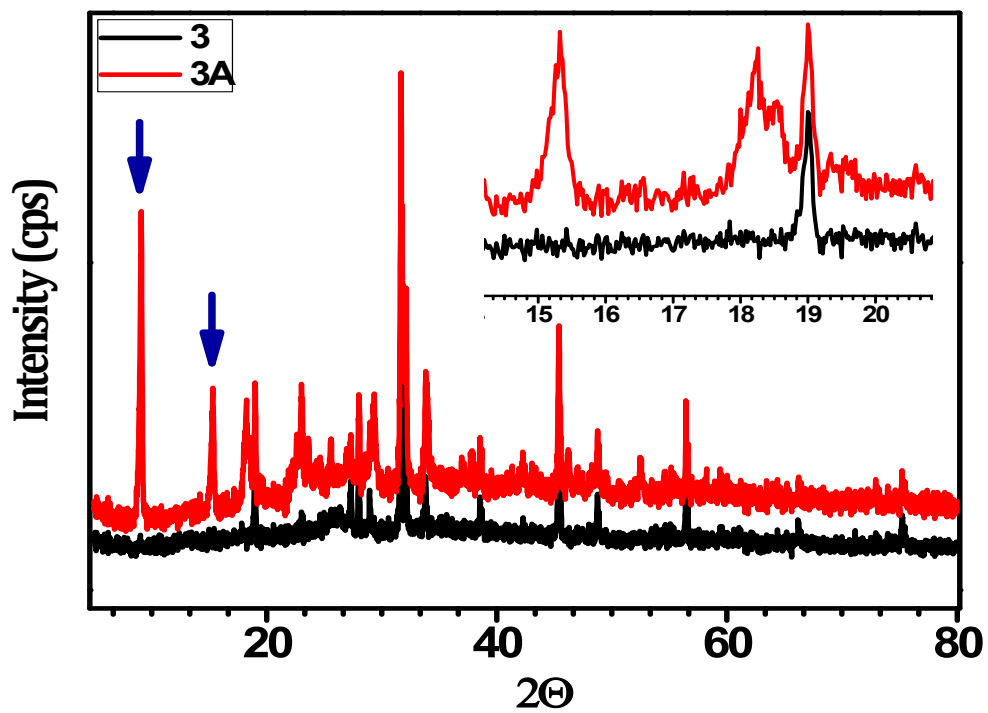

d)

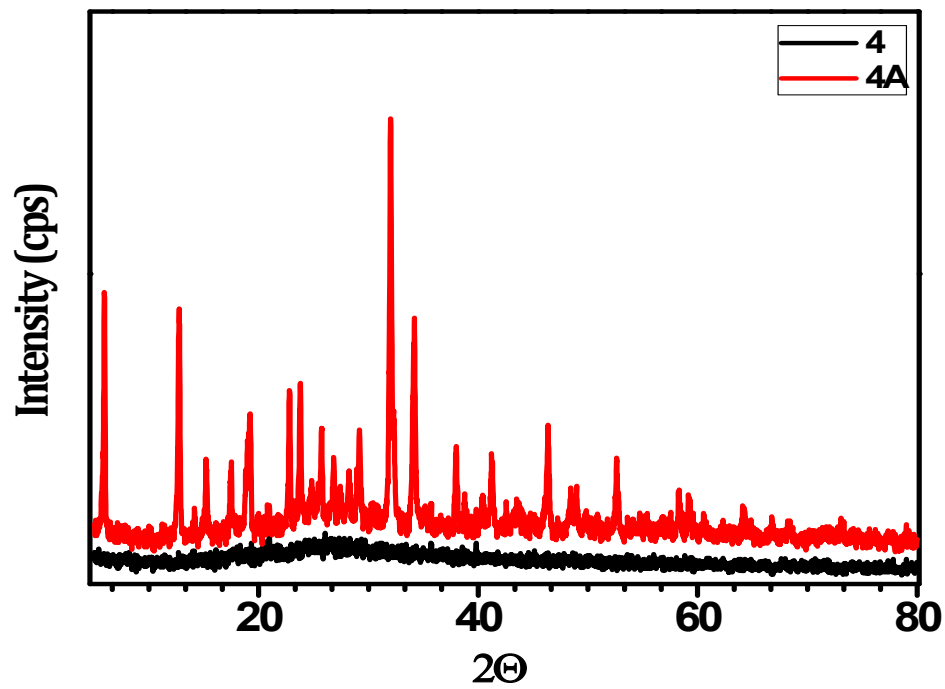

e)

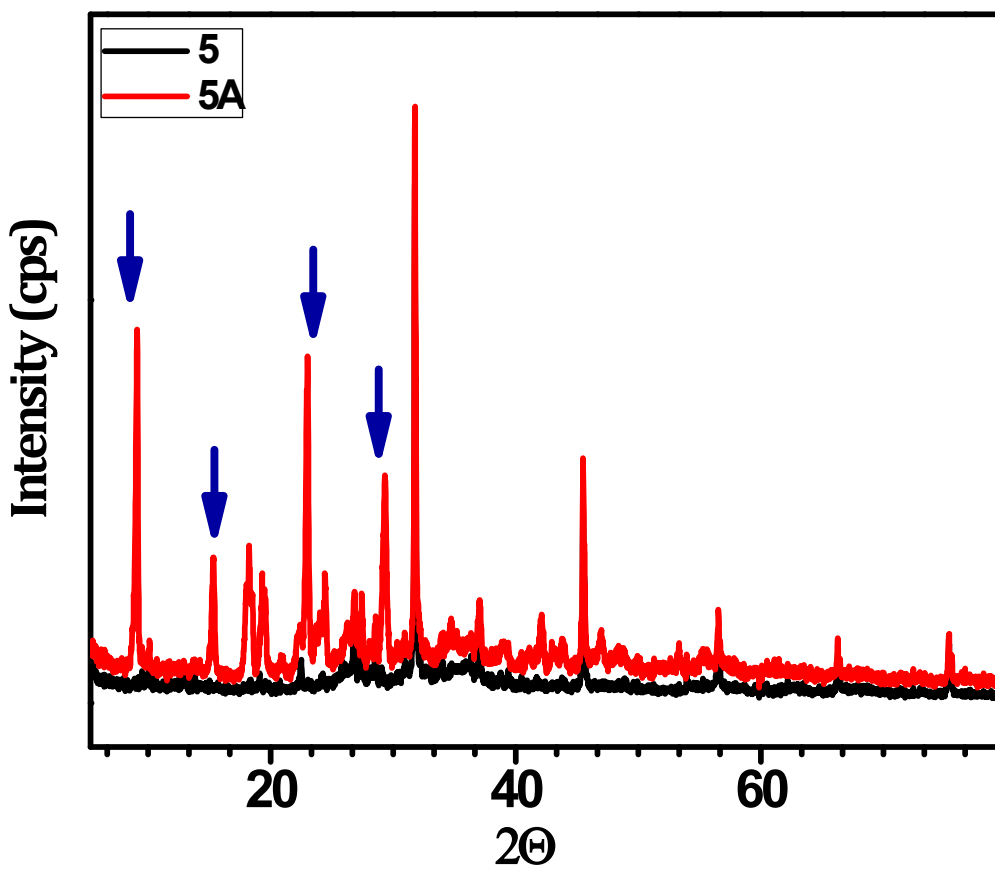

Figure S42. PXRD spectra of a) 1, 1A, b) 2, 2A, c) 3, 3A, d) 4, 4A, e) 5, 5A.

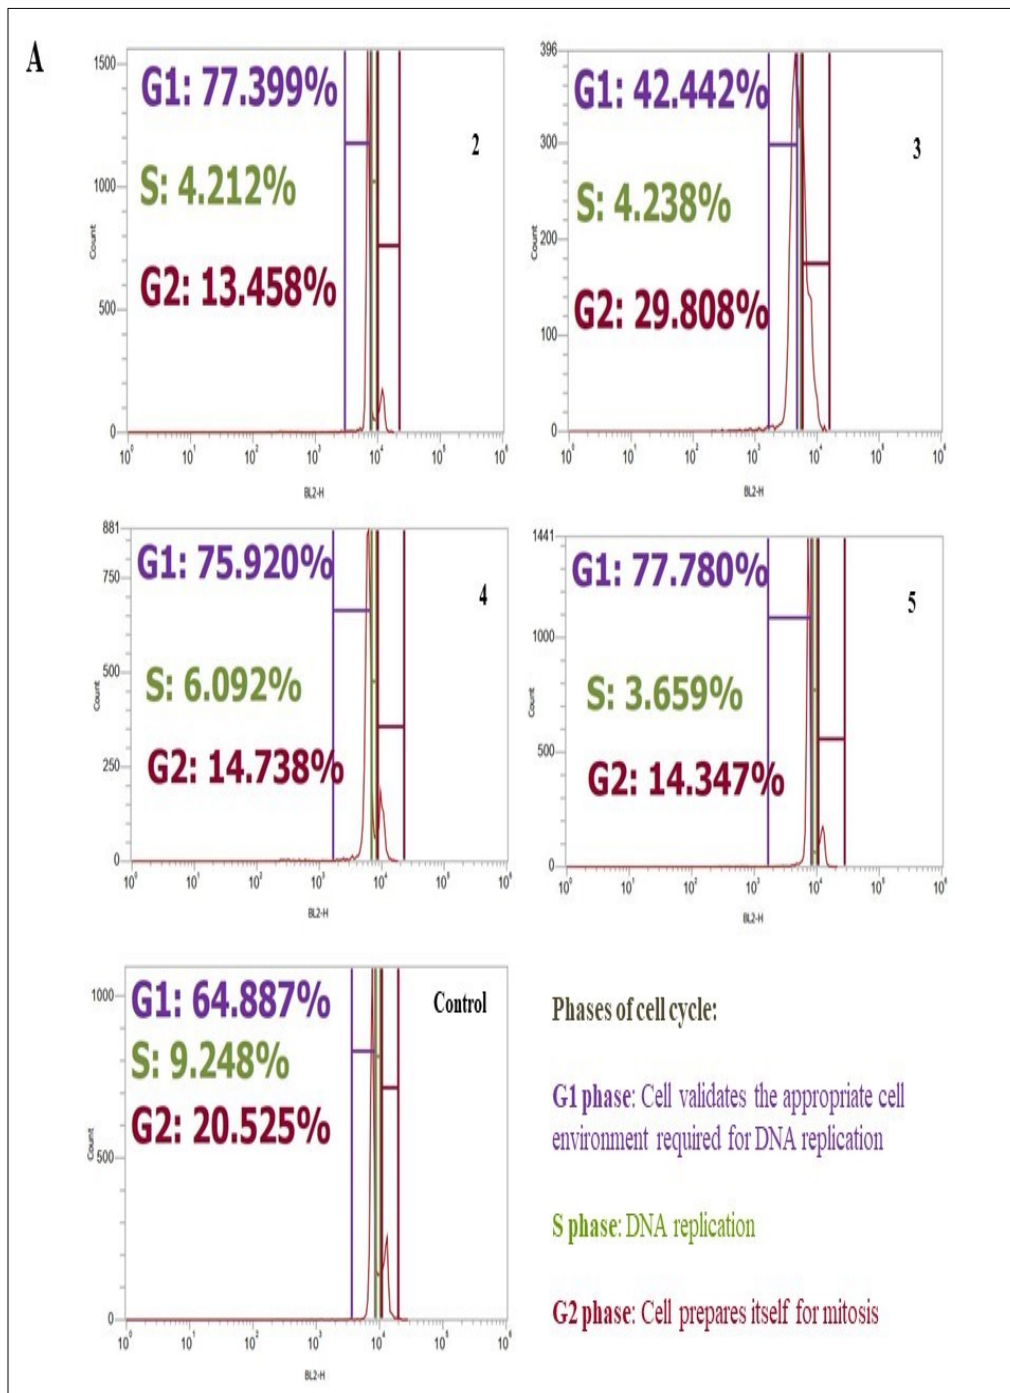

**Figure S43a.** Effect of the phthiocol complexes on cell cycle of A) MCF-7 cell lines at 30  $\mu$ M concentration.



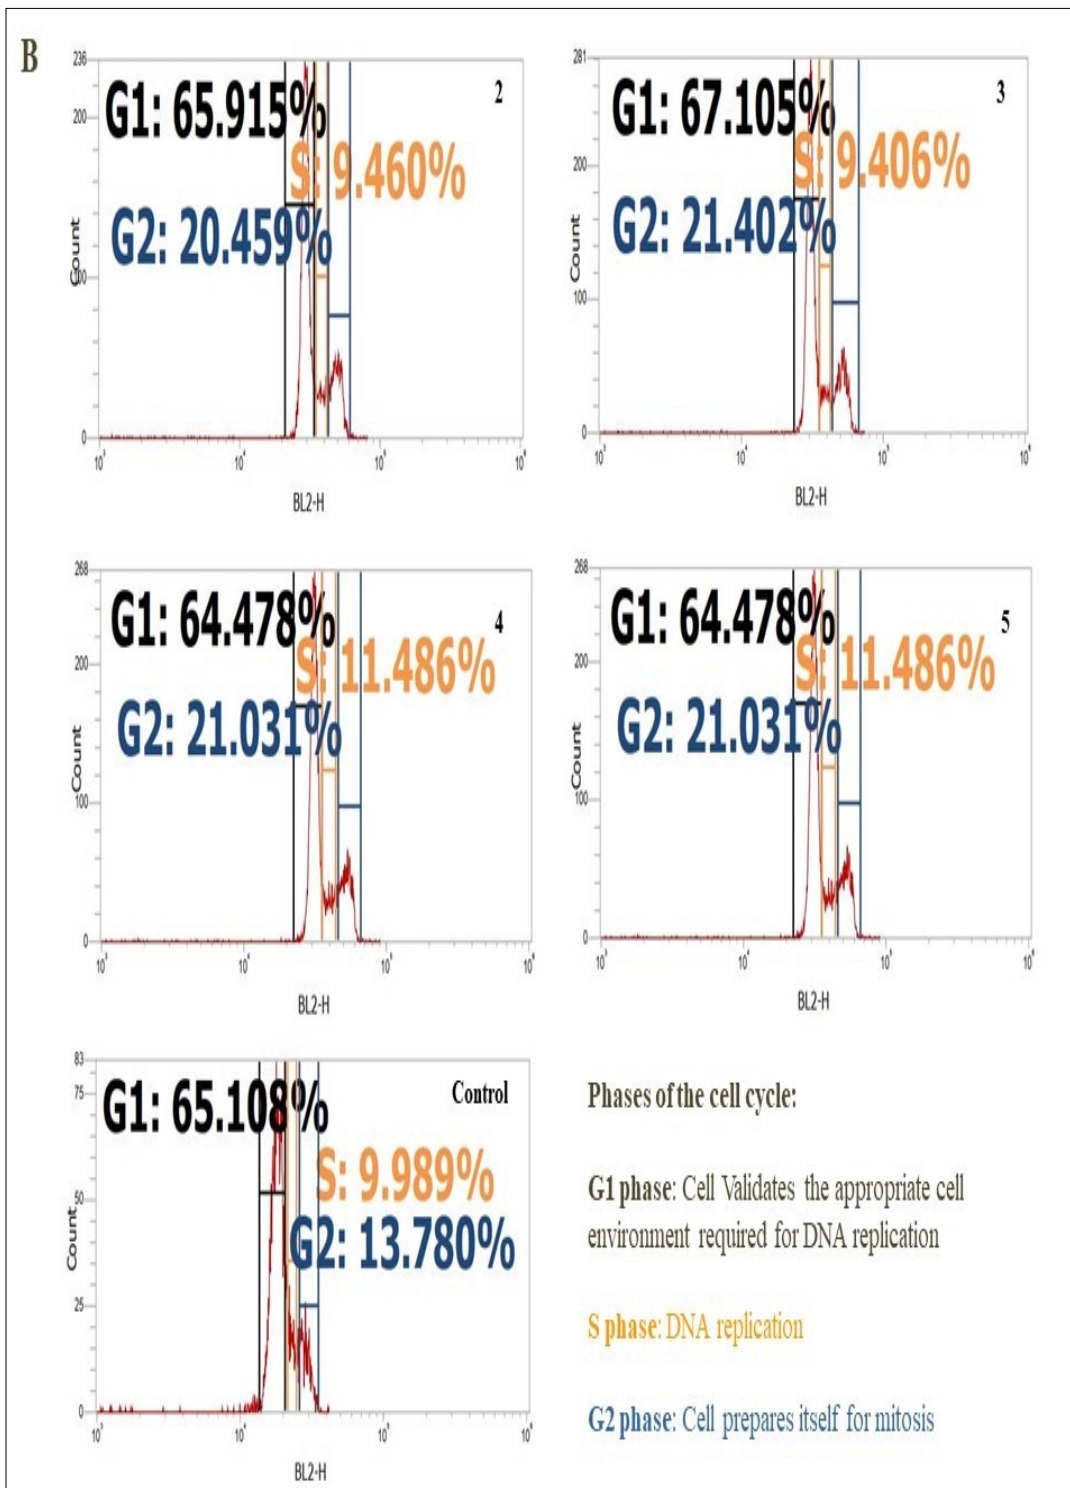

**Figure 43b.** Effect of phthiocol complexes on cell cycle of B) A549 cell lines at 30  $\mu$ M concentration.



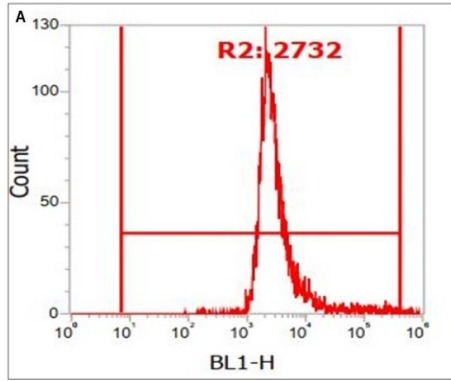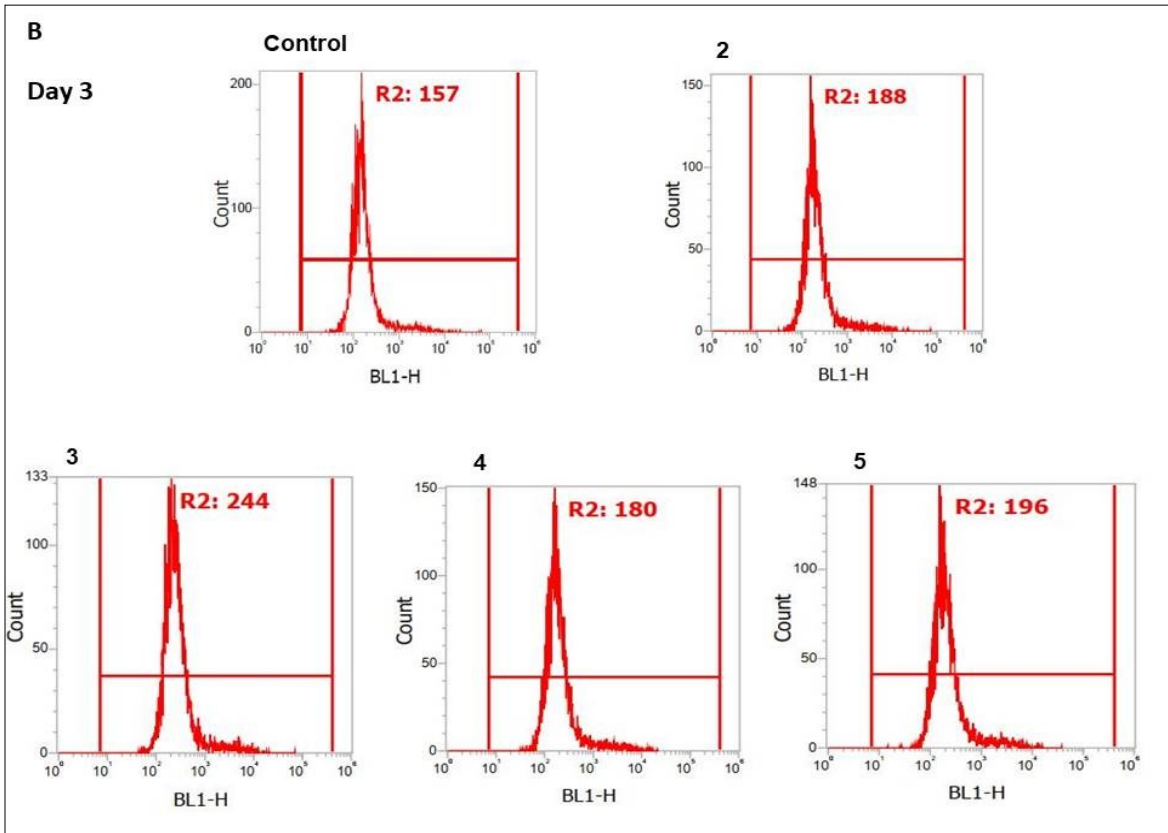

**Figure S44a.** Effect of phthiocol complexes on cell proliferation of MCF-7 at day three, A) Fluorescence of control at Zero-hr, B) Fluorescence after Three-day treatment.

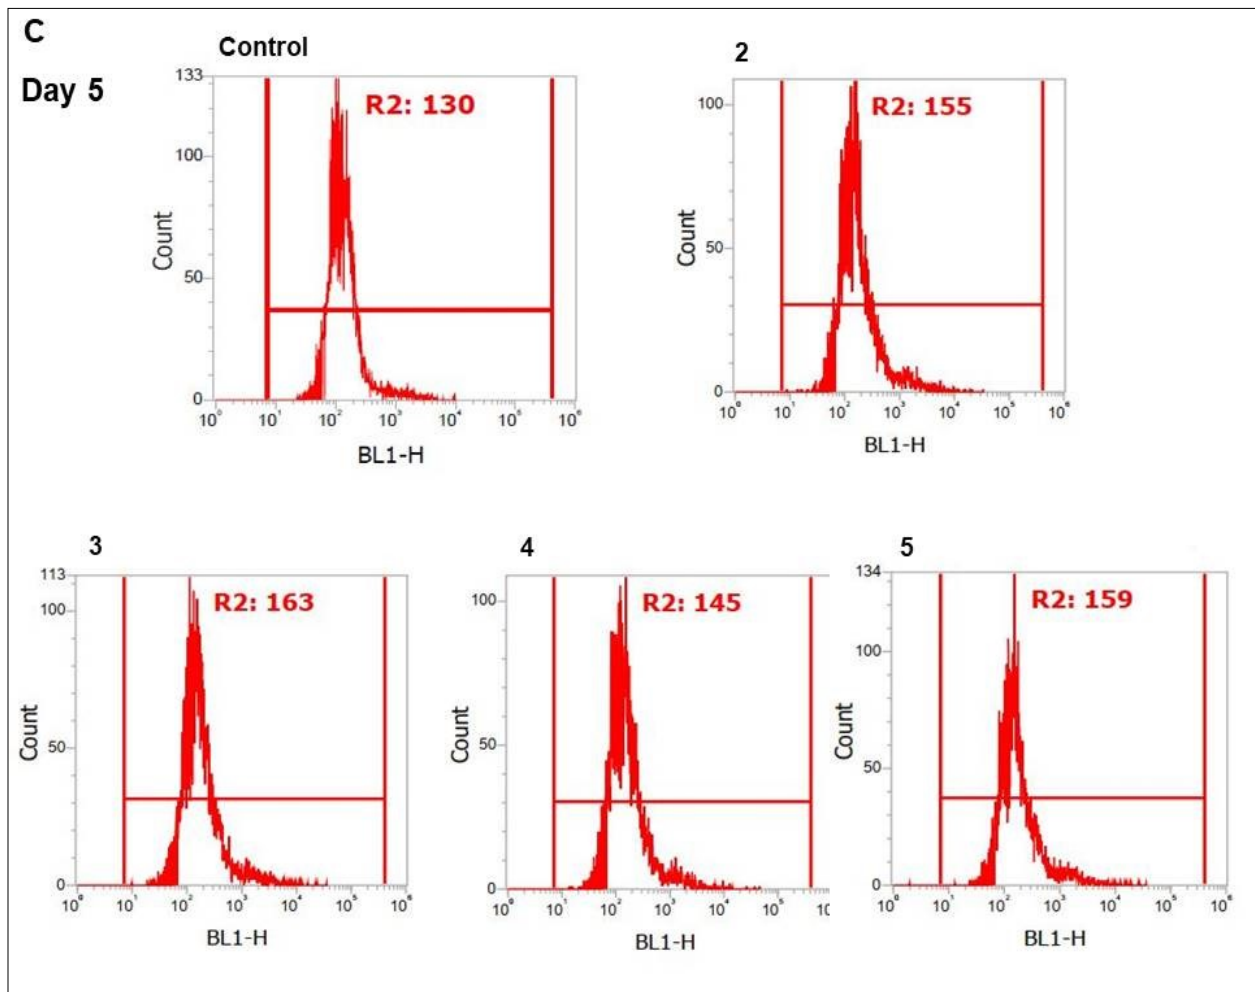

**Figure S44b.** Effect of phthiocol complexes on cell proliferation of MCF-7 day five after treatments. C) Fluorescence after five-day treatment.

**Table S1.** FT-IR values of phthiocol (**pht**), and its metal complexes region 4000 cm<sup>-1</sup> to 400 cm<sup>-1</sup>

| <b>Functional groups</b> | <b>pht</b>    | <b>1</b>      | <b>1A</b>     | <b>2</b>      | <b>2A</b> | <b>3</b> | <b>3A</b> | <b>4</b> | <b>4A</b>     | <b>5</b>      | <b>5A</b>     |
|--------------------------|---------------|---------------|---------------|---------------|-----------|----------|-----------|----------|---------------|---------------|---------------|
| v <sub>O-H</sub>         | 3326          | 3252          | 3228          | 3391          | 3429      | 3411     | 3364      | -        | 3456,<br>3345 | 3446          | 3326          |
| v <sub>C=O</sub>         | 1700,<br>1660 | 1637          | 1632          | 1661          | 1648      | 1621     | 1628      | 1621     | 1647          | 1650          | 1624          |
| v <sub>C=C</sub>         | 1582          | 1591,<br>1545 | 1586,<br>1540 | 1598,<br>1522 | 1579      | 1534     | 1586      | 1551     | 1564          | 1600,<br>1527 | 1587,<br>1560 |
| pNQ                      | 1286          | 1280          | 1280          | 1280          | 1273      | 1275     | 1275      | 1275     | 1279          | 1280          | 1285          |

**Table S2.** Hydrogen bonding geometries and other molecular interactions for **Na(pht)**, **1**, **1B**, **1A** and **3**

| Code                         | D-H...A                              | D-H(Å)  | H...A(Å) | D...A(Å) | D-H...A(°)       | Symmetry         |
|------------------------------|--------------------------------------|---------|----------|----------|------------------|------------------|
| <b>Na(pht)</b>               | O(5)-H(5B)...O(6) <sup>i</sup>       | 0.76(6) | 2.14(6)  | 2.894(2) | 175(5)           | x,1-y,1/2+z,     |
|                              | O(5)-H(5A)...O(6) <sup>i</sup>       | 0.87(5) | 1.96(6)  | 2.789(5) | 159(5)           | x,1-y,1/2+z,     |
|                              | O(6)-H(6B)...O(3) <sup>ii</sup>      | 0.83(5) | 1.93(5)  | 2.752(5) | 170(5)           | 1/2+x,1/2+y,-1+z |
|                              | O(4)-H(4)...O(2) <sup>iii</sup>      | 0.95    | 1.74(5)  | 2.683(5) | 168              | x,y,-1+z         |
| <b>1</b>                     | C(6A)-H(6A)...O(1C) <sup>i</sup>     | 0.931   | 2.618    | 3.419(4) | 144.5            | x,-y,1/2+z       |
|                              | C(6D)-H(6D)...O(1B) <sup>i</sup>     | 0.931   | 2.611    | 3.407(4) | 143.8            | x,-y,1/2+z       |
|                              | C(11C)-H(11L)...O(20') <sup>ii</sup> | 0.96(2) | 2.27     | 3.14(2)  | 150.3            | 1/2+x,1/2+y,-1+z |
|                              | O(4C)-H(4C1)...O(3A) <sup>iii</sup>  | 0.84(3) | 1.94(3)  | 2.724(3) | 154(3)           | x,y,-1+z         |
|                              | O(4C)-H(4C2)...O(3D) <sup>i</sup>    | 0.84(2) | 1.98(3)  | 2.796(3) | 164(3)           | x,-y,1/2+z       |
|                              | O(4D)-H(4D2)...O(2A) <sup>iv</sup>   | 0.84(3) | 1.99(3)  | 2.815(3) | 171(3)           | 1.5-x,-1/2-y,1-z |
|                              | O(4D)-H(4D1)...O(20) <sup>v</sup>    | 0.83(3) | 1.80(3)  | 2.559(8) | 151(3)           | x,y,z            |
|                              | O(4A)-H(4A1)...O(2D) <sup>iv</sup>   | 0.84(2) | 1.91(2)  | 2.748(3) | 174(3)           | 1.5-x,-1/2-y,1-z |
|                              | O(4A)-H(4A2)...O(20') <sup>v</sup>   | 0.84(3) | 1.64(5)  | 2.39(2)  | 147(4)           | x,y,z            |
|                              | O(4B)-H(4B1)...O(3C) <sup>iv</sup>   | 0.84(2) | 1.87(3)  | 2.705(3) | 171(3)           | 1.5-x,-1/2-y,1-z |
|                              | O(4B)-H(4B2)...O(2B) <sup>vi</sup>   | 0.84(2) | 1.90(2)  | 2.730(3) | 171(3)           | 1-x,y,1.5-z      |
|                              | C(11D)...C(3C) <sup>i</sup>          |         |          | 3.364(4) |                  | x,-y,1/2+z       |
|                              | C(9D)...C(4A) <sup>iv</sup>          |         |          | 3.348(4) |                  | 1.5-x,-1/2-y,1-z |
|                              | C(4D)...C(9A) <sup>iv</sup>          |         |          | 3.383(4) |                  | 1.5-x,-1/2-y,1-z |
|                              | C(10D)...C(10A) <sup>iv</sup>        |         |          | 3.374(4) |                  | 1.5-x,-1/2-y,1-z |
|                              | C(3D)...C(1A) <sup>iv</sup>          |         |          | 3.393(4) |                  | 1.5-x,-1/2-y,1-z |
|                              | C(7C)...C(1B) <sup>iv</sup>          |         |          | 3.392(4) |                  | 1.5-x,-1/2-y,1-z |
|                              | C(6C)...C(2B) <sup>iv</sup>          |         |          | 3.361(4) |                  | 1.5-x,-1/2-y,1-z |
|                              | C(3B)...C(5C) <sup>iv</sup>          |         |          | 3.396(4) |                  | 1.5-x,-1/2-y,1-z |
|                              | C(2B)...C(6C) <sup>iv</sup>          |         |          | 3.361(4) |                  | 1.5-x,-1/2-y,1-z |
| O(3D)...O(4C) <sup>i</sup>   |                                      |         | 2.796(3) |          | x,-y,1/2+z       |                  |
| O(2C)...O(20') <sup>iv</sup> |                                      |         | 2.81(2)  |          | 1.5-x,-1/2-y,1-z |                  |
| O(2C)...O(20) <sup>v</sup>   |                                      |         | 2.928(7) |          | x,y,z            |                  |
| <b>1B</b>                    | O(1M)-H(1M)...O(3)                   | 0.8247  | 1.9276   | 2.6891   | 153.11           | 1-x,2-y,1-z      |
|                              | O(1W)-H(1W1)...O(2W)                 | 0.8365  | 1.7872   | 2.6087   | 166.87           | x,y,z            |
|                              | O(1W)-H(1W2)...O(6)                  | 0.8048  | 2.0174   | 2.7277   | 146.99           | -x,1-y,1-z       |
|                              | O(2W)-H(2W1)...O(1)                  | 0.8301  | 1.9982   | 2.7726   | 154.96           | x,1.5-y,-1/2+z   |
|                              | O(2W)-H(2W2)...O(4)                  | 0.8243  | 2.0799   | 2.7331   | 135.94           | x,1.5-y,-1/2+z   |
|                              | C(2)...O(3)                          |         |          | 3.1921   |                  | 1-x,2-y,1-z      |
|                              | C(1)...C(5) <sup>v</sup>             |         |          | 3.348    |                  | -x,2-y,1-z       |

|           |                            |          |         |          |         |                   |
|-----------|----------------------------|----------|---------|----------|---------|-------------------|
|           | C(12)···C(16) <sup>v</sup> |          |         | 3.3679   |         | 1-x,1-y,1-z       |
|           |                            |          |         |          |         |                   |
| <b>1A</b> | C(9)-H(9A)···O(3)          | 0.930    | 2.686   | 3.616(3) | 177.9   | 1-x,1-y,1-z       |
|           | C(6A)···H(6A)···O(2)       | 0.930    | 2.648   | 3.445(4) | 144.2   | x,1/2-y,-1/2+z    |
|           | O(1W)-H(1W2)···O(3)        | 0.82(2)  | 1.94(2) | 2.758(3) | 177(2)  | -1+x,1/2-y,-1/2+z |
|           | O(1W)-H(1W1)···O(2)        | 0.83(3)  | 1.87(3) | 2.695(3) | 173(3)  | -1+x,y,z          |
|           | C(11)-H(11C)···O(2B)       | 0.960    | 2.839   |          | 143.49  | -1+x,y,z          |
|           |                            |          |         |          |         |                   |
| <b>3</b>  |                            |          |         |          |         |                   |
|           | O(4)-H(4B)···O(1\)         | 0.85(5)  | 1.96(7) | 2.77(1)  | 132.6   | 2-x,1-y,1-z       |
|           | O(11)-H(11B)···O(4)        | 0.83(5)  | 2.16(5) | 2.96(1)  | 158(9)  | 2-x,1-y,1-z       |
|           | O(8)-H(8B)···O(11)         | 0.84 (4) | 1.93(4) | 2.74(1)  | 161(5)  | 1.5-y,1/2+z       |
|           | O(11)-H(11A)···O(6)        | 0.80(1)  | 2.0(1)  | 2.85(1)  | 173(10) | 1.5-y,1/2+z       |
|           | C(19)-H(19)···O(11)        | 0.93     | 2.694   | 3.57(1)  | 157.3   | 1.5-y,1/2+z       |
|           | C(22)-H(22B)···O(1)        | 0.96     | 2.625   | 3.35(1)  | 132.6   | x,1/2-y,-1/2+z    |
|           | C(9)···C(9)                |          |         | 3.39(2)  |         | 2-x,-y,1-z        |
|           | C(16)-H(16)···Cg           | 0.93     |         | 2.803    | 146.64  |                   |
|           |                            |          |         |          |         |                   |

**Table S3.** Crystal data and structure refinement for **Na(pht)**

|                                   |                                                                 |                  |
|-----------------------------------|-----------------------------------------------------------------|------------------|
| Identification code               | shelx                                                           |                  |
| Empirical formula                 | C <sub>22</sub> H <sub>24</sub> Na <sub>2</sub> O <sub>11</sub> |                  |
| Formula weight                    | 510.39                                                          |                  |
| Temperature                       | 293(2) K                                                        |                  |
| Wavelength                        | 0.71073 Å                                                       |                  |
| Crystal system                    | Monoclinic                                                      |                  |
| Space group                       | C 2/c                                                           |                  |
| Unit cell dimensions              | a = 17.988(3) Å                                                 | α = 90°.         |
|                                   | b = 18.798(3) Å                                                 | β = 101.468(5)°. |
|                                   | c = 6.7722(9) Å                                                 | γ = 90°.         |
| Volume                            | 2244.2(6) Å <sup>3</sup>                                        |                  |
| Z                                 | 4                                                               |                  |
| Density (calculated)              | 1.511 Mg/m <sup>3</sup>                                         |                  |
| Absorption coefficient            | 0.153 mm <sup>-1</sup>                                          |                  |
| F(000)                            | 1064                                                            |                  |
| Crystal size                      | 0.21 x 0.16 x 0.11 mm <sup>3</sup>                              |                  |
| Theta range for data collection   | 3.168 to 28.353°.                                               |                  |
| Index ranges                      | -24 ≤ h ≤ 24, -25 ≤ k ≤ 25, -9 ≤ l ≤ 9                          |                  |
| Reflections collected             | 11471                                                           |                  |
| Independent reflections           | 2779 [R(int) = 0.1747]                                          |                  |
| Completeness to theta = 25.242°   | 99.7 %                                                          |                  |
| Absorption correction             | Semi-empirical from equivalents                                 |                  |
| Max. and min. transmission        | 0.778 and 0.712                                                 |                  |
| Refinement method                 | Full-matrix least-squares on F <sup>2</sup>                     |                  |
| Data / restraints / parameters    | 2779 / 8 / 180                                                  |                  |
| Goodness-of-fit on F <sup>2</sup> | 1.017                                                           |                  |
| Final R indices [I > 2σ(I)]       | R1 = 0.0960, wR2 = 0.1565                                       |                  |
| R indices (all data)              | R1 = 0.2279, wR2 = 0.1977                                       |                  |
| Extinction coefficient            | n/a                                                             |                  |
| Largest diff. peak and hole       | 0.296 and -0.401 e.Å <sup>-3</sup>                              |                  |

**Table S4** Atomic coordinates ( $\times 10^4$ ) and equivalent isotropic displacement parameters ( $\text{\AA}^2 \times 10^3$ ) for **Na(pht)**.  $U(\text{eq})$  is defined as one third of the trace of the orthogonalized  $U_{ij}$  tensor

|       | x       | y       | z        | U(eq) |
|-------|---------|---------|----------|-------|
| Na    | 5905(1) | 4393(1) | 8309(2)  | 31(1) |
| O(1)  | 3802(2) | 3313(2) | 4578(5)  | 37(1) |
| O(2)  | 5237(2) | 3770(2) | 5553(4)  | 33(1) |
| O(3)  | 6038(2) | 1389(2) | 5517(5)  | 35(1) |
| O(4)  | 5000    | 5295(2) | 7500     | 32(1) |
| O(5)  | 6715(2) | 5113(2) | 10923(5) | 34(1) |
| O(6)  | 7473(2) | 4037(2) | 13362(6) | 38(1) |
| C(1)  | 4306(2) | 2867(2) | 4774(6)  | 22(1) |
| C(2)  | 5128(2) | 3098(2) | 5279(5)  | 22(1) |
| C(3)  | 5698(2) | 2591(2) | 5439(6)  | 22(1) |
| C(4)  | 5535(2) | 1849(2) | 5283(6)  | 23(1) |
| C(5)  | 4731(2) | 1610(2) | 4838(6)  | 23(1) |
| C(6)  | 4557(3) | 891(2)  | 4679(7)  | 39(1) |
| C(7)  | 3826(3) | 654(3)  | 4259(8)  | 48(2) |
| C(8)  | 3237(3) | 1139(3) | 4007(8)  | 42(1) |
| C(9)  | 3391(2) | 1856(3) | 4149(6)  | 31(1) |
| C(10) | 4129(2) | 2100(2) | 4559(6)  | 20(1) |
| C(11) | 6516(2) | 2811(3) | 5852(7)  | 38(1) |

**Table S5.** Bond lengths [Å] and angles [°] for **Na(pht)**

---

|              |            |
|--------------|------------|
| Na-O(2)      | 2.325(3)   |
| Na-O(4)      | 2.339(4)   |
| Na-O(5)      | 2.463(4)   |
| Na-O(1)#1    | 2.480(3)   |
| Na-O(5)#2    | 2.556(4)   |
| Na-O(2)#1    | 2.611(4)   |
| Na-Na#1      | 3.222(3)   |
| Na-Na#2      | 4.0834(19) |
| Na-Na#3      | 4.0835(19) |
| O(1)-C(1)    | 1.223(5)   |
| O(2)-C(2)    | 1.287(5)   |
| O(3)-C(4)    | 1.239(5)   |
| O(4)-H(4)    | 0.843(18)  |
| O(4)-H(4)#1  | 0.843(18)  |
| O(5)-H(51)   | 0.817(19)  |
| O(5)-H(52)   | 0.826(19)  |
| O(6)-H(61)   | 0.825(19)  |
| O(6)-H(62)   | 0.819(19)  |
| C(1)-C(10)   | 1.478(6)   |
| C(1)-C(2)    | 1.513(6)   |
| C(2)-C(3)    | 1.388(6)   |
| C(3)-C(4)    | 1.426(6)   |
| C(3)-C(11)   | 1.499(6)   |
| C(4)-C(5)    | 1.486(6)   |
| C(5)-C(6)    | 1.386(6)   |
| C(5)-C(10)   | 1.406(6)   |
| C(6)-C(7)    | 1.364(6)   |
| C(6)-H(6A)   | 0.9300     |
| C(7)-C(8)    | 1.381(7)   |
| C(7)-H(7A)   | 0.9300     |
| C(8)-C(9)    | 1.377(6)   |
| C(8)-H(8A)   | 0.9300     |
| C(9)-C(10)   | 1.378(6)   |
| C(9)-H(9A)   | 0.9300     |
| C(11)-H(11A) | 0.9600     |



|                  |            |
|------------------|------------|
| C(11)-H(11B)     | 0.9600     |
| C(11)-H(11C)     | 0.9600     |
| O(2)-Na-O(4)     | 87.28(11)  |
| O(2)-Na-O(5)     | 172.46(14) |
| O(4)-Na-O(5)     | 93.14(12)  |
| O(2)-Na-O(1)#1   | 93.89(11)  |
| O(4)-Na-O(1)#1   | 141.91(12) |
| O(5)-Na-O(1)#1   | 90.43(12)  |
| O(2)-Na-O(5)#2   | 86.80(13)  |
| O(4)-Na-O(5)#2   | 92.66(11)  |
| O(5)-Na-O(5)#2   | 85.67(10)  |
| O(1)#1-Na-O(5)#2 | 125.43(13) |
| O(2)-Na-O(2)#1   | 72.54(13)  |
| O(4)-Na-O(2)#1   | 80.92(10)  |
| O(5)-Na-O(2)#1   | 114.97(12) |
| O(1)#1-Na-O(2)#1 | 63.39(10)  |
| O(5)#2-Na-O(2)#1 | 158.54(12) |
| O(2)-Na-Na#1     | 53.21(9)   |
| O(4)-Na-Na#1     | 46.47(8)   |
| O(5)-Na-Na#1     | 131.14(11) |
| O(1)#1-Na-Na#1   | 106.31(9)  |
| O(5)#2-Na-Na#1   | 116.73(11) |
| O(2)#1-Na-Na#1   | 45.50(8)   |
| O(2)-Na-Na#2     | 72.60(8)   |
| O(4)-Na-Na#2     | 61.01(6)   |
| O(5)-Na-Na#2     | 101.03(11) |
| O(1)#1-Na-Na#2   | 154.31(10) |
| O(5)#2-Na-Na#2   | 34.79(8)   |
| O(2)#1-Na-Na#2   | 128.70(7)  |
| Na#1-Na-Na#2     | 83.38(5)   |
| O(2)-Na-Na#3     | 149.52(9)  |
| O(4)-Na-Na#3     | 70.99(7)   |
| O(5)-Na-Na#3     | 36.31(9)   |
| O(1)#1-Na-Na#3   | 90.81(8)   |
| O(5)#2-Na-Na#3   | 114.53(11) |
| O(2)#1-Na-Na#3   | 82.87(7)   |

|                  |            |
|------------------|------------|
| Na#1-Na-Na#3     | 96.62(5)   |
| Na#2-Na-Na#3     | 112.04(8)  |
| C(1)-O(1)-Na#1   | 115.5(3)   |
| C(2)-O(2)-Na     | 130.5(2)   |
| C(2)-O(2)-Na#1   | 112.1(3)   |
| Na-O(2)-Na#1     | 81.29(11)  |
| Na-O(4)-Na#1     | 87.07(17)  |
| Na-O(4)-H(4)     | 110(3)     |
| Na#1-O(4)-H(4)   | 126(4)     |
| Na-O(4)-H(4)#1   | 126(4)     |
| Na#1-O(4)-H(4)#1 | 110(3)     |
| H(4)-O(4)-H(4)#1 | 100(3)     |
| Na-O(5)-Na#3     | 108.90(14) |
| Na-O(5)-H(51)    | 102(3)     |
| Na#3-O(5)-H(51)  | 126(3)     |
| Na-O(5)-H(52)    | 102(4)     |
| Na#3-O(5)-H(52)  | 112(4)     |
| H(51)-O(5)-H(52) | 104(3)     |
| H(61)-O(6)-H(62) | 104(3)     |
| O(1)-C(1)-C(10)  | 121.1(4)   |
| O(1)-C(1)-C(2)   | 119.9(4)   |
| C(10)-C(1)-C(2)  | 118.9(4)   |
| O(2)-C(2)-C(3)   | 125.0(4)   |
| O(2)-C(2)-C(1)   | 115.3(4)   |
| C(3)-C(2)-C(1)   | 119.7(4)   |
| C(2)-C(3)-C(4)   | 121.8(4)   |
| C(2)-C(3)-C(11)  | 120.6(4)   |
| C(4)-C(3)-C(11)  | 117.6(4)   |
| O(3)-C(4)-C(3)   | 122.5(4)   |
| O(3)-C(4)-C(5)   | 118.2(4)   |
| C(3)-C(4)-C(5)   | 119.3(4)   |
| C(6)-C(5)-C(10)  | 118.2(4)   |
| C(6)-C(5)-C(4)   | 120.4(4)   |
| C(10)-C(5)-C(4)  | 121.4(4)   |
| C(7)-C(6)-C(5)   | 121.8(4)   |
| C(7)-C(6)-H(6A)  | 119.1      |
| C(5)-C(6)-H(6A)  | 119.1      |

|                     |          |
|---------------------|----------|
| C(6)-C(7)-C(8)      | 119.6(5) |
| C(6)-C(7)-H(7A)     | 120.2    |
| C(8)-C(7)-H(7A)     | 120.2    |
| C(9)-C(8)-C(7)      | 119.9(4) |
| C(9)-C(8)-H(8A)     | 120.0    |
| C(7)-C(8)-H(8A)     | 120.0    |
| C(8)-C(9)-C(10)     | 120.8(4) |
| C(8)-C(9)-H(9A)     | 119.6    |
| C(10)-C(9)-H(9A)    | 119.6    |
| C(9)-C(10)-C(5)     | 119.6(4) |
| C(9)-C(10)-C(1)     | 121.6(4) |
| C(5)-C(10)-C(1)     | 118.7(4) |
| C(3)-C(11)-H(11A)   | 109.5    |
| C(3)-C(11)-H(11B)   | 109.5    |
| H(11A)-C(11)-H(11B) | 109.5    |
| C(3)-C(11)-H(11C)   | 109.5    |
| H(11A)-C(11)-H(11C) | 109.5    |
| H(11B)-C(11)-H(11C) | 109.5    |

---

Symmetry transformations used to generate equivalent atoms:

#1  $-x+1, y, -z+3/2$  #2  $x, -y+1, z-1/2$  #3  $x, -y+1, z+1/2$

**Table S6.** Anisotropic displacement parameters ( $\text{\AA}^2 \times 10^3$ ) for **Na(pht)**. The anisotropic displacement factor exponent takes the form:  $-2\pi^2[h^2a^*2U^{11} + \dots + 2hk a^* b^* U^{12}]$

|       | $U^{11}$ | $U^{22}$ | $U^{33}$ | $U^{23}$ | $U^{13}$ | $U^{12}$ |
|-------|----------|----------|----------|----------|----------|----------|
| Na    | 29(1)    | 23(1)    | 36(1)    | -1(1)    | -3(1)    | -3(1)    |
| O(1)  | 31(2)    | 28(2)    | 46(2)    | -3(2)    | -5(2)    | 14(2)    |
| O(2)  | 50(2)    | 14(2)    | 31(2)    | -1(1)    | 2(2)     | -9(2)    |
| O(3)  | 21(2)    | 30(2)    | 53(2)    | -2(2)    | 4(2)     | 11(2)    |
| O(4)  | 44(3)    | 22(3)    | 28(3)    | 0        | 3(2)     | 0        |
| O(5)  | 33(2)    | 31(2)    | 39(2)    | 5(2)     | 9(2)     | -2(2)    |
| O(6)  | 27(2)    | 31(2)    | 56(2)    | 2(2)     | 7(2)     | 5(2)     |
| C(1)  | 24(3)    | 19(3)    | 22(2)    | -2(2)    | 1(2)     | 2(2)     |
| C(2)  | 32(3)    | 19(2)    | 12(2)    | 1(2)     | 0(2)     | -7(2)    |
| C(3)  | 19(2)    | 22(3)    | 25(2)    | 2(2)     | 3(2)     | -3(2)    |
| C(4)  | 16(2)    | 26(3)    | 27(2)    | 0(2)     | 6(2)     | 5(2)     |
| C(5)  | 23(3)    | 15(2)    | 28(2)    | -2(2)    | 2(2)     | -1(2)    |
| C(6)  | 31(3)    | 19(3)    | 64(3)    | -1(2)    | 7(3)     | 2(2)     |
| C(7)  | 52(4)    | 19(3)    | 70(4)    | -6(3)    | 10(3)    | -15(3)   |
| C(8)  | 25(3)    | 44(4)    | 55(3)    | -8(3)    | 6(2)     | -20(3)   |
| C(9)  | 19(3)    | 35(3)    | 37(3)    | -7(2)    | 4(2)     | -1(2)    |
| C(10) | 14(2)    | 26(3)    | 18(2)    | -3(2)    | -1(2)    | 2(2)     |
| C(11) | 28(3)    | 42(3)    | 45(3)    | -5(2)    | 9(2)     | -12(2)   |

**Table S7.** Torsion angles [°] for Na(pht)

---

|                      |           |
|----------------------|-----------|
| Na#1-O(1)-C(1)-C(10) | 147.3(3)  |
| Na#1-O(1)-C(1)-C(2)  | -31.6(5)  |
| Na-O(2)-C(2)-C(3)    | -56.3(6)  |
| Na#1-O(2)-C(2)-C(3)  | -153.9(3) |
| Na-O(2)-C(2)-C(1)    | 123.0(3)  |
| Na#1-O(2)-C(2)-C(1)  | 25.3(4)   |
| O(1)-C(1)-C(2)-O(2)  | 2.7(6)    |
| C(10)-C(1)-C(2)-O(2) | -176.3(3) |
| O(1)-C(1)-C(2)-C(3)  | -178.1(4) |
| C(10)-C(1)-C(2)-C(3) | 3.0(5)    |
| O(2)-C(2)-C(3)-C(4)  | 174.6(4)  |
| C(1)-C(2)-C(3)-C(4)  | -4.6(6)   |
| O(2)-C(2)-C(3)-C(11) | -3.4(6)   |
| C(1)-C(2)-C(3)-C(11) | 177.4(4)  |
| C(2)-C(3)-C(4)-O(3)  | -176.5(4) |
| C(11)-C(3)-C(4)-O(3) | 1.6(6)    |
| C(2)-C(3)-C(4)-C(5)  | 3.0(6)    |
| C(11)-C(3)-C(4)-C(5) | -178.9(4) |
| O(3)-C(4)-C(5)-C(6)  | -0.5(6)   |
| C(3)-C(4)-C(5)-C(6)  | -180.0(4) |
| O(3)-C(4)-C(5)-C(10) | 179.8(4)  |
| C(3)-C(4)-C(5)-C(10) | 0.3(6)    |
| C(10)-C(5)-C(6)-C(7) | 0.2(7)    |
| C(4)-C(5)-C(6)-C(7)  | -179.5(5) |
| C(5)-C(6)-C(7)-C(8)  | -0.8(8)   |
| C(6)-C(7)-C(8)-C(9)  | 1.0(8)    |
| C(7)-C(8)-C(9)-C(10) | -0.6(7)   |
| C(8)-C(9)-C(10)-C(5) | -0.1(7)   |
| C(8)-C(9)-C(10)-C(1) | -178.3(4) |
| C(6)-C(5)-C(10)-C(9) | 0.3(6)    |
| C(4)-C(5)-C(10)-C(9) | 180.0(4)  |
| C(6)-C(5)-C(10)-C(1) | 178.5(4)  |
| C(4)-C(5)-C(10)-C(1) | -1.7(6)   |
| O(1)-C(1)-C(10)-C(9) | -0.6(6)   |
| C(2)-C(1)-C(10)-C(9) | 178.4(4)  |

|                      |           |
|----------------------|-----------|
| O(1)-C(1)-C(10)-C(5) | -178.8(4) |
| C(2)-C(1)-C(10)-C(5) | 0.2(6)    |

---

Symmetry transformations used to generate equivalent atoms:

#1  $-x+1, y, -z+3/2$  #2  $x, -y+1, z-1/2$  #3  $x, -y+1, z+1/2$

**Table S8.** Crystal data and structure refinement for **1**

|                                   |                                                   |                  |
|-----------------------------------|---------------------------------------------------|------------------|
| Identification code               | shelx                                             |                  |
| Empirical formula                 | C <sub>22</sub> H <sub>20</sub> Mn O <sub>9</sub> |                  |
| Formula weight                    | 483.32                                            |                  |
| Temperature                       | 293(2) K                                          |                  |
| Wavelength                        | 0.71073 Å                                         |                  |
| Crystal system                    | Monoclinic                                        |                  |
| Space group                       | C 2/c                                             |                  |
| Unit cell dimensions              | a = 33.7912(9) Å                                  | α = 90°.         |
|                                   | b = 13.3987(3) Å                                  | β = 96.3400(8)°. |
|                                   | c = 18.5028(5) Å                                  | γ = 90°.         |
| Volume                            | 8326.1(4) Å <sup>3</sup>                          |                  |
| Z                                 | 16                                                |                  |
| Density (calculated)              | 1.542 Mg/m <sup>3</sup>                           |                  |
| Absorption coefficient            | 0.688 mm <sup>-1</sup>                            |                  |
| F(000)                            | 3984                                              |                  |
| Crystal size                      | 0.350 x 0.290 x 0.120 mm <sup>3</sup>             |                  |
| Theta range for data collection   | 2.640 to 28.450°.                                 |                  |
| Index ranges                      | -45 ≤ h ≤ 45, -17 ≤ k ≤ 17, -24 ≤ l ≤ 24          |                  |
| Reflections collected             | 99477                                             |                  |
| Independent reflections           | 10433 [R(int) = 0.0991]                           |                  |
| Completeness to theta = 25.242°   | 99.9 %                                            |                  |
| Absorption correction             | Semi-empirical from equivalents                   |                  |
| Max. and min. transmission        | 0.921 and 0.787                                   |                  |
| Refinement method                 | Full-matrix least-squares on F <sup>2</sup>       |                  |
| Data / restraints / parameters    | 10433 / 66 / 647                                  |                  |
| Goodness-of-fit on F <sup>2</sup> | 1.074                                             |                  |
| Final R indices [I > 2σ(I)]       | R1 = 0.0615, wR2 = 0.1269                         |                  |
| R indices (all data)              | R1 = 0.0934, wR2 = 0.1401                         |                  |
| Extinction coefficient            | n/a                                               |                  |
| Largest diff. peak and hole       | 0.425 and -0.368 e.Å <sup>-3</sup>                |                  |

**Table S9.** Atomic coordinates ( $\times 10^4$ ) and equivalent isotropic displacement parameters ( $\text{\AA}^2 \times 10^3$ ) for **1**.  $U(\text{eq})$  is defined as one third of the trace of the orthogonalized  $U_{ij}$  tensor

|        | x       | y        | z       | $U(\text{eq})$ |
|--------|---------|----------|---------|----------------|
| Mn(1)  | 5798(1) | -1118(1) | 7766(1) | 30(1)          |
| O(4A)  | 5722(1) | -2664(2) | 8043(2) | 63(1)          |
| O(4B)  | 5356(1) | -1354(2) | 6866(1) | 47(1)          |
| O(1A)  | 6265(1) | -1323(2) | 7006(1) | 36(1)          |
| C(1A)  | 6613(1) | -1320(2) | 7285(1) | 26(1)          |
| O(2A)  | 6370(1) | -1186(1) | 8433(1) | 32(1)          |
| C(2A)  | 6688(1) | -1254(2) | 8102(1) | 27(1)          |
| O(3A)  | 7755(1) | -1297(2) | 8288(1) | 44(1)          |
| C(3A)  | 7074(1) | -1253(2) | 8430(1) | 30(1)          |
| C(4A)  | 7406(1) | -1299(2) | 8002(2) | 30(1)          |
| C(5A)  | 7651(1) | -1328(2) | 6773(2) | 37(1)          |
| C(6A)  | 7585(1) | -1366(2) | 6028(2) | 44(1)          |
| C(7A)  | 7200(1) | -1413(2) | 5686(2) | 45(1)          |
| C(8A)  | 6881(1) | -1413(2) | 6093(2) | 38(1)          |
| C(9A)  | 6948(1) | -1366(2) | 6842(1) | 28(1)          |
| C(10A) | 7335(1) | -1330(2) | 7192(2) | 28(1)          |
| C(11A) | 7162(1) | -1158(3) | 9239(2) | 46(1)          |
| O(1B)  | 5844(1) | 552(1)   | 7526(1) | 36(1)          |
| C(1B)  | 5618(1) | 1080(2)  | 7840(1) | 27(1)          |
| O(2B)  | 5359(1) | -383(1)  | 8315(1) | 31(1)          |
| C(2B)  | 5335(1) | 587(2)   | 8294(1) | 26(1)          |
| O(3B)  | 4893(1) | 2751(2)  | 8989(1) | 58(1)          |
| C(3B)  | 5086(1) | 1153(2)  | 8661(1) | 30(1)          |
| C(4B)  | 5101(1) | 2233(2)  | 8637(2) | 34(1)          |
| C(5B)  | 5412(1) | 3775(2)  | 8186(2) | 45(1)          |
| C(6B)  | 5680(1) | 4239(2)  | 7797(2) | 59(1)          |
| C(7B)  | 5922(1) | 3682(3)  | 7395(2) | 64(1)          |
| C(8B)  | 5895(1) | 2653(2)  | 7386(2) | 46(1)          |
| C(9B)  | 5630(1) | 2179(2)  | 7795(1) | 30(1)          |
| C(10B) | 5384(1) | 2738(2)  | 8191(1) | 32(1)          |
| C(11B) | 4810(1) | 692(3)   | 9143(2) | 49(1)          |
| Mn(2)  | 8513(1) | -992(1)  | 554(1)  | 30(1)          |



|        |         |           |          |       |
|--------|---------|-----------|----------|-------|
| O(4C)  | 8225(1) | -644(2)   | -515(1)  | 51(1) |
| O(4D)  | 8638(1) | -2543(2)  | 358(1)   | 48(1) |
| O(1C)  | 8530(1) | 734(1)    | 710(1)   | 35(1) |
| C(1C)  | 8809(1) | 1123(2)   | 441(1)   | 27(1) |
| O(2C)  | 9063(1) | -488(1)   | 249(1)   | 37(1) |
| C(2C)  | 9105(1) | 453(2)    | 126(1)   | 27(1) |
| O(3C)  | 9627(1) | 2264(2)   | -805(1)  | 54(1) |
| C(3C)  | 9371(1) | 846(2)    | -299(1)  | 30(1) |
| C(4C)  | 9396(1) | 1909(2)   | -396(2)  | 33(1) |
| C(5C)  | 9183(1) | 3622(2)   | -65(2)   | 42(1) |
| C(6C)  | 8948(1) | 4253(2)   | 301(2)   | 49(1) |
| C(7C)  | 8670(1) | 3873(2)   | 716(2)   | 46(1) |
| C(8C)  | 8618(1) | 2848(2)   | 762(2)   | 37(1) |
| C(9C)  | 8854(1) | 2211(2)   | 401(1)   | 28(1) |
| C(10C) | 9141(1) | 2596(2)   | -14(1)   | 31(1) |
| C(11C) | 9622(1) | 183(3)    | -718(2)  | 49(1) |
| O(1D)  | 7910(1) | -1158(2)  | 901(1)   | 36(1) |
| C(1D)  | 7899(1) | -1187(2)  | 1560(1)  | 26(1) |
| O(2D)  | 8601(1) | -1197(1)  | 1705(1)  | 33(1) |
| C(2D)  | 8285(1) | -1186(2)  | 2048(1)  | 27(1) |
| O(3D)  | 7909(1) | -1067(2)  | 3776(1)  | 47(1) |
| C(3D)  | 8284(1) | -1164(2)  | 2787(1)  | 31(1) |
| C(4D)  | 7914(1) | -1133(2)  | 3112(1)  | 32(1) |
| C(5D)  | 7170(1) | -1182(2)  | 2937(2)  | 39(1) |
| C(6D)  | 6815(1) | -1209(2)  | 2492(2)  | 46(1) |
| C(7D)  | 6810(1) | -1243(2)  | 1749(2)  | 48(1) |
| C(8D)  | 7162(1) | -1243(2)  | 1437(2)  | 38(1) |
| C(9D)  | 7521(1) | -1213(2)  | 1880(1)  | 28(1) |
| C(10D) | 7528(1) | -1182(2)  | 2634(1)  | 29(1) |
| C(11D) | 8664(1) | -1166(2)  | 3290(2)  | 45(1) |
| O(1W)  | 5008(2) | -3577(4)  | 7889(3)  | 81(2) |
| O(2W)  | 9090(2) | -2312(6)  | -662(4)  | 88(2) |
| O(1WA) | 5452(3) | -2898(9)  | 9298(8)  | 86(3) |
| O(2WA) | 9439(3) | -2329(8)  | 199(6)   | 92(3) |
| O(1WB) | 5323(4) | -3564(12) | 8812(11) | 85(3) |
| O(2WB) | 9265(6) | -2325(18) | -277(12) | 89(4) |

**Table S10.** Bond lengths [ $\text{\AA}$ ] and angles [ $^\circ$ ] for **1**

---

|               |            |
|---------------|------------|
| Mn(1)-O(2B)   | 2.1294(18) |
| Mn(1)-O(4B)   | 2.135(2)   |
| Mn(1)-O(4A)   | 2.156(2)   |
| Mn(1)-O(2A)   | 2.1768(18) |
| Mn(1)-O(1A)   | 2.2429(19) |
| Mn(1)-O(1B)   | 2.2892(19) |
| O(4A)-H(4AA)  | 0.808(18)  |
| O(4A)-H(4AB)  | 0.794(17)  |
| O(4B)-H(4BA)  | 0.822(17)  |
| O(4B)-H(4BB)  | 0.807(17)  |
| O(1A)-C(1A)   | 1.230(3)   |
| C(1A)-C(9A)   | 1.471(4)   |
| C(1A)-C(2A)   | 1.507(4)   |
| O(2A)-C(2A)   | 1.299(3)   |
| C(2A)-C(3A)   | 1.374(4)   |
| O(3A)-C(4A)   | 1.236(3)   |
| C(3A)-C(4A)   | 1.447(4)   |
| C(3A)-C(11A)  | 1.498(4)   |
| C(4A)-C(10A)  | 1.491(4)   |
| C(5A)-C(6A)   | 1.373(4)   |
| C(5A)-C(10A)  | 1.388(4)   |
| C(5A)-H(5A)   | 0.9300     |
| C(6A)-C(7A)   | 1.384(4)   |
| C(6A)-H(6A)   | 0.9300     |
| C(7A)-C(8A)   | 1.380(4)   |
| C(7A)-H(7A)   | 0.9300     |
| C(8A)-C(9A)   | 1.382(4)   |
| C(8A)-H(8A)   | 0.9300     |
| C(9A)-C(10A)  | 1.395(3)   |
| C(11A)-H(11A) | 0.9600     |
| C(11A)-H(11B) | 0.9600     |
| C(11A)-H(11C) | 0.9600     |
| O(1B)-C(1B)   | 1.233(3)   |
| C(1B)-C(9B)   | 1.476(4)   |
| C(1B)-C(2B)   | 1.494(3)   |

|               |            |
|---------------|------------|
| O(2B)-C(2B)   | 1.302(3)   |
| C(2B)-C(3B)   | 1.368(4)   |
| O(3B)-C(4B)   | 1.225(3)   |
| C(3B)-C(4B)   | 1.450(4)   |
| C(3B)-C(11B)  | 1.492(4)   |
| C(4B)-C(10B)  | 1.492(4)   |
| C(5B)-C(6B)   | 1.367(5)   |
| C(5B)-C(10B)  | 1.394(4)   |
| C(5B)-H(5B)   | 0.9300     |
| C(6B)-C(7B)   | 1.384(5)   |
| C(6B)-H(6B)   | 0.9300     |
| C(7B)-C(8B)   | 1.381(5)   |
| C(7B)-H(7B)   | 0.9300     |
| C(8B)-C(9B)   | 1.387(4)   |
| C(8B)-H(8B)   | 0.9300     |
| C(9B)-C(10B)  | 1.387(4)   |
| C(11B)-H(11D) | 0.9600     |
| C(11B)-H(11E) | 0.9600     |
| C(11B)-H(11F) | 0.9600     |
| Mn(2)-O(2C)   | 2.1102(18) |
| Mn(2)-O(2D)   | 2.1359(19) |
| Mn(2)-O(4C)   | 2.156(2)   |
| Mn(2)-O(4D)   | 2.159(2)   |
| Mn(2)-O(1D)   | 2.2160(19) |
| Mn(2)-O(1C)   | 2.3303(19) |
| O(4C)-H(4CA)  | 0.804(17)  |
| O(4C)-H(4CB)  | 0.828(17)  |
| O(4D)-H(4DA)  | 0.786(11)  |
| O(4D)-H(4DB)  | 0.822(17)  |
| O(1C)-C(1C)   | 1.229(3)   |
| C(1C)-C(9C)   | 1.469(4)   |
| C(1C)-C(2C)   | 1.507(4)   |
| O(2C)-C(2C)   | 1.291(3)   |
| C(2C)-C(3C)   | 1.364(4)   |
| O(3C)-C(4C)   | 1.239(3)   |
| C(3C)-C(4C)   | 1.439(4)   |
| C(3C)-C(11C)  | 1.501(4)   |

|               |          |
|---------------|----------|
| C(4C)-C(10C)  | 1.491(4) |
| C(5C)-C(10C)  | 1.385(4) |
| C(5C)-C(6C)   | 1.386(5) |
| C(5C)-H(5C)   | 0.9300   |
| C(6C)-C(7C)   | 1.376(5) |
| C(6C)-H(6C)   | 0.9300   |
| C(7C)-C(8C)   | 1.389(4) |
| C(7C)-H(7C)   | 0.9300   |
| C(8C)-C(9C)   | 1.389(4) |
| C(8C)-H(8C)   | 0.9300   |
| C(9C)-C(10C)  | 1.400(4) |
| C(11C)-H(11G) | 0.9600   |
| C(11C)-H(11H) | 0.9600   |
| C(11C)-H(11I) | 0.9600   |
| O(1D)-C(1D)   | 1.225(3) |
| C(1D)-C(9D)   | 1.467(4) |
| C(1D)-C(2D)   | 1.502(3) |
| O(2D)-C(2D)   | 1.300(3) |
| C(2D)-C(3D)   | 1.369(4) |
| O(3D)-C(4D)   | 1.233(3) |
| C(3D)-C(4D)   | 1.445(4) |
| C(3D)-C(11D)  | 1.499(4) |
| C(4D)-C(10D)  | 1.496(4) |
| C(5D)-C(6D)   | 1.376(4) |
| C(5D)-C(10D)  | 1.390(4) |
| C(5D)-H(5D)   | 0.9300   |
| C(6D)-C(7D)   | 1.375(5) |
| C(6D)-H(6D)   | 0.9300   |
| C(7D)-C(8D)   | 1.378(4) |
| C(7D)-H(7D)   | 0.9300   |
| C(8D)-C(9D)   | 1.386(4) |
| C(8D)-H(8D)   | 0.9300   |
| C(9D)-C(10D)  | 1.393(4) |
| C(11D)-H(11J) | 0.9600   |
| C(11D)-H(11K) | 0.9600   |
| C(11D)-H(11L) | 0.9600   |
| O(1W)-H(1W1)  | 0.8142   |

|                     |            |
|---------------------|------------|
| O(1W)-H(1W2)        | 0.8165     |
| O(2W)-H(2W1)        | 0.8333     |
| O(2W)-H(2W2)        | 0.8378     |
| O(1WA)-H(1W3)       | 0.8296     |
| O(1WA)-H(1W4)       | 0.8251     |
| O(2WA)-H(2W3)       | 0.8382     |
| O(2WA)-H(2W4)       | 0.8312     |
| O(1WB)-H(1W5)       | 0.8232     |
| O(1WB)-H(1W6)       | 0.8235     |
| O(2WB)-H(2W5)       | 0.8297     |
| O(2WB)-H(2W6)       | 0.8238     |
|                     |            |
| O(2B)-Mn(1)-O(4B)   | 88.63(8)   |
| O(2B)-Mn(1)-O(4A)   | 102.90(9)  |
| O(4B)-Mn(1)-O(4A)   | 87.26(10)  |
| O(2B)-Mn(1)-O(2A)   | 111.74(7)  |
| O(4B)-Mn(1)-O(2A)   | 159.59(8)  |
| O(4A)-Mn(1)-O(2A)   | 86.95(8)   |
| O(2B)-Mn(1)-O(1A)   | 158.55(7)  |
| O(4B)-Mn(1)-O(1A)   | 88.47(8)   |
| O(4A)-Mn(1)-O(1A)   | 98.18(9)   |
| O(2A)-Mn(1)-O(1A)   | 73.03(7)   |
| O(2B)-Mn(1)-O(1B)   | 72.89(7)   |
| O(4B)-Mn(1)-O(1B)   | 92.87(8)   |
| O(4A)-Mn(1)-O(1B)   | 175.77(9)  |
| O(2A)-Mn(1)-O(1B)   | 94.33(7)   |
| O(1A)-Mn(1)-O(1B)   | 86.05(7)   |
| Mn(1)-O(4A)-H(4AA)  | 118(3)     |
| Mn(1)-O(4A)-H(4AB)  | 107(2)     |
| H(4AA)-O(4A)-H(4AB) | 110(3)     |
| Mn(1)-O(4B)-H(4BA)  | 130(2)     |
| Mn(1)-O(4B)-H(4BB)  | 126(2)     |
| H(4BA)-O(4B)-H(4BB) | 104(2)     |
| C(1A)-O(1A)-Mn(1)   | 116.20(17) |
| O(1A)-C(1A)-C(9A)   | 121.7(2)   |
| O(1A)-C(1A)-C(2A)   | 118.1(2)   |
| C(9A)-C(1A)-C(2A)   | 120.3(2)   |

|                      |            |
|----------------------|------------|
| C(2A)-O(2A)-Mn(1)    | 117.78(16) |
| O(2A)-C(2A)-C(3A)    | 125.8(2)   |
| O(2A)-C(2A)-C(1A)    | 114.7(2)   |
| C(3A)-C(2A)-C(1A)    | 119.5(2)   |
| C(2A)-C(3A)-C(4A)    | 120.8(2)   |
| C(2A)-C(3A)-C(11A)   | 121.1(3)   |
| C(4A)-C(3A)-C(11A)   | 118.0(2)   |
| O(3A)-C(4A)-C(3A)    | 121.8(3)   |
| O(3A)-C(4A)-C(10A)   | 118.0(3)   |
| C(3A)-C(4A)-C(10A)   | 120.2(2)   |
| C(6A)-C(5A)-C(10A)   | 120.8(3)   |
| C(6A)-C(5A)-H(5A)    | 119.6      |
| C(10A)-C(5A)-H(5A)   | 119.6      |
| C(5A)-C(6A)-C(7A)    | 120.0(3)   |
| C(5A)-C(6A)-H(6A)    | 120.0      |
| C(7A)-C(6A)-H(6A)    | 120.0      |
| C(8A)-C(7A)-C(6A)    | 120.1(3)   |
| C(8A)-C(7A)-H(7A)    | 119.9      |
| C(6A)-C(7A)-H(7A)    | 119.9      |
| C(7A)-C(8A)-C(9A)    | 119.8(3)   |
| C(7A)-C(8A)-H(8A)    | 120.1      |
| C(9A)-C(8A)-H(8A)    | 120.1      |
| C(8A)-C(9A)-C(10A)   | 120.5(2)   |
| C(8A)-C(9A)-C(1A)    | 120.7(2)   |
| C(10A)-C(9A)-C(1A)   | 118.8(2)   |
| C(5A)-C(10A)-C(9A)   | 118.7(3)   |
| C(5A)-C(10A)-C(4A)   | 120.9(2)   |
| C(9A)-C(10A)-C(4A)   | 120.4(2)   |
| C(3A)-C(11A)-H(11A)  | 109.5      |
| C(3A)-C(11A)-H(11B)  | 109.5      |
| H(11A)-C(11A)-H(11B) | 109.5      |
| C(3A)-C(11A)-H(11C)  | 109.5      |
| H(11A)-C(11A)-H(11C) | 109.5      |
| H(11B)-C(11A)-H(11C) | 109.5      |
| C(1B)-O(1B)-Mn(1)    | 114.27(16) |
| O(1B)-C(1B)-C(9B)    | 121.6(2)   |
| O(1B)-C(1B)-C(2B)    | 118.6(2)   |

|                      |            |
|----------------------|------------|
| C(9B)-C(1B)-C(2B)    | 119.8(2)   |
| C(2B)-O(2B)-Mn(1)    | 119.51(16) |
| O(2B)-C(2B)-C(3B)    | 125.4(2)   |
| O(2B)-C(2B)-C(1B)    | 114.5(2)   |
| C(3B)-C(2B)-C(1B)    | 120.1(2)   |
| C(2B)-C(3B)-C(4B)    | 120.8(2)   |
| C(2B)-C(3B)-C(11B)   | 121.8(3)   |
| C(4B)-C(3B)-C(11B)   | 117.3(2)   |
| O(3B)-C(4B)-C(3B)    | 121.7(3)   |
| O(3B)-C(4B)-C(10B)   | 118.6(3)   |
| C(3B)-C(4B)-C(10B)   | 119.7(2)   |
| C(6B)-C(5B)-C(10B)   | 120.4(3)   |
| C(6B)-C(5B)-H(5B)    | 119.8      |
| C(10B)-C(5B)-H(5B)   | 119.8      |
| C(5B)-C(6B)-C(7B)    | 120.2(3)   |
| C(5B)-C(6B)-H(6B)    | 119.9      |
| C(7B)-C(6B)-H(6B)    | 119.9      |
| C(8B)-C(7B)-C(6B)    | 120.1(3)   |
| C(8B)-C(7B)-H(7B)    | 119.9      |
| C(6B)-C(7B)-H(7B)    | 119.9      |
| C(7B)-C(8B)-C(9B)    | 119.8(3)   |
| C(7B)-C(8B)-H(8B)    | 120.1      |
| C(9B)-C(8B)-H(8B)    | 120.1      |
| C(10B)-C(9B)-C(8B)   | 120.0(3)   |
| C(10B)-C(9B)-C(1B)   | 119.1(2)   |
| C(8B)-C(9B)-C(1B)    | 120.8(3)   |
| C(9B)-C(10B)-C(5B)   | 119.4(3)   |
| C(9B)-C(10B)-C(4B)   | 120.4(2)   |
| C(5B)-C(10B)-C(4B)   | 120.2(3)   |
| C(3B)-C(11B)-H(11D)  | 109.5      |
| C(3B)-C(11B)-H(11E)  | 109.5      |
| H(11D)-C(11B)-H(11E) | 109.5      |
| C(3B)-C(11B)-H(11F)  | 109.5      |
| H(11D)-C(11B)-H(11F) | 109.5      |
| H(11E)-C(11B)-H(11F) | 109.5      |
| O(2C)-Mn(2)-O(2D)    | 106.19(8)  |
| O(2C)-Mn(2)-O(4C)    | 90.48(9)   |

|                     |            |
|---------------------|------------|
| O(2D)-Mn(2)-O(4C)   | 160.16(9)  |
| O(2C)-Mn(2)-O(4D)   | 93.98(8)   |
| O(2D)-Mn(2)-O(4D)   | 92.04(8)   |
| O(4C)-Mn(2)-O(4D)   | 97.56(9)   |
| O(2C)-Mn(2)-O(1D)   | 167.10(8)  |
| O(2D)-Mn(2)-O(1D)   | 74.21(7)   |
| O(4C)-Mn(2)-O(1D)   | 87.13(8)   |
| O(4D)-Mn(2)-O(1D)   | 98.90(8)   |
| O(2C)-Mn(2)-O(1C)   | 72.85(7)   |
| O(2D)-Mn(2)-O(1C)   | 90.28(7)   |
| O(4C)-Mn(2)-O(1C)   | 84.34(8)   |
| O(4D)-Mn(2)-O(1C)   | 166.74(8)  |
| O(1D)-Mn(2)-O(1C)   | 94.29(7)   |
| Mn(2)-O(4C)-H(4CA)  | 127(2)     |
| Mn(2)-O(4C)-H(4CB)  | 125(2)     |
| H(4CA)-O(4C)-H(4CB) | 106(3)     |
| Mn(2)-O(4D)-H(4DA)  | 114(3)     |
| Mn(2)-O(4D)-H(4DB)  | 120(3)     |
| H(4DA)-O(4D)-H(4DB) | 107(2)     |
| C(1C)-O(1C)-Mn(2)   | 112.32(17) |
| O(1C)-C(1C)-C(9C)   | 122.0(2)   |
| O(1C)-C(1C)-C(2C)   | 118.3(2)   |
| C(9C)-C(1C)-C(2C)   | 119.7(2)   |
| C(2C)-O(2C)-Mn(2)   | 118.45(16) |
| O(2C)-C(2C)-C(3C)   | 124.8(2)   |
| O(2C)-C(2C)-C(1C)   | 115.0(2)   |
| C(3C)-C(2C)-C(1C)   | 120.0(2)   |
| C(2C)-C(3C)-C(4C)   | 120.4(2)   |
| C(2C)-C(3C)-C(11C)  | 121.0(3)   |
| C(4C)-C(3C)-C(11C)  | 118.5(2)   |
| O(3C)-C(4C)-C(3C)   | 120.4(3)   |
| O(3C)-C(4C)-C(10C)  | 119.1(3)   |
| C(3C)-C(4C)-C(10C)  | 120.5(2)   |
| C(10C)-C(5C)-C(6C)  | 120.3(3)   |
| C(10C)-C(5C)-H(5C)  | 119.8      |
| C(6C)-C(5C)-H(5C)   | 119.8      |
| C(7C)-C(6C)-C(5C)   | 120.7(3)   |



|                      |            |
|----------------------|------------|
| C(7C)-C(6C)-H(6C)    | 119.7      |
| C(5C)-C(6C)-H(6C)    | 119.7      |
| C(6C)-C(7C)-C(8C)    | 119.9(3)   |
| C(6C)-C(7C)-H(7C)    | 120.0      |
| C(8C)-C(7C)-H(7C)    | 120.0      |
| C(7C)-C(8C)-C(9C)    | 119.6(3)   |
| C(7C)-C(8C)-H(8C)    | 120.2      |
| C(9C)-C(8C)-H(8C)    | 120.2      |
| C(8C)-C(9C)-C(10C)   | 120.5(2)   |
| C(8C)-C(9C)-C(1C)    | 121.1(2)   |
| C(10C)-C(9C)-C(1C)   | 118.4(2)   |
| C(5C)-C(10C)-C(9C)   | 118.9(3)   |
| C(5C)-C(10C)-C(4C)   | 120.9(3)   |
| C(9C)-C(10C)-C(4C)   | 120.2(2)   |
| C(3C)-C(11C)-H(11G)  | 109.5      |
| C(3C)-C(11C)-H(11H)  | 109.5      |
| H(11G)-C(11C)-H(11H) | 109.5      |
| C(3C)-C(11C)-H(11I)  | 109.5      |
| H(11G)-C(11C)-H(11I) | 109.5      |
| H(11H)-C(11C)-H(11I) | 109.5      |
| C(1D)-O(1D)-Mn(2)    | 114.94(16) |
| O(1D)-C(1D)-C(9D)    | 121.7(2)   |
| O(1D)-C(1D)-C(2D)    | 118.6(2)   |
| C(9D)-C(1D)-C(2D)    | 119.7(2)   |
| C(2D)-O(2D)-Mn(2)    | 117.10(15) |
| O(2D)-C(2D)-C(3D)    | 125.6(2)   |
| O(2D)-C(2D)-C(1D)    | 114.3(2)   |
| C(3D)-C(2D)-C(1D)    | 120.1(2)   |
| C(2D)-C(3D)-C(4D)    | 121.0(2)   |
| C(2D)-C(3D)-C(11D)   | 121.6(3)   |
| C(4D)-C(3D)-C(11D)   | 117.5(2)   |
| O(3D)-C(4D)-C(3D)    | 121.7(3)   |
| O(3D)-C(4D)-C(10D)   | 118.9(3)   |
| C(3D)-C(4D)-C(10D)   | 119.3(2)   |
| C(6D)-C(5D)-C(10D)   | 119.9(3)   |
| C(6D)-C(5D)-H(5D)    | 120.0      |
| C(10D)-C(5D)-H(5D)   | 120.0      |

|                      |          |
|----------------------|----------|
| C(7D)-C(6D)-C(5D)    | 120.8(3) |
| C(7D)-C(6D)-H(6D)    | 119.6    |
| C(5D)-C(6D)-H(6D)    | 119.6    |
| C(6D)-C(7D)-C(8D)    | 120.2(3) |
| C(6D)-C(7D)-H(7D)    | 119.9    |
| C(8D)-C(7D)-H(7D)    | 119.9    |
| C(7D)-C(8D)-C(9D)    | 119.4(3) |
| C(7D)-C(8D)-H(8D)    | 120.3    |
| C(9D)-C(8D)-H(8D)    | 120.3    |
| C(8D)-C(9D)-C(10D)   | 120.7(2) |
| C(8D)-C(9D)-C(1D)    | 120.4(2) |
| C(10D)-C(9D)-C(1D)   | 118.9(2) |
| C(5D)-C(10D)-C(9D)   | 118.9(3) |
| C(5D)-C(10D)-C(4D)   | 120.2(3) |
| C(9D)-C(10D)-C(4D)   | 120.8(2) |
| C(3D)-C(11D)-H(11J)  | 109.5    |
| C(3D)-C(11D)-H(11K)  | 109.5    |
| H(11J)-C(11D)-H(11K) | 109.5    |
| C(3D)-C(11D)-H(11L)  | 109.5    |
| H(11J)-C(11D)-H(11L) | 109.5    |
| H(11K)-C(11D)-H(11L) | 109.5    |
| H(1W1)-O(1W)-H(1W2)  | 106.7    |
| H(2W1)-O(2W)-H(2W2)  | 101.0    |
| H(1W3)-O(1WA)-H(1W4) | 103.2    |
| H(2W3)-O(2WA)-H(2W4) | 101.3    |
| H(1W5)-O(1WB)-H(1W6) | 104.2    |
| H(2W5)-O(2WB)-H(2W6) | 103.0    |

---

Symmetry transformations used to generate equivalent atoms:

**Table S11.** Crystal data and structure refinement for **1B**

|                                   |                                                   |                |
|-----------------------------------|---------------------------------------------------|----------------|
| Identification code               | shelx                                             |                |
| Empirical formula                 | C <sub>23</sub> H <sub>22</sub> Mn O <sub>9</sub> |                |
| Formula weight                    | 497.34                                            |                |
| Temperature                       | 298(2) K                                          |                |
| Wavelength                        | 0.71073 Å                                         |                |
| Crystal system                    | Monoclinic                                        |                |
| Space group                       | P 21/c                                            |                |
| Unit cell dimensions              | a = 8.0352(16) Å                                  | α = 90°        |
|                                   | b = 17.307(4) Å                                   | β = 104.09(3)° |
|                                   | c = 15.532(3) Å                                   | γ = 90°        |
| Volume                            | 2095.0(8) Å <sup>3</sup>                          |                |
| Z                                 | 4                                                 |                |
| Density (calculated)              | 1.577 Mg/m <sup>3</sup>                           |                |
| Absorption coefficient            | 0.686 mm <sup>-1</sup>                            |                |
| F(000)                            | 1028                                              |                |
| Crystal size                      | 0.21 x 0.13 x 0.10 mm <sup>3</sup>                |                |
| Theta range for data collection   | 2.885 to 25.251°                                  |                |
| Index ranges                      | -9<=h<=9, -20<=k<=20, -18<=l<=17                  |                |
| Reflections collected             | 11458                                             |                |
| Independent reflections           | 3539 [R(int) = 0.1707]                            |                |
| Completeness to theta = 25.242°   | 93.2 %                                            |                |
| Absorption correction             | Semi-empirical from equivalents                   |                |
| Max. and min. transmission        | 0.792 and 0.731                                   |                |
| Refinement method                 | Full-matrix least-squares on F <sup>2</sup>       |                |
| Data / restraints / parameters    | 3539 / 8 / 316                                    |                |
| Goodness-of-fit on F <sup>2</sup> | 1.012                                             |                |
| Final R indices [I>2sigma(I)]     | R1 = 0.0792, wR2 = 0.1385                         |                |
| R indices (all data)              | R1 = 0.2059, wR2 = 0.1787                         |                |
| Extinction coefficient            | n/a                                               |                |
| Largest diff. peak and hole       | 0.448 and -0.429 e.Å <sup>-3</sup>                |                |

**Table S12.** Anisotropic displacement parameters ( $\text{\AA}^2 \times 10^3$ ) for **1B**. The anisotropic displacement factor exponent takes the form:  $-2 \pi^2 [ h^2 a^* 2U^{11} + \dots + 2 h k a^* b^* U^{12} ]$

|        | U11   | U22   | U33    | U23    | U13    | U12   |
|--------|-------|-------|--------|--------|--------|-------|
| Mn(1)  | 24(1) | 24(1) | 43(1)  | -1(1)  | 2(1)   | 4(1)  |
| O(4A)  | 43(2) | 32(1) | 111(2) | 18(1)  | -12(1) | 4(1)  |
| O(4B)  | 37(1) | 50(1) | 52(1)  | -22(1) | -10(1) | 18(1) |
| O(1A)  | 24(1) | 45(1) | 38(1)  | -2(1)  | -2(1)  | 3(1)  |
| C(1A)  | 23(1) | 16(1) | 40(2)  | 0(1)   | -1(1)  | 1(1)  |
| O(2A)  | 29(1) | 32(1) | 36(1)  | -1(1)  | 3(1)   | 1(1)  |
| C(2A)  | 29(2) | 15(1) | 37(2)  | 1(1)   | 0(1)   | -1(1) |
| O(3A)  | 28(1) | 50(1) | 54(1)  | -5(1)  | -11(1) | -4(1) |
| C(3A)  | 32(2) | 22(1) | 35(2)  | 2(1)   | -3(1)  | -3(1) |
| C(4A)  | 29(2) | 16(1) | 47(2)  | -1(1)  | -7(1)  | -2(1) |
| C(5A)  | 23(2) | 30(2) | 60(2)  | -1(1)  | 4(1)   | -4(1) |
| C(6A)  | 38(2) | 42(2) | 56(2)  | -2(2)  | 18(2)  | -1(1) |
| C(7A)  | 47(2) | 51(2) | 41(2)  | -1(2)  | 8(2)   | -3(2) |
| C(8A)  | 29(2) | 43(2) | 43(2)  | 1(1)   | 2(1)   | -1(1) |
| C(9A)  | 25(1) | 21(1) | 38(2)  | 2(1)   | 0(1)   | -2(1) |
| C(10A) | 25(1) | 15(1) | 43(2)  | 1(1)   | 0(1)   | -2(1) |
| C(11A) | 42(2) | 55(2) | 44(2)  | -2(2)  | -4(2)  | -6(2) |
| O(1B)  | 32(1) | 27(1) | 51(1)  | 0(1)   | 13(1)  | 2(1)  |
| C(1B)  | 24(1) | 26(1) | 32(1)  | -2(1)  | -1(1)  | 1(1)  |
| O(2B)  | 31(1) | 22(1) | 44(1)  | 1(1)   | 8(1)   | -2(1) |
| C(2B)  | 23(1) | 26(1) | 27(1)  | -2(1)  | -2(1)  | -1(1) |
| O(3B)  | 63(2) | 44(1) | 72(2)  | -16(1) | 27(1)  | 11(1) |
| C(3B)  | 31(2) | 33(2) | 28(1)  | -2(1)  | 1(1)   | -1(1) |
| C(4B)  | 31(2) | 35(2) | 36(2)  | -8(1)  | -2(1)  | 7(1)  |
| C(5B)  | 49(2) | 28(2) | 54(2)  | -5(2)  | -6(2)  | 8(2)  |
| C(6B)  | 72(3) | 25(2) | 78(3)  | 8(2)   | -4(2)  | -2(2) |
| C(7B)  | 63(2) | 40(2) | 92(3)  | 21(2)  | 13(2)  | -7(2) |
| C(8B)  | 42(2) | 34(2) | 65(2)  | 10(2)  | 12(2)  | 3(1)  |
| C(9B)  | 28(2) | 24(1) | 39(2)  | 5(1)   | -2(1)  | 2(1)  |
| C(10B) | 30(2) | 28(2) | 35(2)  | -2(1)  | -8(1)  | 3(1)  |
| C(11B) | 55(2) | 49(2) | 49(2)  | 1(2)   | 21(2)  | 0(2)  |
| Mn(2)  | 28(1) | 29(1) | 36(1)  | 7(1)   | 5(1)   | -1(1) |

|        |        |        |        |       |        |        |
|--------|--------|--------|--------|-------|--------|--------|
| O(4C)  | 58(2)  | 51(2)  | 41(1)  | 13(1) | -14(1) | -15(1) |
| O(4D)  | 60(2)  | 32(1)  | 58(2)  | 5(1)  | 17(1)  | -1(1)  |
| O(1C)  | 30(1)  | 32(1)  | 48(1)  | 4(1)  | 14(1)  | 0(1)   |
| C(1C)  | 26(1)  | 31(2)  | 25(1)  | 0(1)  | -1(1)  | -1(1)  |
| O(2C)  | 31(1)  | 27(1)  | 56(1)  | 1(1)  | 13(1)  | 0(1)   |
| C(2C)  | 23(1)  | 29(2)  | 31(2)  | 0(1)  | -2(1)  | 1(1)   |
| O(3C)  | 41(1)  | 60(2)  | 67(2)  | 29(1) | 20(1)  | 1(1)   |
| C(3C)  | 24(1)  | 37(2)  | 29(2)  | 1(1)  | 1(1)   | 0(1)   |
| C(4C)  | 21(1)  | 43(2)  | 36(2)  | 11(1) | -3(1)  | -5(1)  |
| C(5C)  | 43(2)  | 34(2)  | 48(2)  | 9(1)  | -7(2)  | -12(1) |
| C(6C)  | 63(2)  | 25(2)  | 56(2)  | -1(2) | -15(2) | -6(2)  |
| C(7C)  | 55(2)  | 35(2)  | 47(2)  | -9(2) | -9(2)  | 9(2)   |
| C(8C)  | 39(2)  | 35(2)  | 38(2)  | -2(1) | -1(1)  | 4(1)   |
| C(9C)  | 28(2)  | 27(1)  | 29(1)  | 0(1)  | -5(1)  | -2(1)  |
| C(10C) | 25(1)  | 34(2)  | 32(2)  | 6(1)  | -7(1)  | -6(1)  |
| C(11C) | 46(2)  | 55(2)  | 52(2)  | -2(2) | 19(2)  | 2(2)   |
| O(1D)  | 28(1)  | 52(1)  | 30(1)  | 5(1)  | 1(1)   | -1(1)  |
| C(1D)  | 30(2)  | 18(1)  | 30(2)  | 2(1)  | 0(1)   | 0(1)   |
| O(2D)  | 26(1)  | 37(1)  | 38(1)  | 7(1)  | 1(1)   | 0(1)   |
| C(2D)  | 29(2)  | 16(1)  | 36(2)  | 5(1)  | 1(1)   | -2(1)  |
| O(3D)  | 67(2)  | 48(1)  | 30(1)  | -4(1) | 6(1)   | -1(1)  |
| C(3D)  | 38(2)  | 21(1)  | 33(2)  | 2(1)  | -5(1)  | -3(1)  |
| C(4D)  | 49(2)  | 18(1)  | 32(2)  | 0(1)  | 3(1)   | -3(1)  |
| C(5D)  | 49(2)  | 28(2)  | 47(2)  | 0(1)  | 19(2)  | 1(1)   |
| C(6D)  | 34(2)  | 41(2)  | 67(2)  | 0(2)  | 19(2)  | -1(1)  |
| C(7D)  | 27(2)  | 53(2)  | 64(2)  | 5(2)  | 4(2)   | -5(2)  |
| C(8D)  | 35(2)  | 40(2)  | 40(2)  | 5(1)  | 2(1)   | -2(1)  |
| C(9D)  | 30(2)  | 18(1)  | 37(2)  | 2(1)  | 4(1)   | -1(1)  |
| C(10D) | 37(2)  | 14(1)  | 38(2)  | -1(1) | 7(1)   | -1(1)  |
| C(11D) | 47(2)  | 47(2)  | 40(2)  | 0(2)  | -11(2) | -5(2)  |
| O(20)  | 179(6) | 128(5) | 198(6) | 1(4)  | 130(5) | 3(4)   |
| O(20') | 179(6) | 128(5) | 198(6) | 1(4)  | 130(5) | 3(4)   |

---

**Table S13.** Atomic coordinates ( $\times 10^4$ ) and equivalent isotropic displacement parameters ( $\text{\AA}^2 \times 10^3$ ) for **1B**.  $U(\text{eq})$  is defined as one third of the trace of the orthogonalized  $U_{ij}$  tensor

|       | x        | y        | z       | U(eq) |
|-------|----------|----------|---------|-------|
| Mn    | 2823(2)  | 7484(1)  | 5576(1) | 37(1) |
| O(1)  | 3181(6)  | 8250(2)  | 4588(3) | 40(1) |
| O(2)  | 2326(6)  | 8722(2)  | 6023(3) | 44(2) |
| O(3)  | 3435(7)  | 10826(2) | 3724(3) | 55(2) |
| O(4)  | 1470(6)  | 6734(2)  | 4556(3) | 45(2) |
| O(5)  | 3799(6)  | 6260(2)  | 5953(3) | 48(2) |
| O(6)  | 374(7)   | 4164(2)  | 3682(3) | 52(2) |
| O(1M) | 5395(7)  | 7723(2)  | 6323(4) | 62(2) |
| O(1W) | 1019(8)  | 7274(3)  | 6325(3) | 56(2) |
| O(2W) | 1633(11) | 7515(3)  | 8031(3) | 83(2) |
| C(1M) | 6520(10) | 7361(4)  | 7044(5) | 66(3) |
| C(1)  | 2996(8)  | 8989(3)  | 4675(5) | 29(2) |
| C(2)  | 2507(9)  | 9228(4)  | 5494(5) | 33(2) |
| C(3)  | 2133(9)  | 10051(4) | 5626(5) | 33(2) |
| C(4)  | 1554(9)  | 10267(4) | 6331(5) | 44(2) |
| C(5)  | 1134(10) | 11048(4) | 6438(6) | 58(3) |
| C(6)  | 1415(10) | 11573(4) | 5821(6) | 58(3) |
| C(7)  | 2020(10) | 11345(4) | 5110(6) | 49(2) |
| C(8)  | 2417(9)  | 10578(4) | 4989(5) | 35(2) |
| C(9)  | 3060(9)  | 10331(4) | 4236(5) | 35(2) |
| C(10) | 3271(8)  | 9519(3)  | 4071(5) | 32(2) |
| C(11) | 3777(10) | 9288(4)  | 3256(5) | 51(2) |
| C(12) | 1720(9)  | 6001(4)  | 4636(4) | 32(2) |
| C(13) | 3059(9)  | 5751(3)  | 5435(5) | 31(2) |
| C(14) | 3432(9)  | 4936(4)  | 5591(4) | 31(2) |
| C(15) | 4707(9)  | 4694(4)  | 6320(5) | 44(2) |
| C(16) | 5101(10) | 3915(4)  | 6429(5) | 50(2) |
| C(17) | 4205(11) | 3387(4)  | 5827(6) | 61(3) |
| C(18) | 2947(11) | 3620(4)  | 5129(5) | 51(2) |
| C(19) | 2533(9)  | 4399(3)  | 5010(5) | 37(2) |
| C(20) | 1202(9)  | 4649(4)  | 4194(5) | 35(2) |
| C(21) | 862(9)   | 5456(3)  | 4049(5) | 36(2) |

C(22)

-434(10)

5709(3)

3240(5)

46(2)

---

**Table S14.** Bond lengths [ $\text{\AA}$ ] and angles [ $^\circ$ ] for **1B**

---

|              |           |
|--------------|-----------|
| Mn-O(1)      | 2.099(4)  |
| Mn-O(1W)     | 2.100(6)  |
| Mn-O(4)      | 2.130(4)  |
| Mn-O(1M)     | 2.149(5)  |
| Mn-O(5)      | 2.286(4)  |
| Mn-O(2)      | 2.317(4)  |
| O(1)-C(1)    | 1.298(6)  |
| O(2)-C(2)    | 1.233(7)  |
| O(3)-C(9)    | 1.255(8)  |
| O(4)-C(12)   | 1.285(7)  |
| O(5)-C(13)   | 1.242(7)  |
| O(6)-C(20)   | 1.232(7)  |
| O(1M)-C(1M)  | 1.404(7)  |
| O(1M)-H(1M)  | 0.82(2)   |
| O(1W)-H(1W1) | 0.84(2)   |
| O(1W)-H(1W2) | 0.80(2)   |
| O(2W)-H(2W1) | 0.83(2)   |
| O(2W)-H(2W2) | 0.82(2)   |
| C(1M)-H(1MA) | 0.9600    |
| C(1M)-H(1MB) | 0.9600    |
| C(1M)-H(1MC) | 0.9600    |
| C(1)-C(10)   | 1.368(8)  |
| C(1)-C(2)    | 1.480(9)  |
| C(2)-C(3)    | 1.480(8)  |
| C(3)-C(4)    | 1.343(9)  |
| C(3)-C(8)    | 1.404(9)  |
| C(4)-C(5)    | 1.413(9)  |
| C(4)-H(4A)   | 0.9300    |
| C(5)-C(6)    | 1.378(10) |
| C(5)-H(5A)   | 0.9300    |
| C(6)-C(7)    | 1.368(10) |
| C(6)-H(6A)   | 0.9300    |
| C(7)-C(8)    | 1.388(8)  |
| C(7)-H(7A)   | 0.9300    |
| C(8)-C(9)    | 1.453(10) |



|                |            |
|----------------|------------|
| C(9)-C(10)     | 1.446(8)   |
| C(10)-C(11)    | 1.475(9)   |
| C(11)-H(11A)   | 0.9600     |
| C(11)-H(11B)   | 0.9600     |
| C(11)-H(11C)   | 0.9600     |
| C(12)-C(21)    | 1.375(8)   |
| C(12)-C(13)    | 1.495(9)   |
| C(13)-C(14)    | 1.452(8)   |
| C(14)-C(19)    | 1.371(8)   |
| C(14)-C(15)    | 1.393(9)   |
| C(15)-C(16)    | 1.387(8)   |
| C(15)-H(15A)   | 0.9300     |
| C(16)-C(17)    | 1.378(9)   |
| C(16)-H(16A)   | 0.9300     |
| C(17)-C(18)    | 1.352(10)  |
| C(17)-H(17A)   | 0.9300     |
| C(18)-C(19)    | 1.390(8)   |
| C(18)-H(18A)   | 0.9300     |
| C(19)-C(20)    | 1.509(9)   |
| C(20)-C(21)    | 1.432(8)   |
| C(21)-C(22)    | 1.489(8)   |
| C(22)-H(22A)   | 0.9600     |
| C(22)-H(22B)   | 0.9600     |
| C(22)-H(22C)   | 0.9600     |
| O(1)-Mn-O(1W)  | 138.6(2)   |
| O(1)-Mn-O(4)   | 88.70(16)  |
| O(1W)-Mn-O(4)  | 90.55(19)  |
| O(1)-Mn-O(1M)  | 89.3(2)    |
| O(1W)-Mn-O(1M) | 115.9(2)   |
| O(4)-Mn-O(1M)  | 140.2(2)   |
| O(1)-Mn-O(5)   | 132.32(19) |
| O(1W)-Mn-O(5)  | 86.4(2)    |
| O(4)-Mn-O(5)   | 72.94(16)  |
| O(1M)-Mn-O(5)  | 79.36(17)  |
| O(1)-Mn-O(2)   | 72.50(16)  |
| O(1W)-Mn-O(2)  | 78.58(18)  |

|                     |            |
|---------------------|------------|
| O(4)-Mn-O(2)        | 133.82(17) |
| O(1M)-Mn-O(2)       | 82.74(18)  |
| O(5)-Mn-O(2)        | 148.66(17) |
| C(1)-O(1)-Mn        | 120.5(4)   |
| C(2)-O(2)-Mn        | 113.6(5)   |
| C(12)-O(4)-Mn       | 119.4(4)   |
| C(13)-O(5)-Mn       | 114.2(4)   |
| C(1M)-O(1M)-Mn      | 133.8(4)   |
| C(1M)-O(1M)-H(1M)   | 115.3(18)  |
| Mn-O(1M)-H(1M)      | 110.8(18)  |
| Mn-O(1W)-H(1W1)     | 124(5)     |
| Mn-O(1W)-H(1W2)     | 130(5)     |
| H(1W1)-O(1W)-H(1W2) | 104(3)     |
| H(2W1)-O(2W)-H(2W2) | 103(3)     |
| O(1M)-C(1M)-H(1MA)  | 109.5      |
| O(1M)-C(1M)-H(1MB)  | 109.5      |
| H(1MA)-C(1M)-H(1MB) | 109.5      |
| O(1M)-C(1M)-H(1MC)  | 109.5      |
| H(1MA)-C(1M)-H(1MC) | 109.5      |
| H(1MB)-C(1M)-H(1MC) | 109.5      |
| O(1)-C(1)-C(10)     | 123.2(7)   |
| O(1)-C(1)-C(2)      | 115.2(5)   |
| C(10)-C(1)-C(2)     | 121.6(6)   |
| O(2)-C(2)-C(3)      | 122.1(7)   |
| O(2)-C(2)-C(1)      | 118.2(6)   |
| C(3)-C(2)-C(1)      | 119.6(6)   |
| C(4)-C(3)-C(8)      | 122.8(7)   |
| C(4)-C(3)-C(2)      | 120.2(7)   |
| C(8)-C(3)-C(2)      | 117.0(7)   |
| C(3)-C(4)-C(5)      | 120.2(8)   |
| C(3)-C(4)-H(4A)     | 119.9      |
| C(5)-C(4)-H(4A)     | 119.9      |
| C(6)-C(5)-C(4)      | 117.7(8)   |
| C(6)-C(5)-H(5A)     | 121.2      |
| C(4)-C(5)-H(5A)     | 121.2      |
| C(7)-C(6)-C(5)      | 121.4(8)   |
| C(7)-C(6)-H(6A)     | 119.3      |

|                     |          |
|---------------------|----------|
| C(5)-C(6)-H(6A)     | 119.3    |
| C(6)-C(7)-C(8)      | 121.6(8) |
| C(6)-C(7)-H(7A)     | 119.2    |
| C(8)-C(7)-H(7A)     | 119.2    |
| C(7)-C(8)-C(3)      | 116.3(8) |
| C(7)-C(8)-C(9)      | 121.9(7) |
| C(3)-C(8)-C(9)      | 121.8(7) |
| O(3)-C(9)-C(10)     | 119.6(8) |
| O(3)-C(9)-C(8)      | 119.8(7) |
| C(10)-C(9)-C(8)     | 120.6(7) |
| C(1)-C(10)-C(9)     | 119.0(7) |
| C(1)-C(10)-C(11)    | 122.1(6) |
| C(9)-C(10)-C(11)    | 119.0(6) |
| C(10)-C(11)-H(11A)  | 109.5    |
| C(10)-C(11)-H(11B)  | 109.5    |
| H(11A)-C(11)-H(11B) | 109.5    |
| C(10)-C(11)-H(11C)  | 109.5    |
| H(11A)-C(11)-H(11C) | 109.5    |
| H(11B)-C(11)-H(11C) | 109.5    |
| O(4)-C(12)-C(21)    | 124.9(6) |
| O(4)-C(12)-C(13)    | 115.5(5) |
| C(21)-C(12)-C(13)   | 119.7(6) |
| O(5)-C(13)-C(14)    | 122.3(6) |
| O(5)-C(13)-C(12)    | 117.9(6) |
| C(14)-C(13)-C(12)   | 119.8(6) |
| C(19)-C(14)-C(15)   | 119.8(6) |
| C(19)-C(14)-C(13)   | 119.7(6) |
| C(15)-C(14)-C(13)   | 120.5(6) |
| C(16)-C(15)-C(14)   | 119.4(7) |
| C(16)-C(15)-H(15A)  | 120.3    |
| C(14)-C(15)-H(15A)  | 120.3    |
| C(17)-C(16)-C(15)   | 119.8(7) |
| C(17)-C(16)-H(16A)  | 120.1    |
| C(15)-C(16)-H(16A)  | 120.1    |
| C(18)-C(17)-C(16)   | 120.7(7) |
| C(18)-C(17)-H(17A)  | 119.6    |
| C(16)-C(17)-H(17A)  | 119.6    |

|                     |          |
|---------------------|----------|
| C(17)-C(18)-C(19)   | 120.2(7) |
| C(17)-C(18)-H(18A)  | 119.9    |
| C(19)-C(18)-H(18A)  | 119.9    |
| C(14)-C(19)-C(18)   | 119.9(7) |
| C(14)-C(19)-C(20)   | 120.7(6) |
| C(18)-C(19)-C(20)   | 119.1(7) |
| O(6)-C(20)-C(21)    | 120.7(7) |
| O(6)-C(20)-C(19)    | 120.5(6) |
| C(21)-C(20)-C(19)   | 118.7(6) |
| C(12)-C(21)-C(20)   | 121.3(7) |
| C(12)-C(21)-C(22)   | 119.5(6) |
| C(20)-C(21)-C(22)   | 119.1(6) |
| C(21)-C(22)-H(22A)  | 109.5    |
| C(21)-C(22)-H(22B)  | 109.5    |
| H(22A)-C(22)-H(22B) | 109.5    |
| C(21)-C(22)-H(22C)  | 109.5    |
| H(22A)-C(22)-H(22C) | 109.5    |
| H(22B)-C(22)-H(22C) | 109.5    |

---

Symmetry transformations used to generate equivalent atoms:

**Table S15.** Anisotropic displacement parameters ( $\text{\AA}^2 \times 10^3$ ) for **1B**. The anisotropic displacement factor exponent takes the form:  $-2\pi^2[h^2a^*2U^{11} + \dots + 2hk a^* b^* U^{12}]$

|       | U11    | U22   | U33   | U23    | U13    | U12    |
|-------|--------|-------|-------|--------|--------|--------|
| Mn    | 56(1)  | 18(1) | 35(1) | 1(1)   | 6(1)   | -7(1)  |
| O(1)  | 60(4)  | 18(3) | 44(3) | -4(2)  | 14(3)  | -1(2)  |
| O(2)  | 71(4)  | 25(3) | 41(3) | 4(2)   | 23(3)  | -6(2)  |
| O(3)  | 76(4)  | 30(3) | 55(4) | 16(3)  | 9(3)   | -14(3) |
| O(4)  | 73(4)  | 13(2) | 40(3) | 2(2)   | 1(3)   | -2(2)  |
| O(5)  | 64(4)  | 21(3) | 56(4) | -3(2)  | 6(3)   | -7(2)  |
| O(6)  | 76(4)  | 31(3) | 44(3) | -12(2) | 4(3)   | -15(3) |
| O(1M) | 62(4)  | 29(3) | 78(4) | 17(3)  | -17(3) | -11(3) |
| O(1W) | 88(5)  | 24(3) | 55(4) | -9(2)  | 16(4)  | -21(3) |
| O(2W) | 151(6) | 43(3) | 49(4) | -1(3)  | 10(4)  | 8(4)   |
| C(1M) | 83(7)  | 51(6) | 50(5) | 13(4)  | -10(5) | -1(5)  |
| C(1)  | 33(5)  | 19(4) | 32(5) | 3(3)   | 5(4)   | -7(3)  |
| C(2)  | 24(5)  | 29(4) | 43(6) | -3(4)  | 2(4)   | -6(3)  |
| C(3)  | 33(5)  | 26(4) | 38(5) | -5(3)  | 6(4)   | -4(3)  |
| C(4)  | 40(5)  | 45(5) | 44(6) | -11(4) | 3(4)   | -7(4)  |
| C(5)  | 57(6)  | 40(5) | 75(7) | -18(5) | 13(5)  | 4(4)   |
| C(6)  | 60(7)  | 26(4) | 79(7) | -8(5)  | 1(6)   | 5(4)   |
| C(7)  | 56(6)  | 20(4) | 63(6) | -7(4)  | 3(5)   | 2(4)   |
| C(8)  | 26(5)  | 35(4) | 37(6) | 1(4)   | -4(4)  | -5(3)  |
| C(9)  | 28(5)  | 32(4) | 39(5) | 9(4)   | -5(4)  | 3(3)   |
| C(10) | 25(4)  | 30(4) | 38(5) | 6(3)   | 1(4)   | -2(3)  |
| C(11) | 83(7)  | 31(4) | 36(5) | 0(4)   | 11(5)  | -8(4)  |
| C(12) | 25(5)  | 35(4) | 33(5) | 1(3)   | 4(4)   | -1(3)  |
| C(13) | 33(5)  | 22(4) | 43(5) | 0(3)   | 19(4)  | -2(3)  |
| C(14) | 33(5)  | 31(4) | 32(5) | 2(3)   | 15(4)  | -4(3)  |
| C(15) | 42(5)  | 43(5) | 49(6) | 4(4)   | 14(5)  | -6(4)  |
| C(16) | 44(6)  | 32(4) | 71(6) | 16(4)  | 8(5)   | 12(4)  |
| C(17) | 80(7)  | 25(4) | 80(7) | 8(4)   | 22(6)  | 5(4)   |
| C(18) | 68(7)  | 25(4) | 58(6) | -7(4)  | 12(5)  | -3(4)  |
| C(19) | 35(5)  | 25(4) | 57(6) | 1(4)   | 25(5)  | -2(3)  |
| C(20) | 41(5)  | 30(4) | 35(5) | -4(3)  | 12(4)  | -13(4) |
| C(21) | 44(5)  | 27(4) | 36(5) | -3(3)  | 8(4)   | -6(3)  |

C(22) 57(6) 39(4) 41(5) 2(4) 11(5) -16(4)

---

**Table S16.** Hydrogen coordinates (  $\times 10^4$ ) and isotropic displacement parameters ( $\text{\AA}^2 \times 10^3$ ) for **1B**

|        | x         | y        | z        | U(eq) |
|--------|-----------|----------|----------|-------|
| H(1M)  | 5760(50)  | 8120(30) | 6140(30) | 75    |
| H(1W1) | 1140(90)  | 7420(40) | 6850(20) | 84    |
| H(1W2) | 260(70)   | 6960(40) | 6250(40) | 84    |
| H(2W1) | 1830(130) | 7200(30) | 8450(40) | 125   |
| H(2W2) | 1410(130) | 7920(30) | 8270(50) | 125   |
| H(1MA) | 7521      | 7677     | 7248     | 99    |
| H(1MB) | 6854      | 6867     | 6861     | 99    |
| H(1MC) | 5956      | 7291     | 7517     | 99    |
| H(4A)  | 1429      | 9902     | 6750     | 53    |
| H(5A)  | 684       | 11203    | 6908     | 69    |
| H(6A)  | 1188      | 12093    | 5889     | 69    |
| H(7A)  | 2168      | 11712    | 4699     | 58    |
| H(11A) | 4395      | 8809     | 3357     | 76    |
| H(11B) | 4496      | 9680     | 3100     | 76    |
| H(11C) | 2770      | 9225     | 2781     | 76    |
| H(15A) | 5289      | 5053     | 6730     | 53    |
| H(16A) | 5966      | 3749     | 6906     | 60    |
| H(17A) | 4469      | 2864     | 5903     | 73    |
| H(18A) | 2357      | 3258     | 4726     | 61    |
| H(22A) | -990      | 6170     | 3368     | 69    |
| H(22B) | -1273     | 5308     | 3057     | 69    |
| H(22C) | 125       | 5810     | 2771     | 69    |

**Table S17.** Torsion angles [°] for **1B**

---

|                       |           |
|-----------------------|-----------|
| Mn-O(1)-C(1)-C(10)    | 177.6(5)  |
| Mn-O(1)-C(1)-C(2)     | -0.8(7)   |
| Mn-O(2)-C(2)-C(3)     | 175.7(5)  |
| Mn-O(2)-C(2)-C(1)     | 0.1(8)    |
| O(1)-C(1)-C(2)-O(2)   | 0.5(9)    |
| C(10)-C(1)-C(2)-O(2)  | -178.0(6) |
| O(1)-C(1)-C(2)-C(3)   | -175.3(6) |
| C(10)-C(1)-C(2)-C(3)  | 6.2(10)   |
| O(2)-C(2)-C(3)-C(4)   | -1.0(10)  |
| C(1)-C(2)-C(3)-C(4)   | 174.6(6)  |
| O(2)-C(2)-C(3)-C(8)   | 178.8(6)  |
| C(1)-C(2)-C(3)-C(8)   | -5.6(9)   |
| C(8)-C(3)-C(4)-C(5)   | 2.7(11)   |
| C(2)-C(3)-C(4)-C(5)   | -177.5(6) |
| C(3)-C(4)-C(5)-C(6)   | -2.9(11)  |
| C(4)-C(5)-C(6)-C(7)   | 2.3(12)   |
| C(5)-C(6)-C(7)-C(8)   | -1.6(12)  |
| C(6)-C(7)-C(8)-C(3)   | 1.2(10)   |
| C(6)-C(7)-C(8)-C(9)   | 180.0(7)  |
| C(4)-C(3)-C(8)-C(7)   | -1.8(10)  |
| C(2)-C(3)-C(8)-C(7)   | 178.4(6)  |
| C(4)-C(3)-C(8)-C(9)   | 179.4(7)  |
| C(2)-C(3)-C(8)-C(9)   | -0.4(10)  |
| C(7)-C(8)-C(9)-O(3)   | 7.3(11)   |
| C(3)-C(8)-C(9)-O(3)   | -174.0(6) |
| C(7)-C(8)-C(9)-C(10)  | -172.7(6) |
| C(3)-C(8)-C(9)-C(10)  | 6.1(10)   |
| O(1)-C(1)-C(10)-C(9)  | -178.9(6) |
| C(2)-C(1)-C(10)-C(9)  | -0.6(10)  |
| O(1)-C(1)-C(10)-C(11) | 1.0(11)   |
| C(2)-C(1)-C(10)-C(11) | 179.3(6)  |
| O(3)-C(9)-C(10)-C(1)  | 174.5(6)  |
| C(8)-C(9)-C(10)-C(1)  | -5.5(10)  |
| O(3)-C(9)-C(10)-C(11) | -5.4(10)  |
| C(8)-C(9)-C(10)-C(11) | 174.6(6)  |



|                         |           |
|-------------------------|-----------|
| Mn-O(4)-C(12)-C(21)     | 176.4(6)  |
| Mn-O(4)-C(12)-C(13)     | -3.8(8)   |
| Mn-O(5)-C(13)-C(14)     | -176.5(5) |
| Mn-O(5)-C(13)-C(12)     | 2.5(8)    |
| O(4)-C(12)-C(13)-O(5)   | 0.6(9)    |
| C(21)-C(12)-C(13)-O(5)  | -179.5(6) |
| O(4)-C(12)-C(13)-C(14)  | 179.6(6)  |
| C(21)-C(12)-C(13)-C(14) | -0.6(10)  |
| O(5)-C(13)-C(14)-C(19)  | 177.8(7)  |
| C(12)-C(13)-C(14)-C(19) | -1.1(10)  |
| O(5)-C(13)-C(14)-C(15)  | -2.7(10)  |
| C(12)-C(13)-C(14)-C(15) | 178.4(7)  |
| C(19)-C(14)-C(15)-C(16) | 2.7(11)   |
| C(13)-C(14)-C(15)-C(16) | -176.7(7) |
| C(14)-C(15)-C(16)-C(17) | -1.4(11)  |
| C(15)-C(16)-C(17)-C(18) | 0.2(13)   |
| C(16)-C(17)-C(18)-C(19) | -0.3(13)  |
| C(15)-C(14)-C(19)-C(18) | -2.9(11)  |
| C(13)-C(14)-C(19)-C(18) | 176.5(6)  |
| C(15)-C(14)-C(19)-C(20) | -177.3(6) |
| C(13)-C(14)-C(19)-C(20) | 2.2(10)   |
| C(17)-C(18)-C(19)-C(14) | 1.7(12)   |
| C(17)-C(18)-C(19)-C(20) | 176.2(8)  |
| C(14)-C(19)-C(20)-O(6)  | -178.7(7) |
| C(18)-C(19)-C(20)-O(6)  | 6.9(11)   |
| C(14)-C(19)-C(20)-C(21) | -1.7(10)  |
| C(18)-C(19)-C(20)-C(21) | -176.1(7) |
| O(4)-C(12)-C(21)-C(20)  | -179.1(7) |
| C(13)-C(12)-C(21)-C(20) | 1.1(10)   |
| O(4)-C(12)-C(21)-C(22)  | 1.6(11)   |
| C(13)-C(12)-C(21)-C(22) | -178.2(6) |
| O(6)-C(20)-C(21)-C(12)  | 177.0(7)  |
| C(19)-C(20)-C(21)-C(12) | 0.0(10)   |
| O(6)-C(20)-C(21)-C(22)  | -3.8(11)  |
| C(19)-C(20)-C(21)-C(22) | 179.2(6)  |

---

Symmetry transformations used to generate equivalent atoms:

**Table S18.** Hydrogen bonds for **1B** [ $\text{\AA}$  and  $^\circ$ ]

| D-H...A               | d(D-H)  | d(H...A) | d(D...A) | $\angle(\text{DHA})$ |
|-----------------------|---------|----------|----------|----------------------|
| O(1M)-H(1M)...O(3)#1  | 0.82(2) | 1.93(4)  | 2.689(6) | 153(7)               |
| O(1W)-H(1W1)...O(2W)  | 0.84(2) | 1.79(3)  | 2.609(7) | 167(8)               |
| O(1W)-H(1W2)...O(6)#2 | 0.80(2) | 2.02(5)  | 2.728(6) | 147(8)               |
| O(2W)-H(2W1)...O(1)#3 | 0.83(2) | 2.00(4)  | 2.773(7) | 155(9)               |
| O(2W)-H(2W2)...O(4)#3 | 0.82(2) | 2.08(6)  | 2.733(7) | 136(7)               |

Symmetry transformations used to generate equivalent atoms:

#1  $-x+1, -y+2, -z+1$  #2  $-x, -y+1, -z+1$  #3  $x, -y+3/2, z+1/2$

**Table S19.** Crystal data and structure refinement for **1A**

|                                   |                                                   |                |
|-----------------------------------|---------------------------------------------------|----------------|
| Identification code               | shelx                                             |                |
| Empirical formula                 | C <sub>22</sub> H <sub>18</sub> Mn O <sub>8</sub> |                |
| Formula weight                    | 465.30                                            |                |
| Temperature                       | 298(2) K                                          |                |
| Wavelength                        | 0.71073 Å                                         |                |
| Crystal system                    | Monoclinic                                        |                |
| Space group                       | <i>P</i> 2 <sub>1</sub> / <i>c</i>                |                |
| Unit cell dimensions              | a = 5.0191(13) Å                                  | α = 90°        |
|                                   | b = 12.438(4) Å                                   | β = 98.678(7)° |
|                                   | c = 15.964(4) Å                                   | γ = 90°        |
| Volume                            | 985.2(5) Å <sup>3</sup>                           |                |
| Z                                 | 2                                                 |                |
| Density (calculated)              | 1.568 Mg/m <sup>3</sup>                           |                |
| Absorption coefficient            | 0.719 mm <sup>-1</sup>                            |                |
| F(000)                            | 478                                               |                |
| Crystal size                      | 0.23 x 0.16 x 0.13 mm <sup>3</sup>                |                |
| Theta range for data collection   | 3.057 to 27.103°                                  |                |
| Index ranges                      | -6 ≤ h ≤ 6, -15 ≤ k ≤ 15, -20 ≤ l ≤ 20            |                |
| Reflections collected             | 9796                                              |                |
| Independent reflections           | 2177 [R(int) = 0.0533]                            |                |
| Completeness to theta = 25.242°   | 99.8 %                                            |                |
| Absorption correction             | None                                              |                |
| Refinement method                 | Full-matrix least-squares on F <sup>2</sup>       |                |
| Data / restraints / parameters    | 2177 / 3 / 151                                    |                |
| Goodness-of-fit on F <sup>2</sup> | 1.042                                             |                |
| Final R indices [I > 2σ(I)]       | R1 = 0.0460, wR2 = 0.0823                         |                |
| R indices (all data)              | R1 = 0.0874, wR2 = 0.0936                         |                |
| Extinction coefficient            | n/a                                               |                |
| Largest diff. peak and hole       | 0.436 and -0.262 e.Å <sup>-3</sup>                |                |

**Table S20.** Atomic coordinates ( $\times 10^4$ ) and equivalent isotropic displacement parameters ( $\text{\AA}^2 \times 10^3$ ) for **1A**.  $U(\text{eq})$  is defined as one third of the trace of the orthogonalized  $U_{ij}$  tensor

|       | x        | y       | z       | U(eq) |
|-------|----------|---------|---------|-------|
| Mn(1) | 5000     | 5000    | 5000    | 27(1) |
| O(1)  | 4357(4)  | 4937(2) | 6335(1) | 37(1) |
| O(2)  | 7693(4)  | 3792(2) | 5558(1) | 34(1) |
| O(1W) | 8059(4)  | 6195(2) | 5293(1) | 42(1) |
| O(3)  | 10123(4) | 1853(2) | 8071(1) | 51(1) |
| C(1)  | 5705(5)  | 4245(2) | 6760(2) | 29(1) |
| C(2)  | 7606(5)  | 3562(2) | 6344(2) | 27(1) |
| C(3)  | 9042(5)  | 2761(2) | 6791(2) | 31(1) |
| C(4)  | 8791(6)  | 2570(2) | 7667(2) | 34(1) |
| C(5)  | 6895(5)  | 3238(2) | 8088(2) | 33(1) |
| C(6)  | 6532(6)  | 3030(3) | 8918(2) | 46(1) |
| C(7)  | 4782(7)  | 3636(3) | 9300(2) | 51(1) |
| C(8)  | 3345(7)  | 4458(3) | 8865(2) | 51(1) |
| C(9)  | 3650(6)  | 4669(2) | 8035(2) | 40(1) |
| C(10) | 5423(5)  | 4060(2) | 7648(2) | 31(1) |
| C(11) | 10915(6) | 2067(2) | 6381(2) | 42(1) |

**Table S21.** Bond lengths [ $\text{\AA}$ ] and angles [ $^\circ$ ] for **1A**

---

|                      |            |
|----------------------|------------|
| Mn(1)-O(2)           | 2.1250(18) |
| Mn(1)-O(2)#1         | 2.1250(18) |
| Mn(1)-O(1W)#1        | 2.137(2)   |
| Mn(1)-O(1W)          | 2.137(2)   |
| Mn(1)-O(1)           | 2.2049(17) |
| Mn(1)-O(1)#1         | 2.2050(17) |
| O(1)-C(1)            | 1.233(3)   |
| O(2)-C(2)            | 1.293(3)   |
| O(1W)-H(1W1)         | 0.829(17)  |
| O(1W)-H(1W2)         | 0.815(17)  |
| O(3)-C(4)            | 1.236(3)   |
| C(1)-C(10)           | 1.463(3)   |
| C(1)-C(2)            | 1.506(4)   |
| C(2)-C(3)            | 1.366(4)   |
| C(3)-C(4)            | 1.442(3)   |
| C(3)-C(11)           | 1.498(4)   |
| C(4)-C(5)            | 1.497(4)   |
| C(5)-C(6)            | 1.388(3)   |
| C(5)-C(10)           | 1.389(4)   |
| C(6)-C(7)            | 1.368(4)   |
| C(6)-H(6A)           | 0.9300     |
| C(7)-C(8)            | 1.377(4)   |
| C(7)-H(7A)           | 0.9300     |
| C(8)-C(9)            | 1.382(4)   |
| C(8)-H(8A)           | 0.9300     |
| C(9)-C(10)           | 1.384(4)   |
| C(9)-H(9A)           | 0.9300     |
| C(11)-H(11A)         | 0.9600     |
| C(11)-H(11B)         | 0.9600     |
| C(11)-H(11C)         | 0.9600     |
| O(2)-Mn(1)-O(2)#1    | 180.0      |
| O(2)-Mn(1)-O(1W)#1   | 89.44(8)   |
| O(2)#1-Mn(1)-O(1W)#1 | 90.56(8)   |
| O(2)-Mn(1)-O(1W)     | 90.56(8)   |

|                      |            |
|----------------------|------------|
| O(2)#1-Mn(1)-O(1W)   | 89.44(8)   |
| O(1W)#1-Mn(1)-O(1W)  | 180.0      |
| O(2)-Mn(1)-O(1)      | 75.28(7)   |
| O(2)#1-Mn(1)-O(1)    | 104.72(7)  |
| O(1W)#1-Mn(1)-O(1)   | 88.93(8)   |
| O(1W)-Mn(1)-O(1)     | 91.07(8)   |
| O(2)-Mn(1)-O(1)#1    | 104.72(7)  |
| O(2)#1-Mn(1)-O(1)#1  | 75.28(7)   |
| O(1W)#1-Mn(1)-O(1)#1 | 91.07(8)   |
| O(1W)-Mn(1)-O(1)#1   | 88.93(8)   |
| O(1)-Mn(1)-O(1)#1    | 180.0      |
| C(1)-O(1)-Mn(1)      | 114.12(16) |
| C(2)-O(2)-Mn(1)      | 116.80(16) |
| Mn(1)-O(1W)-H(1W1)   | 122(2)     |
| Mn(1)-O(1W)-H(1W2)   | 122(2)     |
| H(1W1)-O(1W)-H(1W2)  | 106(2)     |
| O(1)-C(1)-C(10)      | 121.2(2)   |
| O(1)-C(1)-C(2)       | 118.9(2)   |
| C(10)-C(1)-C(2)      | 119.9(2)   |
| O(2)-C(2)-C(3)       | 125.2(2)   |
| O(2)-C(2)-C(1)       | 114.8(2)   |
| C(3)-C(2)-C(1)       | 120.0(2)   |
| C(2)-C(3)-C(4)       | 120.7(2)   |
| C(2)-C(3)-C(11)      | 120.5(2)   |
| C(4)-C(3)-C(11)      | 118.8(2)   |
| O(3)-C(4)-C(3)       | 120.3(3)   |
| O(3)-C(4)-C(5)       | 119.7(2)   |
| C(3)-C(4)-C(5)       | 119.9(2)   |
| C(6)-C(5)-C(10)      | 118.9(3)   |
| C(6)-C(5)-C(4)       | 120.6(3)   |
| C(10)-C(5)-C(4)      | 120.4(2)   |
| C(7)-C(6)-C(5)       | 120.5(3)   |
| C(7)-C(6)-H(6A)      | 119.7      |
| C(5)-C(6)-H(6A)      | 119.7      |
| C(6)-C(7)-C(8)       | 120.5(3)   |
| C(6)-C(7)-H(7A)      | 119.8      |
| C(8)-C(7)-H(7A)      | 119.8      |

|                     |          |
|---------------------|----------|
| C(7)-C(8)-C(9)      | 119.9(3) |
| C(7)-C(8)-H(8A)     | 120.0    |
| C(9)-C(8)-H(8A)     | 120.0    |
| C(8)-C(9)-C(10)     | 119.8(3) |
| C(8)-C(9)-H(9A)     | 120.1    |
| C(10)-C(9)-H(9A)    | 120.1    |
| C(9)-C(10)-C(5)     | 120.4(2) |
| C(9)-C(10)-C(1)     | 120.6(2) |
| C(5)-C(10)-C(1)     | 119.0(2) |
| C(3)-C(11)-H(11A)   | 109.5    |
| C(3)-C(11)-H(11B)   | 109.5    |
| H(11A)-C(11)-H(11B) | 109.5    |
| C(3)-C(11)-H(11C)   | 109.5    |
| H(11A)-C(11)-H(11C) | 109.5    |
| H(11B)-C(11)-H(11C) | 109.5    |

---

Symmetry transformations used to generate equivalent atoms:

#1 -x+1,-y+1,-z+1

**Table S22.** Anisotropic displacement parameters ( $\text{\AA}^2 \times 10^3$ ) for **1A**. The anisotropic displacement factor exponent takes the form:  $-2\pi^2 [h^2 a^{*2} U^{11} + \dots + 2 h k a^* b^* U^{12}]$

|       | U11   | U22   | U33   | U23    | U13   | U12    |
|-------|-------|-------|-------|--------|-------|--------|
| Mn(1) | 28(1) | 35(1) | 17(1) | 7(1)   | 1(1)  | -2(1)  |
| O(1)  | 42(1) | 43(1) | 27(1) | 7(1)   | 7(1)  | 9(1)   |
| O(2)  | 35(1) | 45(1) | 22(1) | 4(1)   | 7(1)  | 3(1)   |
| O(1W) | 40(1) | 57(2) | 31(1) | -10(1) | 8(1)  | -14(1) |
| O(3)  | 61(2) | 54(1) | 37(1) | 16(1)  | 6(1)  | 20(1)  |
| C(1)  | 28(2) | 32(2) | 25(1) | 2(1)   | 0(1)  | -4(1)  |
| C(2)  | 26(1) | 34(2) | 22(1) | -1(1)  | 3(1)  | -6(1)  |
| C(3)  | 30(2) | 33(2) | 31(1) | 1(1)   | 5(1)  | -4(1)  |
| C(4)  | 33(2) | 38(2) | 28(1) | 4(1)   | -1(1) | 1(1)   |
| C(5)  | 32(2) | 40(2) | 26(1) | 4(1)   | 3(1)  | -4(1)  |
| C(6)  | 53(2) | 55(2) | 30(2) | 14(1)  | 8(2)  | 10(2)  |
| C(7)  | 66(2) | 65(2) | 28(2) | 8(2)   | 18(2) | 4(2)   |
| C(8)  | 64(2) | 55(2) | 39(2) | -1(2)  | 21(2) | 9(2)   |
| C(9)  | 51(2) | 39(2) | 32(1) | 6(1)   | 9(1)  | 5(1)   |
| C(10) | 33(2) | 36(2) | 24(1) | 0(1)   | 6(1)  | -2(1)  |
| C(11) | 44(2) | 43(2) | 40(2) | 3(1)   | 11(1) | 6(2)   |



**Table S23.** Hydrogen coordinates ( $\times 10^4$ ) and isotropic displacement parameters ( $\text{\AA}^2 \times 10^3$ ) for **1A**

|        | x        | y        | z        | U(eq)  |
|--------|----------|----------|----------|--------|
| H(6A)  | 7487     | 2475     | 9217     | 55     |
| H(7A)  | 4563     | 3491     | 9857     | 62     |
| H(8A)  | 2169     | 4870     | 9130     | 62     |
| H(9A)  | 2667     | 5219     | 7738     | 48     |
| H(11A) | 10030    | 1837     | 5836     | 63     |
| H(11B) | 11415    | 1450     | 6731     | 63     |
| H(11C) | 12501    | 2470     | 6315     | 63     |
| H(1W1) | 9340(50) | 6250(30) | 5024(16) | 83(14) |
| H(1W2) | 8640(60) | 6370(20) | 5778(11) | 55(11) |

**Table S24.** Torsion angles [°] for **1A**

---

|                       |             |
|-----------------------|-------------|
| Mn(1)-O(1)-C(1)-C(10) | -176.96(19) |
| Mn(1)-O(1)-C(1)-C(2)  | 1.2(3)      |
| Mn(1)-O(2)-C(2)-C(3)  | 175.3(2)    |
| Mn(1)-O(2)-C(2)-C(1)  | -3.7(3)     |
| O(1)-C(1)-C(2)-O(2)   | 1.7(4)      |
| C(10)-C(1)-C(2)-O(2)  | 179.8(2)    |
| O(1)-C(1)-C(2)-C(3)   | -177.4(2)   |
| C(10)-C(1)-C(2)-C(3)  | 0.8(4)      |
| O(2)-C(2)-C(3)-C(4)   | -179.8(2)   |
| C(1)-C(2)-C(3)-C(4)   | -0.9(4)     |
| O(2)-C(2)-C(3)-C(11)  | 0.4(4)      |
| C(1)-C(2)-C(3)-C(11)  | 179.3(2)    |
| C(2)-C(3)-C(4)-O(3)   | -179.1(3)   |
| C(11)-C(3)-C(4)-O(3)  | 0.7(4)      |
| C(2)-C(3)-C(4)-C(5)   | 1.3(4)      |
| C(11)-C(3)-C(4)-C(5)  | -178.9(2)   |
| O(3)-C(4)-C(5)-C(6)   | -2.7(4)     |
| C(3)-C(4)-C(5)-C(6)   | 176.9(3)    |
| O(3)-C(4)-C(5)-C(10)  | 178.8(3)    |
| C(3)-C(4)-C(5)-C(10)  | -1.6(4)     |
| C(10)-C(5)-C(6)-C(7)  | -1.0(5)     |
| C(4)-C(5)-C(6)-C(7)   | -179.5(3)   |
| C(5)-C(6)-C(7)-C(8)   | 0.3(5)      |
| C(6)-C(7)-C(8)-C(9)   | 0.5(5)      |
| C(7)-C(8)-C(9)-C(10)  | -0.7(5)     |
| C(8)-C(9)-C(10)-C(5)  | 0.0(5)      |
| C(8)-C(9)-C(10)-C(1)  | 177.8(3)    |
| C(6)-C(5)-C(10)-C(9)  | 0.8(4)      |
| C(4)-C(5)-C(10)-C(9)  | 179.3(3)    |
| C(6)-C(5)-C(10)-C(1)  | -177.0(3)   |
| C(4)-C(5)-C(10)-C(1)  | 1.5(4)      |
| O(1)-C(1)-C(10)-C(9)  | -0.8(4)     |
| C(2)-C(1)-C(10)-C(9)  | -178.9(2)   |
| O(1)-C(1)-C(10)-C(5)  | 177.0(2)    |
| C(2)-C(1)-C(10)-C(5)  | -1.1(4)     |

---

Symmetry transformations used to generate equivalent atoms:

#1  $-x+1,-y+1,-z+1$

**Table S25.** Hydrogen bonds for **1A** [ $\text{\AA}$  and  $^\circ$ ]

| D-H...A                | d(D-H)    | d(H...A)  | d(D...A) | $\angle(\text{DHA})$ |
|------------------------|-----------|-----------|----------|----------------------|
| O(1W)-H(1W1)...O(2)#20 | 0.829(17) | 1.870(18) | 2.695(3) | 174(4)               |
| O(1W)-H(1W2)...O(3)#30 | 0.815(17) | 1.945(17) | 2.759(3) | 176(3)               |

Symmetry transformations used to generate equivalent atoms:

#1  $-x+1, -y+1, -z+1$  #2  $-x+2, -y+1, -z+1$  #3  $-x+2, y+1/2, -z+3/2$

**Table S26.** Crystal data and structure refinement for **3**

|                                   |                                                                 |                 |
|-----------------------------------|-----------------------------------------------------------------|-----------------|
| Identification code               | shelx                                                           |                 |
| Empirical formula                 | C <sub>48</sub> H <sub>56</sub> Ni <sub>4</sub> O <sub>24</sub> |                 |
| Formula weight                    | 1251.76                                                         |                 |
| Temperature                       | 296(2) K                                                        |                 |
| Wavelength                        | 0.71073 Å                                                       |                 |
| Crystal system                    | Monoclinic                                                      |                 |
| Space group                       | I 2/a                                                           |                 |
| Unit cell dimensions              | a = 19.133(3) Å                                                 | α = 90°         |
|                                   | b = 12.8402(19) Å                                               | β = 94.062(11)° |
|                                   | c = 21.624(3) Å                                                 | γ = 90°         |
| Volume                            | 5299.1(14) Å <sup>3</sup>                                       |                 |
| Z                                 | 4                                                               |                 |
| Density (calculated)              | 1.569 Mg/m <sup>3</sup>                                         |                 |
| Absorption coefficient            | 1.483 mm <sup>-1</sup>                                          |                 |
| F(000)                            | 2592                                                            |                 |
| Crystal size                      | 0.38 x 0.36 x 0.09 mm <sup>3</sup>                              |                 |
| Theta range for data collection   | 2.634 to 25.497°.                                               |                 |
| Index ranges                      | -23 ≤ h ≤ 21, -15 ≤ k ≤ 15, -26 ≤ l ≤ 26                        |                 |
| Reflections collected             | 50722                                                           |                 |
| Independent reflections           | 4936 [R(int) = 0.2230]                                          |                 |
| Completeness to theta = 25.242°   | 99.9 %                                                          |                 |
| Absorption correction             | Semi-empirical from equivalents                                 |                 |
| Max. and min. transmission        | 0.8818 and 0.6062                                               |                 |
| Refinement method                 | Full-matrix least-squares on F <sup>2</sup>                     |                 |
| Data / restraints / parameters    | 4936 / 14 / 371                                                 |                 |
| Goodness-of-fit on F <sup>2</sup> | 1.109                                                           |                 |
| Final R indices [I > 2σ(I)]       | R1 = 0.0991, wR2 = 0.1951                                       |                 |
| R indices (all data)              | R1 = 0.1882, wR2 = 0.2334                                       |                 |
| Extinction coefficient            | n/a                                                             |                 |
| Largest diff. peak and hole       | 0.902 and -0.929 e.Å <sup>-3</sup>                              |                 |

**Table S27.** Atomic coordinates ( $\times 10^4$ ) and equivalent isotropic displacement parameters ( $\text{\AA}^2 \times 10^3$ ) for **3**.  $U(\text{eq})$  is defined as one third of the trace of the orthogonalized  $U_{ij}$  tensor

|       | x        | y        | z       | U(eq) |
|-------|----------|----------|---------|-------|
| Ni(1) | 7356(1)  | 4846(1)  | 5714(1) | 28(1) |
| Ni(2) | 8301(1)  | 3231(1)  | 5176(1) | 28(1) |
| O(1)  | 8031(3)  | 4881(5)  | 6486(3) | 33(2) |
| O(2)  | 7359(4)  | 6447(5)  | 5934(3) | 39(2) |
| O(3)  | 9252(4)  | 7270(6)  | 7814(4) | 60(2) |
| O(4)  | 9123(3)  | 3033(5)  | 4642(3) | 36(2) |
| O(5)  | 8391(4)  | 1644(5)  | 5219(3) | 38(2) |
| O(6)  | 10253(4) | 262(6)   | 3700(4) | 57(2) |
| O(7)  | 8189(3)  | 4819(4)  | 5145(3) | 22(2) |
| O(8)  | 7395(3)  | 3278(4)  | 5614(3) | 22(2) |
| O(1W) | 6419(3)  | 4658(5)  | 6163(3) | 39(2) |
| O(2W) | 8920(4)  | 3384(5)  | 6035(3) | 34(2) |
| C(1)  | 8175(5)  | 5778(7)  | 6711(5) | 29(2) |
| C(2)  | 7757(6)  | 6628(8)  | 6406(5) | 33(3) |
| C(3)  | 7827(5)  | 7719(7)  | 6659(5) | 30(2) |
| C(4)  | 7394(6)  | 8493(8)  | 6414(5) | 42(3) |
| C(5)  | 7469(7)  | 9504(9)  | 6641(6) | 57(4) |
| C(6)  | 7973(8)  | 9706(9)  | 7106(6) | 62(4) |
| C(7)  | 8404(7)  | 8945(9)  | 7351(6) | 54(3) |
| C(8)  | 8330(6)  | 7911(8)  | 7138(5) | 36(3) |
| C(9)  | 8784(6)  | 7079(9)  | 7392(5) | 46(3) |
| C(10) | 8680(6)  | 5997(8)  | 7174(5) | 35(3) |
| C(11) | 9136(7)  | 5150(10) | 7461(6) | 71(4) |
| C(12) | 9228(5)  | 2057(7)  | 4523(5) | 27(2) |
| C(13) | 8815(5)  | 1294(8)  | 4872(5) | 30(2) |
| C(14) | 8904(6)  | 169(8)   | 4798(5) | 37(3) |
| C(15) | 8528(6)  | -512(8)  | 5140(5) | 36(3) |
| C(16) | 8636(7)  | -1590(9) | 5064(5) | 51(3) |
| C(17) | 9124(7)  | -1911(9) | 4662(6) | 53(3) |
| C(18) | 9486(7)  | -1231(9) | 4330(5) | 51(3) |
| C(19) | 9396(6)  | -164(8)  | 4394(5) | 40(3) |
| C(20) | 9811(6)  | 588(9)   | 4032(5) | 39(3) |

|       |          |          |         |       |
|-------|----------|----------|---------|-------|
| C(21) | 9678(5)  | 1697(8)  | 4097(5) | 36(3) |
| C(22) | 10062(6) | 2430(9)  | 3710(6) | 60(4) |
| C(23) | 8789(6)  | 5431(9)  | 5253(5) | 49(3) |
| C(24) | 7343(6)  | 2633(9)  | 6144(5) | 49(3) |
| O(3W) | 9573(5)  | 8848(7)  | 8717(5) | 66(3) |
| O(4W) | 10738(5) | -1699(7) | 3202(5) | 67(3) |

---

**Table S28.** Bond lengths [ $\text{\AA}$ ] and angles [ $^\circ$ ] for **3**

---

|              |           |
|--------------|-----------|
| Ni(1)-O(8)   | 2.027(6)  |
| Ni(1)-O(1)   | 2.037(6)  |
| Ni(1)-O(7)#1 | 2.065(6)  |
| Ni(1)-O(7)   | 2.082(6)  |
| Ni(1)-O(2)   | 2.110(7)  |
| Ni(1)-O(1W)  | 2.111(6)  |
| Ni(2)-O(4)   | 2.031(7)  |
| Ni(2)-O(8)   | 2.035(6)  |
| Ni(2)-O(5)   | 2.046(7)  |
| Ni(2)-O(7)   | 2.051(6)  |
| Ni(2)-O(8)#1 | 2.092(6)  |
| Ni(2)-O(2W)  | 2.140(7)  |
| O(1)-C(1)    | 1.273(11) |
| O(2)-C(2)    | 1.252(11) |
| O(3)-C(9)    | 1.255(13) |
| O(4)-C(12)   | 1.299(11) |
| O(5)-C(13)   | 1.228(11) |
| O(6)-C(20)   | 1.222(12) |
| O(7)-C(23)   | 1.397(12) |
| O(8)-C(24)   | 1.423(12) |
| C(1)-C(10)   | 1.371(13) |
| C(1)-C(2)    | 1.480(14) |
| C(2)-C(3)    | 1.506(13) |
| C(3)-C(4)    | 1.377(14) |
| C(3)-C(8)    | 1.386(14) |
| C(4)-C(5)    | 1.393(15) |
| C(5)-C(6)    | 1.368(17) |
| C(6)-C(7)    | 1.362(17) |
| C(7)-C(8)    | 1.409(15) |
| C(8)-C(9)    | 1.459(15) |
| C(9)-C(10)   | 1.476(15) |
| C(10)-C(11)  | 1.500(15) |
| C(12)-C(21)  | 1.384(14) |
| C(12)-C(13)  | 1.496(14) |
| C(13)-C(14)  | 1.465(14) |



|             |           |
|-------------|-----------|
| C(14)-C(15) | 1.380(14) |
| C(14)-C(19) | 1.396(15) |
| C(15)-C(16) | 1.411(14) |
| C(16)-C(17) | 1.383(16) |
| C(17)-C(18) | 1.351(16) |
| C(18)-C(19) | 1.389(15) |
| C(19)-C(20) | 1.505(16) |
| C(20)-C(21) | 1.455(15) |
| C(21)-C(22) | 1.488(15) |

|                    |          |
|--------------------|----------|
| O(8)-Ni(1)-O(1)    | 94.8(2)  |
| O(8)-Ni(1)-O(7)#1  | 84.7(2)  |
| O(1)-Ni(1)-O(7)#1  | 171.0(3) |
| O(8)-Ni(1)-O(7)    | 83.4(2)  |
| O(1)-Ni(1)-O(7)    | 91.0(3)  |
| O(7)#1-Ni(1)-O(7)  | 80.0(2)  |
| O(8)-Ni(1)-O(2)    | 172.9(3) |
| O(1)-Ni(1)-O(2)    | 78.6(3)  |
| O(7)#1-Ni(1)-O(2)  | 102.3(2) |
| O(7)-Ni(1)-O(2)    | 99.2(3)  |
| O(8)-Ni(1)-O(1W)   | 88.5(3)  |
| O(1)-Ni(1)-O(1W)   | 97.8(3)  |
| O(7)#1-Ni(1)-O(1W) | 91.2(3)  |
| O(7)-Ni(1)-O(1W)   | 168.5(2) |
| O(2)-Ni(1)-O(1W)   | 89.8(3)  |
| O(4)-Ni(2)-O(8)    | 171.0(3) |
| O(4)-Ni(2)-O(5)    | 80.5(3)  |
| O(8)-Ni(2)-O(5)    | 94.6(3)  |
| O(4)-Ni(2)-O(7)    | 100.9(3) |
| O(8)-Ni(2)-O(7)    | 84.0(2)  |
| O(5)-Ni(2)-O(7)    | 178.6(3) |
| O(4)-Ni(2)-O(8)#1  | 90.7(3)  |
| O(8)-Ni(2)-O(8)#1  | 82.3(2)  |
| O(5)-Ni(2)-O(8)#1  | 96.4(3)  |
| O(7)-Ni(2)-O(8)#1  | 83.4(2)  |
| O(4)-Ni(2)-O(2W)   | 95.8(3)  |
| O(8)-Ni(2)-O(2W)   | 91.7(3)  |

|                    |           |
|--------------------|-----------|
| O(5)-Ni(2)-O(2W)   | 90.7(3)   |
| O(7)-Ni(2)-O(2W)   | 89.3(2)   |
| O(8)#1-Ni(2)-O(2W) | 171.0(2)  |
| C(1)-O(1)-Ni(1)    | 116.1(6)  |
| C(2)-O(2)-Ni(1)    | 110.9(6)  |
| C(12)-O(4)-Ni(2)   | 111.8(6)  |
| C(13)-O(5)-Ni(2)   | 113.2(6)  |
| C(23)-O(7)-Ni(2)   | 118.1(6)  |
| C(23)-O(7)-Ni(1)#1 | 119.8(6)  |
| Ni(2)-O(7)-Ni(1)#1 | 95.2(2)   |
| C(23)-O(7)-Ni(1)   | 123.1(6)  |
| Ni(2)-O(7)-Ni(1)   | 94.6(2)   |
| Ni(1)#1-O(7)-Ni(1) | 99.9(2)   |
| C(24)-O(8)-Ni(1)   | 119.2(6)  |
| C(24)-O(8)-Ni(2)   | 117.9(6)  |
| Ni(1)-O(8)-Ni(2)   | 96.8(2)   |
| C(24)-O(8)-Ni(2)#1 | 124.3(6)  |
| Ni(1)-O(8)-Ni(2)#1 | 95.2(2)   |
| Ni(2)-O(8)-Ni(2)#1 | 97.6(2)   |
| O(1)-C(1)-C(10)    | 125.9(9)  |
| O(1)-C(1)-C(2)     | 113.7(8)  |
| C(10)-C(1)-C(2)    | 120.4(9)  |
| O(2)-C(2)-C(1)     | 120.3(9)  |
| O(2)-C(2)-C(3)     | 120.2(9)  |
| C(1)-C(2)-C(3)     | 119.5(9)  |
| C(4)-C(3)-C(8)     | 121.8(9)  |
| C(4)-C(3)-C(2)     | 119.7(9)  |
| C(8)-C(3)-C(2)     | 118.5(9)  |
| C(3)-C(4)-C(5)     | 119.5(11) |
| C(6)-C(5)-C(4)     | 119.1(11) |
| C(7)-C(6)-C(5)     | 121.7(11) |
| C(6)-C(7)-C(8)     | 120.3(11) |
| C(3)-C(8)-C(7)     | 117.4(10) |
| C(3)-C(8)-C(9)     | 120.9(9)  |
| C(7)-C(8)-C(9)     | 121.6(10) |
| O(3)-C(9)-C(8)     | 120.3(10) |
| O(3)-C(9)-C(10)    | 119.2(11) |

|                   |           |
|-------------------|-----------|
| C(8)-C(9)-C(10)   | 120.4(10) |
| C(1)-C(10)-C(9)   | 119.8(10) |
| C(1)-C(10)-C(11)  | 120.8(10) |
| C(9)-C(10)-C(11)  | 119.3(10) |
| O(4)-C(12)-C(21)  | 124.6(9)  |
| O(4)-C(12)-C(13)  | 115.9(9)  |
| C(21)-C(12)-C(13) | 119.5(9)  |
| O(5)-C(13)-C(14)  | 120.9(10) |
| O(5)-C(13)-C(12)  | 117.7(9)  |
| C(14)-C(13)-C(12) | 121.4(9)  |
| C(15)-C(14)-C(19) | 122.8(10) |
| C(15)-C(14)-C(13) | 119.8(10) |
| C(19)-C(14)-C(13) | 117.3(10) |
| C(14)-C(15)-C(16) | 118.2(10) |
| C(17)-C(16)-C(15) | 118.4(11) |
| C(18)-C(17)-C(16) | 122.4(11) |
| C(17)-C(18)-C(19) | 120.8(12) |
| C(18)-C(19)-C(14) | 117.3(11) |
| C(18)-C(19)-C(20) | 120.5(11) |
| C(14)-C(19)-C(20) | 122.2(10) |
| O(6)-C(20)-C(21)  | 121.7(11) |
| O(6)-C(20)-C(19)  | 119.9(10) |
| C(21)-C(20)-C(19) | 118.4(10) |
| C(12)-C(21)-C(20) | 120.8(10) |
| C(12)-C(21)-C(22) | 121.2(10) |
| C(20)-C(21)-C(22) | 117.9(10) |

---

Symmetry transformations used to generate equivalent atoms:

#1  $-x+3/2, y, -z+1$

**Table S29.** Anisotropic displacement parameters ( $\text{\AA}^2 \times 10^3$ ) for **3**. The anisotropic displacement factor exponent takes the form:  $-2\pi^2 [h^2 a^{*2} U^{11} + \dots + 2 h k a^* b^* U^{12}]$

|       | U <sup>11</sup> | U <sup>22</sup> | U <sup>33</sup> | U <sup>23</sup> | U <sup>13</sup> | U <sup>12</sup> |
|-------|-----------------|-----------------|-----------------|-----------------|-----------------|-----------------|
| Ni(1) | 35(1)           | 16(1)           | 32(1)           | -3(1)           | -3(1)           | 0(1)            |
| Ni(2) | 30(1)           | 20(1)           | 34(1)           | 2(1)            | 1(1)            | 3(1)            |
| O(1)  | 40(4)           | 21(4)           | 36(4)           | -2(3)           | -13(3)          | 5(3)            |
| O(2)  | 43(5)           | 28(4)           | 43(5)           | -4(3)           | -8(4)           | 6(4)            |
| O(3)  | 64(6)           | 54(5)           | 58(6)           | -20(4)          | -25(5)          | 2(5)            |
| O(4)  | 32(4)           | 26(4)           | 51(5)           | 7(3)            | 7(3)            | 3(3)            |
| O(5)  | 43(5)           | 28(4)           | 44(4)           | 1(3)            | 12(4)           | 4(4)            |
| O(6)  | 52(6)           | 52(5)           | 70(6)           | -14(5)          | 16(5)           | -1(5)           |
| O(7)  | 24(4)           | 8(3)            | 33(4)           | 4(3)            | -13(3)          | -7(3)           |
| O(8)  | 28(4)           | 14(3)           | 23(3)           | 10(3)           | 0(3)            | 2(3)            |
| O(1W) | 34(4)           | 37(4)           | 49(5)           | -7(4)           | 19(4)           | -3(4)           |
| O(2W) | 30(4)           | 27(4)           | 44(5)           | 5(3)            | -9(3)           | 10(3)           |
| C(1)  | 29(6)           | 23(6)           | 36(6)           | 0(5)            | -2(5)           | 2(5)            |
| C(2)  | 37(7)           | 29(6)           | 34(6)           | -4(5)           | 7(5)            | -11(5)          |
| C(3)  | 28(6)           | 20(5)           | 43(7)           | -3(5)           | 2(5)            | 1(5)            |
| C(4)  | 46(7)           | 35(7)           | 45(7)           | -5(5)           | -4(6)           | -11(6)          |
| C(5)  | 66(9)           | 23(6)           | 80(10)          | 3(6)            | -3(8)           | -4(6)           |
| C(6)  | 87(11)          | 16(6)           | 82(10)          | -10(6)          | 8(9)            | 4(7)            |
| C(7)  | 56(9)           | 47(8)           | 59(8)           | -16(6)          | -3(7)           | -12(7)          |
| C(8)  | 37(7)           | 24(6)           | 46(7)           | -2(5)           | -1(5)           | 2(5)            |
| C(9)  | 53(8)           | 50(8)           | 37(7)           | -9(6)           | 11(6)           | -8(6)           |
| C(10) | 37(7)           | 39(6)           | 29(6)           | -6(5)           | -3(5)           | -3(5)           |
| C(11) | 83(11)          | 61(9)           | 63(9)           | -7(7)           | -34(8)          | 16(8)           |
| C(12) | 17(5)           | 23(5)           | 39(6)           | 1(4)            | -11(5)          | 6(4)            |
| C(13) | 25(6)           | 30(6)           | 34(6)           | -1(5)           | -3(5)           | 3(5)            |
| C(14) | 41(7)           | 28(6)           | 41(6)           | -4(5)           | -5(5)           | 4(5)            |
| C(15) | 53(8)           | 22(5)           | 33(6)           | 0(5)            | 4(5)            | 5(5)            |
| C(16) | 63(9)           | 38(7)           | 55(8)           | 4(6)            | 19(7)           | 7(6)            |
| C(17) | 63(9)           | 22(6)           | 72(9)           | -6(6)           | 5(7)            | 2(6)            |
| C(18) | 59(9)           | 44(7)           | 50(8)           | -3(6)           | 8(7)            | 5(7)            |
| C(19) | 36(7)           | 37(6)           | 43(7)           | -7(5)           | -16(6)          | 12(6)           |
| C(20) | 31(7)           | 43(7)           | 41(7)           | -2(5)           | -4(6)           | 7(6)            |

|       |       |       |        |        |        |       |
|-------|-------|-------|--------|--------|--------|-------|
| C(21) | 32(6) | 36(6) | 41(6)  | 3(5)   | 2(5)   | -3(5) |
| C(22) | 57(9) | 46(8) | 81(10) | 2(7)   | 30(7)  | 5(7)  |
| C(23) | 48(8) | 43(7) | 56(8)  | 8(6)   | -6(6)  | -2(6) |
| C(24) | 53(8) | 43(7) | 53(8)  | 2(6)   | 14(6)  | -8(6) |
| O(3W) | 52(6) | 59(6) | 84(7)  | -31(5) | -14(5) | 7(5)  |
| O(4W) | 73(7) | 47(5) | 82(7)  | 8(5)   | 4(5)   | 11(5) |

---

**Table S30.** Hydrogen coordinates ( $\times 10^4$ ) and isotropic displacement parameters ( $\text{\AA}^2 \times 10^3$ ) for **3**

|        | x         | y          | z        | U(eq) |
|--------|-----------|------------|----------|-------|
| H(1W1) | 6060(30)  | 4150(40)   | 6190(40) | 58    |
| H(1W2) | 6100(30)  | 5060(30)   | 6370(40) | 58    |
| H(2W1) | 8670(50)  | 3700(60)   | 6260(40) | 51    |
| H(2W2) | 9000(50)  | 2830(40)   | 6210(40) | 51    |
| H(4A)  | 7053      | 8342       | 6098     | 51    |
| H(5A)  | 7181      | 10036      | 6479     | 68    |
| H(6A)  | 8022      | 10381      | 7259     | 74    |
| H(7A)  | 8749      | 9109       | 7661     | 65    |
| H(11A) | 8894      | 4495       | 7419     | 106   |
| H(11B) | 9241      | 5298       | 7893     | 106   |
| H(11C) | 9564      | 5113       | 7255     | 106   |
| H(15A) | 8211      | -267       | 5413     | 43    |
| H(16A) | 8386      | -2074      | 5280     | 62    |
| H(17A) | 9205      | -2620      | 4618     | 63    |
| H(18A) | 9799      | -1481      | 4056     | 61    |
| H(22A) | 9842      | 3102       | 3711     | 90    |
| H(22B) | 10053     | 2173       | 3293     | 90    |
| H(22C) | 10539     | 2489       | 3876     | 90    |
| H(23A) | 9136      | 5218       | 4980     | 74    |
| H(23B) | 8971      | 5347       | 5675     | 74    |
| H(23C) | 8672      | 6150       | 5178     | 74    |
| H(24A) | 6858      | 2545       | 6222     | 73    |
| H(24B) | 7587      | 2953       | 6498     | 73    |
| H(24C) | 7547      | 1966       | 6071     | 73    |
| H(3W1) | 9520(60)  | 8360(80)   | 8470(50) | 99    |
| H(3W2) | 9990(20)  | 8820(110)  | 8830(60) | 99    |
| H(4W1) | 10750(70) | -1120(50)  | 3360(60) | 101   |
| H(4W2) | 10350(40) | -1720(100) | 3010(60) | 101   |

**Table S31.** Torsion angles [°] for **3**

---

|                       |            |
|-----------------------|------------|
| Ni(1)-O(1)-C(1)-C(10) | -171.0(9)  |
| Ni(1)-O(1)-C(1)-C(2)  | 6.6(11)    |
| Ni(1)-O(2)-C(2)-C(1)  | 3.0(11)    |
| Ni(1)-O(2)-C(2)-C(3)  | -178.4(7)  |
| O(1)-C(1)-C(2)-O(2)   | -6.6(14)   |
| C(10)-C(1)-C(2)-O(2)  | 171.1(10)  |
| O(1)-C(1)-C(2)-C(3)   | 174.8(9)   |
| C(10)-C(1)-C(2)-C(3)  | -7.5(15)   |
| O(2)-C(2)-C(3)-C(4)   | 7.4(15)    |
| C(1)-C(2)-C(3)-C(4)   | -174.1(9)  |
| O(2)-C(2)-C(3)-C(8)   | -172.8(9)  |
| C(1)-C(2)-C(3)-C(8)   | 5.8(14)    |
| C(8)-C(3)-C(4)-C(5)   | 1.4(17)    |
| C(2)-C(3)-C(4)-C(5)   | -178.8(10) |
| C(3)-C(4)-C(5)-C(6)   | -0.2(18)   |
| C(4)-C(5)-C(6)-C(7)   | 0(2)       |
| C(5)-C(6)-C(7)-C(8)   | -1(2)      |
| C(4)-C(3)-C(8)-C(7)   | -2.5(16)   |
| C(2)-C(3)-C(8)-C(7)   | 177.6(10)  |
| C(4)-C(3)-C(8)-C(9)   | 179.9(10)  |
| C(2)-C(3)-C(8)-C(9)   | 0.1(15)    |
| C(6)-C(7)-C(8)-C(3)   | 2.6(18)    |
| C(6)-C(7)-C(8)-C(9)   | -179.9(11) |
| C(3)-C(8)-C(9)-O(3)   | 177.9(10)  |
| C(7)-C(8)-C(9)-O(3)   | 0.4(17)    |
| C(3)-C(8)-C(9)-C(10)  | -4.5(16)   |
| C(7)-C(8)-C(9)-C(10)  | 178.1(10)  |
| O(1)-C(1)-C(10)-C(9)  | -179.5(10) |
| C(2)-C(1)-C(10)-C(9)  | 3.1(15)    |
| O(1)-C(1)-C(10)-C(11) | 1.0(18)    |
| C(2)-C(1)-C(10)-C(11) | -176.4(10) |
| O(3)-C(9)-C(10)-C(1)  | -179.5(10) |
| C(8)-C(9)-C(10)-C(1)  | 2.9(16)    |
| O(3)-C(9)-C(10)-C(11) | 0.0(17)    |
| C(8)-C(9)-C(10)-C(11) | -177.6(11) |

|                         |            |
|-------------------------|------------|
| Ni(2)-O(4)-C(12)-C(21)  | 169.7(8)   |
| Ni(2)-O(4)-C(12)-C(13)  | -9.2(10)   |
| Ni(2)-O(5)-C(13)-C(14)  | -174.4(7)  |
| Ni(2)-O(5)-C(13)-C(12)  | 4.6(11)    |
| O(4)-C(12)-C(13)-O(5)   | 3.2(13)    |
| C(21)-C(12)-C(13)-O(5)  | -175.8(9)  |
| O(4)-C(12)-C(13)-C(14)  | -177.7(9)  |
| C(21)-C(12)-C(13)-C(14) | 3.3(14)    |
| O(5)-C(13)-C(14)-C(15)  | -2.7(15)   |
| C(12)-C(13)-C(14)-C(15) | 178.3(9)   |
| O(5)-C(13)-C(14)-C(19)  | 179.9(9)   |
| C(12)-C(13)-C(14)-C(19) | 0.8(14)    |
| C(19)-C(14)-C(15)-C(16) | -1.6(16)   |
| C(13)-C(14)-C(15)-C(16) | -178.8(10) |
| C(14)-C(15)-C(16)-C(17) | 1.3(17)    |
| C(15)-C(16)-C(17)-C(18) | -1.5(19)   |
| C(16)-C(17)-C(18)-C(19) | 1.8(19)    |
| C(17)-C(18)-C(19)-C(14) | -1.9(17)   |
| C(17)-C(18)-C(19)-C(20) | 178.9(11)  |
| C(15)-C(14)-C(19)-C(18) | 1.8(16)    |
| C(13)-C(14)-C(19)-C(18) | 179.2(10)  |
| C(15)-C(14)-C(19)-C(20) | -179.0(10) |
| C(13)-C(14)-C(19)-C(20) | -1.6(15)   |
| C(18)-C(19)-C(20)-O(6)  | -3.4(16)   |
| C(14)-C(19)-C(20)-O(6)  | 177.4(10)  |
| C(18)-C(19)-C(20)-C(21) | 177.7(10)  |
| C(14)-C(19)-C(20)-C(21) | -1.5(15)   |
| O(4)-C(12)-C(21)-C(20)  | 174.6(9)   |
| C(13)-C(12)-C(21)-C(20) | -6.5(14)   |
| O(4)-C(12)-C(21)-C(22)  | -3.0(16)   |
| C(13)-C(12)-C(21)-C(22) | 175.9(10)  |
| O(6)-C(20)-C(21)-C(12)  | -173.2(10) |
| C(19)-C(20)-C(21)-C(12) | 5.7(15)    |
| O(6)-C(20)-C(21)-C(22)  | 4.5(16)    |
| C(19)-C(20)-C(21)-C(22) | -176.6(10) |

---

Symmetry transformations used to generate equivalent atoms: #1 -x+3/2,y,-z+1
